1 **Long noncoding RNA *VENTHEART* is required for cardiomyocyte specification and function**

2 Albert Dashi<sup>1,2,3</sup>, Wilson L.W. Tan<sup>1,2,3</sup>, Chukwuemeka George Anene-Nzelu<sup>1,2,3</sup>, Bangfen Pan<sup>1,2,3</sup>, Autio  
3 Matias Ilmari<sup>2,3</sup>, Zenia Tiang<sup>1,2,3</sup>, Robin J.G. Hartman<sup>3,4</sup>, Justus Stenzig<sup>9</sup>, Heming Wei<sup>5</sup>, Chen Gao Bin<sup>3</sup>,  
4 Matthew Andrew Ackers-Johnson<sup>1,2,3</sup>, Bing Lim<sup>6</sup>, Anna Walentinsson<sup>7</sup>, Vidhya Vardharajan Iyer<sup>8,10</sup>,  
5 Malin K.B. Jonsson<sup>1, 8#</sup>, Roger S. Foo<sup>1,2,3#</sup>

6

7 <sup>1</sup>Cardiovascular Disease Translational Research Programme, Yong Loo Lin School of Medicine,  
8 National University of Singapore, Singapore

9 <sup>2</sup>Cardiovascular Research Institute, National University Healthcare Systems, Singapore

10 <sup>3</sup>Genome Institute of Singapore, Agency for Science, Technology and Research, Singapore

11 <sup>4</sup>University of Utrecht, Heidelberglaan 8, 3584 CS Utrecht, the Netherlands.

12 <sup>5</sup>National Heart Research Institute Singapore (NHRIS), National Heart Centre Singapore

13 <sup>6</sup>Sana Biotechnology, 300 Technology Square, Cambridge, MA 02139, United State of America.

14 <sup>7</sup>Translational Science & Experimental Medicine, Research and Early Development, Cardiovascular,  
15 Renal and Metabolism (CVRM), BioPharmaceuticals R&D, AstraZeneca, Gothenburg, Sweden.

16 <sup>8</sup>Bioscience Cardiovascular, Research and Early Development, Cardiovascular, Renal and Metabolism  
17 (CVRM), BioPharmaceuticals R&D, AstraZeneca, Gothenburg, Sweden.

18 <sup>9</sup> University Medical Center Hamburg-Eppendorf, Hamburg, Germany

19 <sup>10</sup>Uppsala University, Uppsala, Sweden

20 #Shared senior authorship

21 **Corresponding author:**

22 Roger Foo

23 Genome Institute of Singapore

24 60 Biopolis Street

25 Singapore 138672

26 E: foosyr@gis.a-star.edu.sg

27 T: +44-66011036

28 F: +44-6808 8291

29 **ABSTRACT**

30 **Rationale:** Long noncoding RNAs (lncRNAs) control cardiac gene expression during heart  
31 development and disease. It is accordingly plausible for the same lncRNA to regulate both cardiac  
32 development, as well as play a role in adult heart disease progression. lncRNA regulators of early  
33 cardiomyocyte (CM) lineage commitment have been identified and characterised, however those  
34 controlling later CM specification remain unknown.

35 **Objectives:** In this study we identified a novel lncRNA required for CM specification, maturation and  
36 function, and also discovered its suggested relevance to heart disease.

37 **Methods and Results:** We performed single cell RNA-seq on human embryonic stem cell derived  
38 cardiomyocytes at 2, 6 and 12 weeks of differentiation. Weighted correlation network analysis  
39 (WGCNA) identified core gene modules, including lncRNAs highly abundant and uniquely expressed  
40 in the human heart. A lncRNA (we call *VENTHEART*, *VHRT*) co-expressed with cardiac maturation  
41 and ventricular-specific genes *MYL2* and *MYH7*, as well as in adult human ventricular tissue. CRISPR-  
42 mediated excision of *VHRT* led to impaired CM sarcomere formation, and loss of the CM  
43 specification gene program. *VHRT* knockdown (KD) in hESC-CMs confirmed its regulatory role for  
44 key cardiac contraction, calcium hemostasis and heart development genes, including *MYH6* and *RYR2*.  
45 Functional evaluation after *VHRT* KD using impedance-based technology and action potential  
46 recordings, proved reduced contraction amplitude and loss of the ventricular-like action potential in  
47 CM, respectively. Through an integrative analysis of genome-wide association studies (GWAS),  
48 expression quantitative trait locus (eQTL) and gene co-expression network, we found *VHRT* to be co-  
49 regulated with core cardiac contractile genes, and the likely source of a heart failure genetic association  
50 signal overlapping the *VHRT* gene locus. Finally, *VHRT* KD and human failing heart transcriptome  
51 comparison validates the consistent downregulation again of cardiac contractile and calcium regulatory  
52 genes ( $P < 0.05$ ).

53 **Conclusion.** We conclude that *VHRT* lncRNA is required for proper CM specification and function.  
54 Furthermore, reduced *VHRT* may contribute to the development or progression of human heart disease.

55 **Key words:** single cell RNAseq, transcriptomic, stem cell derived cardiomyocytes, lncRNA, cardiac  
56 myocyte specification and maturation, cardiomyocyte contraction, calcium signaling, heart disease.

57

## 58 INTRODUCTION

59 Cardiac development and heart disease progression are precisely coordinated at the transcriptome level  
60 where gene expression programs are jointly controlled through signaling pathways and epigenetic  
61 regulators. Human embryonic stem cell-derived cardiomyocytes (hESC-CMs) are a useful tool to study  
62 cardiac commitment through their defined stages of cardiac differentiation<sup>1,2</sup>. This *in vitro* system can  
63 model cardiac diseases including various forms of long QT syndrome<sup>3</sup>, arrhythmogenic right ventricular  
64 dysplasia<sup>4</sup>, hypertrophic cardiomyopathy<sup>5,6</sup> and ischemic heart conditions<sup>7</sup>. Furthermore, hESC-CM are  
65 routinely used to test novel drugs or therapeutic options. As examples, RNA interference (RNAi)  
66 rescued the disease phenotype of hESC-CMs carrying a mutation causing long QT syndrome<sup>8</sup>, or  
67 carrying a mutation in phospholamban that results in dilated and arrhythmogenic cardiomyopathy<sup>9</sup>.

68

69 As an *in vitro* cell model, many studies have investigated the mechanisms underlying early cardiac  
70 commitment from hESC through to mesoderm and cardiac progenitor stages, and the signaling  
71 pathways responsible for these transitions are relatively well-defined<sup>10,11</sup>. However, the later stages of  
72 CM specification and maturation are less well-studied. Other than transcription factors, chromatin  
73 modifiers and microRNAs that are well-known regulators of transcription, long noncoding RNAs  
74 (lncRNAs) represent an additional layer of regulation that coordinate cardiac gene programs. LncRNAs  
75 are >200 nucleotide long transcripts with limited protein coding potential, and often display species,  
76 tissue- and disease-specific expression patterns<sup>12</sup>. They are diverse in their cellular expression patterns,  
77 subcellular localization, evolutionary conservation, and mechanisms of action. Thousands of human  
78 cardiac lncRNAs have been catalogued<sup>13</sup>, but most remain to be functionally characterized. Previous  
79 examples for cardiac development are *Braveheart (Bvht)*, necessary for the progression of nascent  
80 mesoderm towards a cardiac fate through two different mechanisms of action<sup>14,15</sup>, and *Fendrr*,  
81 specifically expressed in the nascent lateral plate mesoderm and essential for proper development of the  
82 heart and body wall<sup>16</sup>. More recently, another lncRNA was found to regulate murine mesodermal

83 specification by recruiting transcription factors eomes, trithorax group (TrxG) subunit WDR5, and  
84 histone acetyltransferase GCN5 to the enhancer region of *Mesp1* gene, directly activating its  
85 expression<sup>17</sup>. These studies were implemented using global transcriptome analysis focused on early  
86 cardiac lineage commitment. Transcriptome profiling of the developing mammalian heart has also  
87 revealed lncRNAs uniquely expressed in certain sets of cells and activated upon specific stimuli<sup>18-20</sup>.  
88 As with early differentiation, distinct lncRNA expression patterns in specific stages and cell states of  
89 CM specification and maturation also underlie their essential biological function in heart disease.

90

91 Here, we have differentiated hESC to CM, and performed single cell RNA-seq analysis for co-  
92 expression and transcriptional changes that occurred in hESC-CMs over time in culture. Hypothesizing  
93 that key co-expressed lncRNAs could be drivers of CM specification, maturation and function, we  
94 identified *VENTHEART* (*VHRT*) that was co-regulated with core cardiac development and maturation  
95 genes and highly expressed in ventricular CMs. Additionally, an independent integrative analysis of  
96 genome-wide association studies (GWAS), expression quantitative trait locus (eQTL) and human heart  
97 tissue transcriptomes also pointed to the role of *VHRT* in cardiac function and heart failure disease  
98 association.

99

100

## 101 **RESULTS**

### 102 **Single cell RNA-seq of maturing hESC-CM identifies cardiac specific lncRNAs**

103 A human ESC line with a *MYH6*-GFP reporter was generated and differentiated into CMs, using the  
104 protocol published by Lian *et al*<sup>21</sup> with minor modifications (**Figure 1A, Supplementary Figure 1A-**  
105 **D**). To map the single cell transcriptome of maturing hESC-CM, we captured cells from week 2 (W02),  
106 week 6 (W06) and week 12 (W12) using the Fluidigm microfluidic C1 system. A total of 173 GFP+  
107 (CMs) and 35 GFP- (non-CMs) cells from two biological repeats were sequenced. To keep only the  
108 most optimum dataset, 21 samples were excluded from analysis due to either inadequate library size  
109 (<1 M reads) or a low number of detected transcripts (<2,000 genes expressed) (**Supplementary Tables**  
110 **1 and 2**). This resulted in a total of 36 CMs at W2, 60 CMs at W6 and 56 CMs at W12. To assess the

111 validity and quality of our data we undertook several further technical QC procedures (**Supplementary**  
112 **Figure 2A-F, Supplementary Table 1**). Only CMs (GFP+) were used for subsequent analysis for the  
113 remainder of this project. To confirm increased hESC-CM maturation, we firstly confirmed the  
114 consistent and timely upregulation of selected maturation genes (such as *TRDN*, *MYH7*, *TNNI3* and  
115 *MYL2*) (**Supplementary Figure 3A**), as well as calcium handling genes (*RYR2*, *ASPH*, *PLN* and  
116 *ATP2A2*). Notably, genes for cellular coupling gap junctions (*GJCI*), ion channel proteins (*KCNJ2*,  
117 *KCNA5*, *CACNAIG* and *HCN4*) and sarcomere assembly (*TCAP*) were also increased.

118

119 In order to explore for unsupervised co-regulated gene expression, we subjected the data to weighted  
120 correlation network analysis (WGCNA), and constructed gene-network modules that characterized  
121 expression changes across the time-course (**Supplementary Figure 4A, Supplementary Table 3**). Six  
122 modules differed significantly between the time points (**Figure 1B, Supplementary Figure 4B and**  
123 **Supplementary Table 4**). The “early-1” gene module consisted of genes highly expressed in W2 cells,  
124 and significantly downregulated in W6 and W12. Gene ontology (GO) functions for this “early-1”  
125 module was related to general tissue development and heart morphogenesis. The second module, “early-  
126 2”, was also highly expressed at W2, and decreased at W6 and W12. The “early-2” module included  
127 pathways related to protein transport and localization. “Early-3” was another module that showed  
128 decreased expression over the time-course and contained GO pathways linked to cell cycle control. A  
129 “midstage” module showed the distinct opposite pattern of increasing expression from W02 to W06,  
130 and a further increase at W12. Genes in the “midstage” module were related to cardiac muscle  
131 development, maturation and cardiac functions, reflecting hESC-CMs strengthening their cardiac  
132 identity after W2 and mature and specify over time. Two further “late” modules showed a statistically  
133 significant but less marked difference during the time-course. “Late-1” included genes with general  
134 functions such as tau protein binding, “late-2” were those involved in general metabolic processes.  
135 Genes in all six modules reliably segregated cells into the three time points (**Figure 1C**), giving a  
136 comprehensive single cell transcriptional landscape of maturing hESC-CM over this time course.

137

138 Next, we curated for lncRNAs that correlated with transcriptional changes, and paid specific attention  
139 to the “midstage” blue module with gene pathways involving cardiac muscle development and  
140 maturation processes, including sarcoplasmic reticulum ion transport and actin mediated cell  
141 contraction (**Figure 1D**). In this module we identified a set of lncRNAs highly co-regulated with other  
142 important cardiac specific genes (**Figure 1E**). Among them, three (*RP11-532N4.2*, *LINC00881* and  
143 *RP11-432J24.5*) are highly expressed in human hearts, and one (*RP1-46F2.2*, hg19 or *LINC01405*,  
144 hg38) is limited to only cardiac ventricle and skeletal muscle, as shown from the publicly available  
145 human tissue specific expression dataset (GTEx)<sup>22,23</sup> (**Supplementary Figure 4C**). Specifically,  
146 *LINC01405* we now call *VENTHEART* (*VHRT*), followed the tissue expression pattern of sarcomere  
147 assembly and calcium regulatory genes, including myosin light chain 2 (*MYL2*), myosin heavy chain  
148 beta (*MYH7*) and sarco/endoplasmic reticulum Ca<sup>2+</sup>-ATPase (*ATP2A2*), and showed the steepest  
149 increase over the time-course compared to the other lncRNAs (**Figure 1F**). Human ESC-CMs in our  
150 12-week time-course were largely negative for markers of the secondary heart field (*ISL1* and *KDR*),  
151 and instead positive for primary heart field markers, *TBX5* and *CORIN*<sup>18</sup>, and were MLC2v+ (encoded  
152 by *MYL2*) for ventricular-like CMs (**Supplementary Figure 3B-C**). Indeed ranking all W12 hESC-CM  
153 samples from low to high *VHRT* expression, confirmed that the expression of *MYL2*, *MYH7*, *ATP2A2*  
154 and other genes of the same module (“midstage”) was co-linear with *VHRT* (**Figure 1F**), suggesting  
155 again that there are shared regulatory properties between genes in this module.

156

#### 157 ***VENTHEART* is highly enriched in ventricular-like CMs.**

158 *VHRT* is highly conserved only among primates<sup>24</sup> (**Supplementary Figure 5A**), and the *VHRT* locus is  
159 annotated to comprise of 6 isoforms (**Figure 2A, Supplementary Table 5**). To confirm differential  
160 isoform expression, we performed primer specific RT-qPCR and identified isoform 6 as the most highly  
161 expressed in hESC-CMs (**Figure 2B**). Isoform 6 *VHRT* was abundant in the cytoplasmic compartment,  
162 whereas the other less expressed isoforms showed an unremarkable distribution across nuclear and  
163 cytoplasmic compartments (**Figure 2C, Supplementary Figure 5B**). For cell and tissue expression  
164 specificity, we found *VHRT* to be present in hESC-CM, but absent in human cardiac fibroblasts (hCF),  
165 smooth muscle cells (hCASMC), human monocytic cell line (hTHP-1) and human coronary artery

166 endothelial cells (hCAEC) (**Figure 2D**). Furthermore, human heart tissue expression analysis confirmed  
167 that *VHRT* is absent or lowly expressed in atria, compared to ventricular tissue (**Supplementary Figure**  
168 **5C**). This recapitulated data from GTEx portal, further underlining the specific *VHRT* expression  
169 pattern in the heart. The Coding Potential Calculator (CPC)<sup>25</sup> algorithm suggested that among all  
170 isoforms, isoform 6 may possess protein coding potential with a putative 76 aa long  
171 peptide<sup>26</sup>(**Supplementary Figure 6A-B**). We proceeded to test for the putative peptide empirically by  
172 FLAG-tag at either C-terminus or N-terminus of *VHRT*-6 sORF (without introns), cloning it into a  
173 vector for cell transfection. No bands were detected on Western blotting despite relevant positive  
174 controls (**Supplementary Figure 6C**). This may reflect the possibility that the transcript is not  
175 translated into a stable or functional peptide *in vitro*, and *VHRT* may function instead as a *bona fide*  
176 non-coding RNA.

177

### 178 ***VHRT* deletion disrupts CM specification**

179 To test the hypothesis that *VHRT* regulates CM differentiation or specification, we performed *VHRT*  
180 CRISPR/Cas9-directed knockout (KO) at hESC stage using a dual sgRNA system. To control for off-  
181 target effects from CRISPR-targeting, we designed 2 unique sgRNA pairs that targeted different  
182 locations of *VHRT* (**Figure 3A-B**). Two independent homozygous knockout hESC lines were obtained  
183 (clone 1: *VHRT* KO #1 and clone 16: *VHRT* KO #2). Untargeted cells were used as wild type control  
184 (clone 9: WT) (**Supplementary Figure 8A-B**). Independent tri-lineage differentiation proved that  
185 ectodermal, mesodermal and endodermal lineages were unaffected in both *VHRT* KO lines  
186 (**Supplementary Figure 9A**). We then differentiated WT and KO lines to CM in parallel. Apart from  
187 minimum variability between differentiations batches, both KO lines entered the initial stages of  
188 differentiation efficiently (**Supplementary Figure 9B**). Key genes of the cardiac progenitor stage, such  
189 as *NKX2-5*, were unchanged. The *MYH6*-GFP<sup>+</sup> signal however was significantly reduced in KO at day  
190 7-8, compared to WT (**Supplementary Figure 10A**), reflecting the likely importance of *VHRT* for the  
191 transition from cardiac progenitor to early CM. Remarkably, upon continued culture, *VHRT* KO cells  
192 showed reduced CM specification and maturation genes (**Figure 3C**), and an inability to adequately  
193 develop sarcomere structure and organization from W6 to W12. Hence, while WT hESC-CM

194 strengthened their characteristic cellular organization from W2 to W12, the lack of proper sarcomere  
195 assembly in *VHRT* KO #1 and *VHRT* KO #2 may reflect a failure to activate CM gene programs (**Figure**  
196 **3D, Supplementary Figure 10B-C**).

197

### 198 ***VHRT* deletion deregulates the transcriptome of maturing hESC-CM**

199 A small subset of *VHRT* KO cells (15% of *VHRT* KO #1, and 20% of *VHRT* KO #2) turned on the  
200 *MYH6*-GFP reporter during the differentiation protocol (**Supplementary Figure 11A**). This raised the  
201 question whether some *VHRT* KO cells developed general CM gene expression. We therefore isolated  
202 GFP+ cells from WT and *VHRT* KO #1 at W2, W6 and W12 (**Supplementary Figure 11B**), and  
203 performed RNA-seq to compare global gene expression. *VHRT* deletion resulted in a global increase in  
204 differentially expressed genes over time in culture (**Figure 3E-G**). Across W2, W6 and W12, cardiac  
205 contractile and calcium regulatory genes including *MYH7*, *MYL2*, *SLC8A1* and *IRX4* and failed to  
206 upregulate in *VHRT* KO, compared with WT (**Figure 3C-E, Supplementary Table 6**). In contrast,  
207 ectodermal and neuronal function genes, such as *SOX2*, *PAX6* and *RAX*, were significantly upregulated,  
208 especially in W12 *VHRT* KO cells (**Figure 3G, Supplementary Table 6**). Furthermore, genes involved  
209 in metabolic processes were persistently downregulated from W2 to W12, reflecting the lack of a  
210 maturation metabolic switch in *VHRT* KO (**Supplementary Table 6**).

211

### 212 ***VHRT* knockdown downregulates sarcomere assembly and calcium handling genes, and reduces** 213 **CM contractility**

214 Next, we sought to assess whether *VHRT* is also implicated in the regulation and maintenance of CM  
215 function in hES-CM. We therefore performed *VHRT* knockdown (KD) using 2 independent GapmeRs,  
216 specifically targeting *VHRT* isoform 6, since it is the most expressed isoform in hES-CMs (**Figure 4A**).  
217 This was carried out in W6 hESC-CM, where *VHRT* gene expression was elevated compared to  
218 preceding stages of differentiation. 75% *VHRT* KD was achieved with GapmeR#1, and 72.4% with  
219 GapmeR#2, respectively. (**Figure 4B**).

220



221 *VHRT* KD CM showed significant differentially expressed (DE) genes belonging to biological  
222 processes controlling cardiac electrophysiology, cardiac structure and heart development (**Figure 4C-**  
223 **D**). There was significant downregulation of structural and sarcomere assembly genes including *MYH6*,  
224 *FHOD3* and *MYOM1*, and known markers of heart tissue morphogenesis *TBX20*, *HEY2* and *ALPK3*.  
225 Remarkably, a strong repression was observed for calcium regulatory genes including *RYR2*, *SLC8A1*  
226 and *CMYA5* (**Figure 4E-F**). Importantly, these findings were specific because the same significant  
227 changes were not observed for other CM marker genes (**Figure 4B-D**, non-DE genes). To assess the  
228 function on contractility and CM electrophysiology, we also performed an independent *VHRT* siRNA  
229 KD, followed by impedance-based assays. *VHRT* KD significantly affected contractility performance,  
230 with decreased relaxation velocity, decreased upstroke velocity, decreased amplitude and a prolonged  
231 pulse width, compared to non-targeted siRNA (NT) and untreated (UT) controls (**Figure 4G**,  
232 **Supplementary Figure 11A**). *VHRT* KD induced similar changes in contractility as KD of *ATP2A2*,  
233 encoding for SERCA2a, consistent with altered calcium handling in *VHRT*-deficient CM. (**Figure 4G**,  
234 **Table 1**). Patch clamp experiments showed that *VHRT*-KD cells had significantly more positive  
235 maximum depolarization potential (MDP), compared to control ( $-54.2 \pm 6.5$  vs  $-61.2 \pm 7.1$  mV,  $n=28$ ,  
236  $p \leq 0.01$ ). *VHRT*-KD cells also displayed a more triangular action potential (AP) waveform, as assessed  
237 by either the APD90/APD50 ratio ( $1.34 \pm 0.12$  vs  $1.23 \pm 0.14$ ,  $p \leq 0.05$ ) or the APD90-APD20 difference  
238 ( $256 \pm 81$  vs  $166 \pm 50$  ms,  $p \leq 0.001$ ) (**Supplementary Figure 11B**). Representative AP from  
239 spontaneously beating cells and cells paced at 1Hz are shown in **Supplementary Figure 11C**. Taken  
240 together, these data confirmed that *VHRT* KD significantly compromised CM function.

241

#### 242 **Integrated GWAS and eQTL analysis implicates *VHRT* in human heart disease**

243 Related to the unique expression profile of *VHRT* for differentiating CMs above, and the well-known  
244 hallmark of “fetal gene reprogramming” in the heart disease stress-gene response, we also set out to  
245 investigate a potential role for *VHRT* in human heart disease, via analysis of publicly available genome-  
246 wide association study (GWAS) data sets<sup>27-31</sup>. Indeed, at least 2 independent GWAS signals were  
247 located in or near the *VHRT* locus at chromosome 12q24.11. Significant signals ( $p$ -value  $< 5e-8$ ) for  
248 coronary artery disease (CAD) and myocardial infarction (MI) overlapped with the genes *SH2B3* and

249 *ATXN2* downstream of *VHRT*, but these were unlikely related to *VHRT* as they did not associate with  
250 cardiac *VHRT* expression based on cis-eQTL data from human left ventricular (LV) samples.  
251 Instead, a tightly linked cluster of SNPs ( $r^2 > 0.8$ ) overlapping with the *VHRT* gene and significantly  
252 associated with *VHRT* expression in heart LV, showed suggestive association with non-ischemic heart  
253 failure (HF) ( $p$ -value=5e-5) (**Figure 5A, B**), indicating that the HF GWAS signal is most likely  
254 mediated by altered *VHRT* cardiac expression. SNPs associated with reduced cardiac *VHRT* expression  
255 were associated with increased risk for HF (OR=1.12-1.15) (**Supplementary Figure 12A-B**).  
256 Importantly, none of the SNPs showed association with *MYL2* cardiac expression, suggesting that  
257 *VHRT* rather than *MYL2* is the likely mediator of the observed cardiac disease GWAS signal. In line  
258 with these findings, cardiac *VHRT* mRNA expression was found to be downregulated in a  
259 transcriptomics study of patients with dilated cardiomyopathy, compared to healthy controls (adjusted  
260  $p$ -value<0.05)<sup>31</sup> (**Figure 5D**). We also performed co-expression analysis using GeneNetwork v2.0<sup>30</sup>,  
261 which predicted pathway and human phenotype associations using 31,499 public human RNA-seq  
262 samples. *VHRT* was once again tightly co-regulated with key CM sarcomeric genes, including *MYL2*,  
263 *MYL3*, *MYL1*, *MYH7*, *TCAP*, *CSRP3* and *TNNC1*, replicating the empirical evidence from the gene  
264 network analysis of single cell transcriptomes above. Furthermore, *VHRT* was predicted to participate  
265 in heart disease pathways and phenotypes including hypertrophic and dilated cardiomyopathy (HCM  
266 and DCM, respectively), as well as ventricular tachycardia (**Figure 5C, Supplementary Table 8**).

267

### 268 ***VHRT* KD transcriptome partially resembled that of gene expression changes in human heart** 269 **failure**

270 Building on the findings described above, we compared the *VHRT* KD transcriptome of DE genes  
271 (N=1,100; 573 down- and 527 upregulated) with the expression profile of the same genes in human  
272 failing hearts (Dilated Cardiomyopathy, DCM) (GEO accession: GSE141910). The latter study  
273 comprised of RNA-seq from 61 left ventricle explants of idiopathic DCM failing (n=29) and non-failing  
274 hearts (NF, n= 32) (**Supplementary Table 9**). Among *VHRT* KD DE genes, 73 (out of 1,100) were  
275 also differentially expressed in DCM hearts (**Figure 6A, Supplementary Figure 13, Supplementary**  
276 **Table 10**). Importantly, genes that were downregulated in *VHRT* KD, and recapitulated in DCM

277 (“Down/Down” group) contained those enriched in pathways regulating cardiac muscle contraction,  
278 hypertrophic cardiomyopathy (HCM) and dilated cardiomyopathy DCM ( $p \leq 0.05$ ), based on pathway  
279 and molecular function enrichment analysis using Enricher<sup>32</sup> (**Figure 6B**). Functional terms related to  
280 processes involved in actin filament binding and calcium handling ( $p \leq 0.05$ ), including genes such as  
281 *MYH6*, *CAMK1D*, *MYO7A* and *CACNB2* (**Figure 6C, Supplementary Figure 13**), pointing again to  
282 the potential mechanisms by which *VHRT* mediates disease progression in HF.

283

## 284 **DISCUSSION**

285 Our findings provide the first identification of the long non-coding RNA *VHRT* for CM specification,  
286 maturation, and its potential involvement in HF disease pathophysiology. By tracking single-cell  
287 resolution transcriptomes of hESC-CMs in prolonged culture, we have compiled an extensive catalogue  
288 of hESC-CM expressed genes. Co-expression gene networks, and integrative GWAS and eQTL  
289 analyses, highlighted *VHRT* as a novel ventricular-enriched lncRNA, whose expression is limited only  
290 to primates.

291

292 The overall immaturity of hESC-CMs in culture is well acknowledged. Simple extended time in culture  
293 is a useful means to achieve some additional maturity<sup>1,19,33,34</sup>. Our data reveals that key genes, *TNNI3*,  
294 *KCNJ2*, *CASQ2*, and *TCAP* are upregulated during CM maturation, appearing at W6 or W12. Between  
295 the 2 potassium channel genes: *KCNJ2*, which is ventricular-enriched, and *KCNA5*, which is  
296 predominantly atrial, we found that *KCNJ2*<sup>+</sup> and *KCNA5*<sup>+</sup> hES-CMs are mutually exclusive.  
297 Dichotomy for hESC-CMs in this differentiation protocol exists, at least in this respect<sup>35,36</sup>. We have  
298 thus observed that with the 12-week time-course in this differentiation protocol, hESC-CMs come to  
299 display largely primary heart field markers (*TBX5*, *HCN4* and *CORIN*), specifying mainly into  
300 ventricular-like cells, also corroborated by upregulated ventricular-enriched *MYL2*, *MYH7* and *IRX4*.  
301 This is consistent with the ventricular phenotype also described previously for this protocol<sup>21</sup>. Genes  
302 in the "early-1" gene module, abundant at W2, and subsequent downregulated in W6 and W12, included  
303 those that play a role in general organ development (*BMP2*, *FGF10*, *WNT11*, *TWIST1*, *SOX11* and  
304 *MEF2C*), indicating that even though W2 hESC-CMs are committed to the cardiac lineage, they retain

305 an overall generic transcriptome similar to cells in other organs. Similarly, genes in the “early-2” and  
306 “early-3” modules comprised of those for protein transport and localization, and cell cycle regulators  
307 (*PSMA6*, *PSMB5*, *PSMA3* and *PSMB4*) that regulate mitotic cell cycle G1/S checkpoint and DNA  
308 damage control. The downregulation of these genes coheres with the notion that hESC-CMs decrease  
309 their proliferative capacity over the differentiation time-course. In contrast, genes in the "midstage"  
310 module are significantly upregulated between W2 and W6, remaining stably abundant thereafter. These  
311 are genes related to cardiac development and maturation, including those responsible for cardiac  
312 contractile structures (*MYH7*, *TTN*, *MYL2*, *TNNI3*, *ASPH*, *MYBPC3*), higher-order myofibrillar  
313 organization, cytoskeletal assembly (*MURC132* and *LDB3133*), and calcium handling and transport  
314 (*RYR2*, *ATP2A2*, *CASQ1*, *ASPH*, *ANK2* and *SLC8A1*). The “late-1” and “late-2” modules contained  
315 genes that are only expressed in subsets of W12 cells, where their expression contributed to significant  
316 heterogeneity observed at the W12 stage. The "late-2" module comprised of a long list of ribosomal  
317 protein pseudogenes associated with general metabolic processes. The significance of the latter will  
318 need further investigation.

319

320 LncRNAs act as fine switches to modulate and orchestrate multiple aspects of cardiac development.  
321 In recent years, many cardiac lncRNAs have been catalogued and functionally characterized,  
322 especially for CM differentiation<sup>37-39</sup>. However, less is known for the later stages of CM specification  
323 and maturation. Moreover, finding lncRNAs that exclusively regulate either atrial, ventricular or  
324 pacemaker cells functions is challenging since different cardiac developmental stages are dictated by  
325 different epigenetic mechanisms. The "midstage" module contained specific cardiac protein coding  
326 genes known to support CM specification, maturation and function. Therefore, the transcriptional  
327 profile of this module accordingly identified CM specific and enriched lncRNAs, among which *VHRT*  
328 was highly co-regulated with *MYH7*, *MYL2*, *ATP2A2* and other cardiac maturation genes. Being  
329 enriched in human ventricular tissue, but not expressed in atrial tissue or other cell types of the heart,  
330 *VHRT* may indeed have a unique role in ventricular CM.

331

332 CM maturation and specification processes are promoted by pathways and gene programs for  
333 metabolism, myofiber structure, electrophysiology and cell cycle<sup>40</sup>. Myosin heavy-chains (MYH6  
334 and MYH7) and light-chains (MYL2) are myofiber proteins important for heart morphogenesis.  
335 Pathogenic *MYH7* mutations are causal to hypertrophic cardiomyopathy<sup>41</sup>. Patient-specific iPSC-CMs  
336 carrying the *MYH7*-E848G mutation, result in dysregulated myofibril alignment and contractile  
337 impairment<sup>42</sup>. In the same way, Wei Zhou et al.<sup>43</sup> differentiated hiPSC derived CM from patients with  
338 *MYL2*-R58Q<sup>44,45</sup> mutation and demonstrated that after 60 days in culture, *MYL2*-R58Q-iPSC-CMs  
339 also showed sarcomeric disorganization, calcium dysregulation and contractility malfunction. *VHRT*  
340 KO, starting from W6, displayed the similar myofilament disassembly and contractility defect,  
341 concurrent with the downregulation of cardiac contractile and calcium regulatory genes. Indeed,  
342 *VHRT*-KO phenocopies *MYL2*-R58Q and *MYH7*-E848G mutant CMs, implying that the overall  
343 deregulated CM gene programme caused by *VHRT*-KO is at least in part, similar to that regulating  
344 *MYL2* and *MYH7*. Importantly, pluripotency, mesendoderm and cardiac mesoderm stages were not  
345 affected by *VHRT* KO. This was also demonstrated by the finding that general CM genes were  
346 normally expressed at W2, whereas with time in culture, ectodermal and neuronal function genes  
347 became upregulated instead. However, unlike gene profiles of mutant *MYH7*<sup>46,47</sup> and *MYL2* cells<sup>48</sup>, the  
348 overall gene profile of W6-12 *VHRT*-KO (and KD) consistently show a downregulation of contractile  
349 and calcium regulatory genes, and the lack of a metabolic switch towards “mature” CMs. These  
350 results suggest a role for *VHRT* as an epigenetic switch for CM gene programmes during specification  
351 and maturation, instead of merely conferring effector functions like those of the sarcomeric  
352 components like *MYH7* or *MYL2*.

353

354 Other lncRNAs have also been shown to control cardiac gene expression previously. Many do so by  
355 interacting with repressive protein complexes and transcription factors in the nucleus, thereby  
356 regulating local gene expression through chromatin remodelling. Our characterization experiments  
357 however, show *VHRT* to be localized in CM cytoplasm, indicating that *VHRT* may regulate gene  
358 programs from the cytoplasmic compartment and not the nucleus, unlike mechanisms for the majority

359 of other lncRNAs. At least from our current assessment, *VHRT* does not appear to encode any detectably  
360 stable micropeptide in hES-derived CM. Instead, *VHRT* KD by GapmeR was sufficient to downregulate  
361 the expression of cardiac contraction, calcium transport and other ion channel genes. Whole cell patch  
362 clamp recordings confirmed that *VHRT* KD cells showed the loss of a ventricular-like action potential.  
363 Consistent with functional cytoplasmic *VHRT*, alternative siRNA-mediated *VHRT* KD also verified  
364 reduced CM relaxation velocity, upstroke velocity and contractility amplitude. Some lncRNAs are  
365 translocated out of the nucleus and shuttled to specific cytoplasmic locations to regulate protein  
366 expression or function. Some do so by sponging miRNA<sup>49</sup> and other by directly binding to protein or  
367 protein complexes. An example of the latter is the antisense lncRNA *ZFAS1*, which regulates Ca<sup>2+</sup> flux  
368 in the cells by directly inhibiting the activity of the protein SERCA2a (sarcoplasmic reticulum Ca<sup>2+</sup>-  
369 ATPase 2a)<sup>50</sup>. Overexpression of *ZFAS1* altered Ca<sup>2+</sup> flux leading to intracellular Ca<sup>2+</sup> overload in  
370 CM. Other lncRNAs, such as the *Sirt1* antisense lncRNA binds to *Sirt1* mRNA 3'-UTR and  
371 subsequently increased *Sirt1* abundance<sup>51</sup>. Exemplified by these examples, *VHRT* repression that  
372 negatively regulates the CM contraction and structural gene program, prompts the need for further  
373 studies to understand how cytoplasmic *VHRT* supports and stabilizes the activity and abundance of  
374 cardiac contractility genes expression.

375

376 To date many genetic variants have been associated with cardiovascular disease<sup>28</sup>, but few have been  
377 linked through lncRNAs function. An example is the cardioprotective lncRNA *Myocardial infarction*  
378 *associated transcript (MIAT)*. Six SNPs at the *MIAT* locus are associated with myocardial infarction  
379 (MI)<sup>52</sup>. More recently, three SNPs (e.g. rs7140721, rs3729829 and rs3729825) at the *Myosin Heavy*  
380 *Chain Associated RNA Transcript (MHRT)* locus are associated with increased risk of HF and  
381 prognosis<sup>53</sup>. Thus far, we have concluded, thorough integrative analysis of GWAS, cis-eQTL and RNA-  
382 seq from ~ 31,5K sample patients<sup>30</sup>, that a series of SNPs in the *VHRT* locus also associated with heart  
383 disease. The SNPs rs6489844-G and rs11065780-C are both associated with decreased *VHRT*  
384 expression in human left ventricle and increased risk for HF. Moreover, *VHRT* is downregulated in  
385 failing hearts from patients with DCM, reflecting the link between *VHRT* and HF. Indeed  
386 downregulated contractile and calcium regulatory genes in failing DCM hearts, consistent with

387 downregulated genes in VHRT KD, again concur with the possible mechanism mediated the  
388 contribution of VHRT to HF disease progression. The lack of species conservation for *VHRT*  
389 complicates *in-vivo* validation since a homologue for *VHRT* in rodents cannot be identified.  
390 Nevertheless, novel strategies to assess *VHRT* as a target for drug development are now attractive to  
391 pursue.

392

393 In conclusion, we have shown that *VHRT* is a crucial regulator for CM specification and lies upstream  
394 of key CM structural and contractile gene programs. Perturbation of *VHRT* results in the loss of CM  
395 contractile function. Moreover, concordant HF genome-wide analyses and human heart transcriptomic  
396 cross-comparisons motivate the need for follow up functional studies using models of heart disease.

397

#### 398 **ACKNOWLEDGEMENTS**

399 Singapore International Graduate Award (A.D.); EMBO long-term fellowship ‘EMBO ALTF 304-  
400 2012’ (M.K.B.J.). Funding from the Singapore National Medical Research Council (R.S.Y.F.) and  
401 A\*STaR Biomedical Research Council (R.S.Y.F., L.B.). Our gratitude to Dr. William Sun and Dr.  
402 Kristy Purnamawati for the use of their multielectrode system.

403

#### 404 **AUTHOR CONTRIBUTIONS**

405 AD, experimental planning and execution, figure preparation, manuscript drafting and writing

406 WT, bioinformatics analysis, figure preparation

407 CGA-N, experimental planning, figure preparation, manuscript writing

408 BP, cell culture and differentiation optimization

409 AM, CRISPR/Cas9 assay and experiments

410 CB, generation of MYH6 reporter line

411 MA, cell culture and RNA preparation

412 VV, contractility-based assay

413 RH, preparation of buffers and experimental assistance

414 ZT, library preparation for sequencing

415 HW, experimental planning and analysis, figure preparation

416 BL, senior supervisor, funding support

417 AW, bioinformatics analysis, figure preparation

418 MJ, study design, experimental planning and execution, analysis, figure preparation, manuscript  
419 drafting and writing

420 RF, senior supervisor, funding support, manuscript writing

421

## 422 **DISCLOSURE DECLARATION**

423 The authors declare that they have no conflict of interest. M.J. and A.W. are employed by AstraZeneca.

424

## 425 **METHODS AND MATERIALS**

426 See Supplementary information online for a detailed description of all methods and materials.

427

## 428 **REFERENCES**

- 429 1. Sartiani L, Bettioli E, Stillitano F, Mugelli A, Cerbai E, Jaconi ME. Developmental changes in  
430 cardiomyocytes differentiated from human embryonic stem cells: a molecular and  
431 electrophysiological approach. *Stem Cells* [Internet]. 2007;25:1136–1144. Available from:  
432 <https://www.ncbi.nlm.nih.gov/pubmed/17255522>
- 433 2. Karakikes I, Ameen M, Termglinchan V, Wu JC. Human induced pluripotent stem cell-  
434 derived cardiomyocytes: insights into molecular, cellular, and functional phenotypes. *Circ Res*  
435 [Internet]. 2015;117:80–88. Available from: <https://www.ncbi.nlm.nih.gov/pubmed/26089365>
- 436 3. Friedrichs S, Malan D, Voss Y, Sasse P. Scalable Electrophysiological Investigation of iPSC  
437 Cell-Derived Cardiomyocytes Obtained by a Lentiviral Purification Strategy. *J Clin Med*  
438 [Internet]. 2015;4:102–123. Available from: <https://www.ncbi.nlm.nih.gov/pubmed/26237021>
- 439 4. Kim C, Wong J, Wen J, Wang S, Wang C, Spiering S, Kan NG, Forcales S, Puri PL, Leone  
440 TC, Marine JE, Calkins H, Kelly DP, Judge DP, Chen HS. Studying arrhythmogenic right  
441 ventricular dysplasia with patient-specific iPSCs. *Nature* [Internet]. 2013;494:105–110.  
442 Available from: <https://www.ncbi.nlm.nih.gov/pubmed/23354045>



- 443 5. Wu H, Yang H, Rhee J-W, Zhang JZ, Lam CK, Sallam K, Chang ACY, Ma N, Lee J, Zhang  
444 H, Blau HM, Bers DM, Wu JC. Modelling diastolic dysfunction in induced pluripotent stem  
445 cell-derived cardiomyocytes from hypertrophic cardiomyopathy patients. *Eur Heart J*. 2019;
- 446 6. Li X, Lu WJ, Li Y, Wu F, Bai R, Ma S, Dong T, Zhang H, Lee AS, Wang Y, Lan F. MLP-  
447 deficient human pluripotent stem cell derived cardiomyocytes develop hypertrophic  
448 cardiomyopathy and heart failure phenotypes due to abnormal calcium handling. *Cell Death*  
449 *Dis*. 2019;10.
- 450 7. Cardiovascular diseases [Internet]. [cited 2019 Nov 14]; Available from:  
451 <https://www.who.int/health-topics/cardiovascular-diseases/>
- 452 8. Matsa E, Dixon JE, Medway C, Georgiou O, Patel MJ, Morgan K, Kemp PJ, Staniforth A,  
453 Mellor I, Denning C. Allele-specific RNA interference rescues the long-QT syndrome  
454 phenotype in human-induced pluripotency stem cell cardiomyocytes. *Eur Hear J* [Internet].  
455 2014;35:1078–1087. Available from: <https://www.ncbi.nlm.nih.gov/pubmed/23470493>
- 456 9. Stroik DR, Ceholski DK, Mleczko J, Thanel PF, Bidwell PA, Autry JM, Cornea RL, Thomas  
457 DD. Viral expression of a SERCA2a-activating PLB mutant improves calcium cycling and  
458 synchronicity in dilated cardiomyopathic hiPSC-CMs. *bioRxiv*. 2019;699975.
- 459 10. Domian IJ, Chiravuri M, van der Meer P, Feinberg AW, Shi X, Shao Y, Wu SM, Parker KK,  
460 Chien KR. Generation of functional ventricular heart muscle from mouse ventricular  
461 progenitor cells. *Science (80- )* [Internet]. 2009;326:426–429. Available from:  
462 <https://www.ncbi.nlm.nih.gov/pubmed/19833966>
- 463 11. Kattman SJ, Witty AD, Gagliardi M, Dubois NC, Niapour M, Hotta A, Ellis J, Keller G.  
464 Stage-specific optimization of activin/nodal and BMP signaling promotes cardiac  
465 differentiation of mouse and human pluripotent stem cell lines. *Cell Stem Cell* [Internet].  
466 2011;8:228–240. Available from: <https://www.ncbi.nlm.nih.gov/pubmed/21295278>
- 467 12. Ulitsky I, Bartel DP. XlincRNAs: Genomics, evolution, and mechanisms. *Cell*. 2013;
- 468 13. van Heesch S, Witte F, Schneider-Lunitz V, Schulz JF, Adami E, Faber AB, Kirchner M,  
469 Maatz H, Blachut S, Sandmann CL, Kanda M, Worth CL, Schafer S, Calviello L, Merriott R,  
470 Patone G, Hummel O, Wyler E, Obermayer B, Mucke MB, Lindberg EL, Trnka F, Memczak

- 471 S, Schilling M, Felkin LE, Barton PJR, Quaife NM, Vanezis K, Diecke S, Mukai M, Mah N,  
472 Oh SJ, Kurtz A, Schramm C, Schwinge D, Sebode M, Harakalova M, Asselbergs FW, Vink A,  
473 de Weger RA, Viswanathan S, Widjaja AA, Gartner-Rommel A, Milting H, Dos Remedios C,  
474 Knosalla C, Mertins P, Landthaler M, Vingron M, Linke WA, Seidman JG, Seidman CE,  
475 Rajewsky N, Ohler U, Cook SA, Hubner N. The Translational Landscape of the Human Heart.  
476 *Cell* [Internet]. 2019;178:242-260 e29. Available from:  
477 <https://www.ncbi.nlm.nih.gov/pubmed/31155234>
- 478 14. Klattenhoff CA, Scheuermann JC, Surface LE, Bradley RK, Fields PA, Steinhauser ML, Ding  
479 H, Butty VL, Torrey L, Haas S, Abo R, Tabebordbar M, Lee RT, Burge CB, Boyer LA.  
480 Braveheart, a long noncoding RNA required for cardiovascular lineage commitment. *Cell*  
481 [Internet]. 2013;152:570–583. Available from: [internal-pdf://146.143.144.64/Braveheart, a](internal-pdf://146.143.144.64/Braveheart_a_Long_Noncoding.pdf)  
482 [Long Noncoding.pdf](internal-pdf://146.143.144.64/Braveheart_a_Long_Noncoding.pdf)
- 483 15. Xue Z, Hennelly S, Doyle B, Gulati AA, Novikova I V, Sanbonmatsu KY, Boyer LA. A G-  
484 Rich Motif in the lncRNA Braveheart Interacts with a Zinc-Finger Transcription Factor to  
485 Specify the Cardiovascular Lineage. *Mol Cell* [Internet]. 2016;64:37–50. Available from:  
486 <https://www.ncbi.nlm.nih.gov/pubmed/27618485>
- 487 16. Sauvageau M, Goff LA, Lodato S, Bonev B, Groff AF, Gerhardinger C, Sanchez-Gomez DB,  
488 Hacısuleyman E, Li E, Spence M, Liapis SC, Mallard W, Morse M, Swerdel MR, D'Ecclesiss  
489 MF, Moore JC, Lai V, Gong G, Yancopoulos GD, Friendewey D, Kellis M, Hart RP,  
490 Valenzuela DM, Arlotta P, Rinn JL. Multiple knockout mouse models reveal lincRNAs are  
491 required for life and brain development. *Elife* [Internet]. 2013;2:e01749. Available from:  
492 <https://www.ncbi.nlm.nih.gov/pubmed/24381249>
- 493 17. Guo X, Xu Y, Wang Z, Wu Y, Chen J, Wang G, Lu C, Jia W, Xi J, Zhu S, Jiapaer Z, Wan X,  
494 Liu Z, Gao S, Kang J. A Linc1405/Eomes Complex Promotes Cardiac Mesoderm  
495 Specification and Cardiogenesis. *Cell Stem Cell* [Internet]. 2018;22:893-908 e6. Available  
496 from: [internal-pdf://113.73.8.13/linc1405 -exom regualtion.pdf](internal-pdf://113.73.8.13/linc1405_exom_regualtion.pdf)
- 497 18. Zhang JZ, Termglinchan V, Shao NY, Itzhaki I, Liu C, Ma N, Tian L, Wang VY, Chang ACY,  
498 Guo H, Kitani T, Wu H, Lam CK, Kodo K, Sayed N, Blau HM, Wu JC. A Human iPSC

- 499 Double-Reporter System Enables Purification of Cardiac Lineage Subpopulations with  
500 Distinct Function and Drug Response Profiles. *Cell Stem Cell* [Internet]. 2019;24:802-811 e5.  
501 Available from: <https://www.ncbi.nlm.nih.gov/pubmed/30880024>
- 502 19. DeLaughter DM, Bick AG, Wakimoto H, McKean D, Gorham JM, Kathiriya IS, Hinson JT,  
503 Homsy J, Gray J, Pu W, Bruneau BG, Seidman JG, Seidman CE. Single-Cell Resolution of  
504 Temporal Gene Expression during Heart Development. *Dev Cell* [Internet]. 2016;39:480–490.  
505 Available from: <https://www.ncbi.nlm.nih.gov/pubmed/27840107>
- 506 20. Li G, Xu A, Sim S, Priest JR, Tian X, Khan T, Quertermous T, Zhou B, Tsao PS, Quake SR,  
507 Wu SM. Transcriptomic Profiling Maps Anatomically Patterned Subpopulations among Single  
508 Embryonic Cardiac Cells. *Dev Cell* [Internet]. 2016;39:491–507. Available from:  
509 <https://www.ncbi.nlm.nih.gov/pubmed/27840109>
- 510 21. Lian X, Zhang J, Azarin SM, Zhu K, Hazeltine LB, Bao X, Hsiao C, Kamp TJ, Palecek SP.  
511 Directed cardiomyocyte differentiation from human pluripotent stem cells by modulating  
512 Wnt/beta-catenin signaling under fully defined conditions. *Nat Protoc* [Internet]. 2013;8:162–  
513 175. Available from: <https://www.ncbi.nlm.nih.gov/pubmed/23257984>
- 514 22. GTEx Portal [Internet]. [cited 2019 Nov 9];Available from: <https://www.gtexportal.org/home/>
- 515 23. Carithers LJ, Moore HM. The Genotype-Tissue Expression (GTEx) Project. *Biopreserv*  
516 *Biobank* [Internet]. 2015;13:307–308. Available from:  
517 <https://www.ncbi.nlm.nih.gov/pubmed/26484569>
- 518 24. Ensembl genome browser 98 [Internet]. [cited 2019 Dec 28];Available from:  
519 <https://asia.ensembl.org/index.html>
- 520 25. Kong L, Zhang Y, Ye ZQ, Liu XQ, Zhao SQ, Wei L, Gao G. CPC: assess the protein-coding  
521 potential of transcripts using sequence features and support vector machine. *Nucleic Acids Res*  
522 [Internet]. 2007;35:W345-9. Available from: <https://www.ncbi.nlm.nih.gov/pubmed/17631615>
- 523 26. Uncharacterized protein - Homo sapiens (Human) [Internet]. [cited 2019 Nov 10];Available  
524 from: <https://www.uniprot.org/uniprot/Q8IVN4>
- 525 27. Aragam KG, Chaffin M, Levinson RT, McDermott G, Choi SH, Shoemaker MB, Haas ME,  
526 Weng LC, Lindsay ME, Smith JG, Newton-Cheh C, Roden DM, London B, Wells QS, Ellinor

- 527 PT, Kathiresan S, Lubitz SA. Phenotypic Refinement of Heart Failure in a National Biobank  
528 Facilitates Genetic Discovery. *Circulation*. 2019;
- 529 28. Nikpay M, Goel A, Won HH, Hall LM, Willenborg C, Kanoni S, Saleheen D, Kyriakou T,  
530 Nelson CP, CHopewell J, Webb TR, Zeng L, Dehghan A, Alver M, MArmasu S, Auro K,  
531 Bjornnes A, Chasman DI, Chen S, Ford I, Franceschini N, Gieger C, Grace C, Gustafsson S,  
532 Huang J, Hwang SJ, Kim YK, Kleber ME, Lau KW, Lu X, Lu Y, Lyytikäinen LP, Mihailov E,  
533 Morrison AC, Pervjakova N, Qu L, Rose LM, Salfati E, Saxena R, Scholz M, Smith A V.,  
534 Tikkanen E, Uitterlinden A, Yang X, Zhang W, Zhao W, De Andrade M, De Vries PS, Van  
535 Zuydam NR, Anand SS, Bertram L, Beutner F, Dedoussis G, Frossard P, Gauguier D, Goodall  
536 AH, Gottesman O, Haber M, Han BG, Huang J, Jalilzadeh S, Kessler T, König IR, Lannfelt L,  
537 Lieb W, Lind L, MLindgren C, Lokki ML, Magnusson PK, Mallick NH, Mehra N, Meitinger  
538 T, Memon FUR, Morris AP, Nieminen MS, Pedersen NL, Peters A, Rallidis LS, Rasheed A,  
539 Samuel M, Shah SH, Sinisalo J, EStirrup K, Trompet S, Wang L, Zaman KS, Ardisino D,  
540 Boerwinkle E, Borecki IB, Bottinger EP, Buring JE, Chambers JC, Collins R, Cupples L,  
541 Danesh J, Demuth I, Elosua R, Epstein SE, et al. A comprehensive 1000 Genomes-based  
542 genome-wide association meta-analysis of coronary artery disease. *Nat Genet*. 2015;
- 543 29. Roselli C, Chaffin MD, Weng LC, Aeschbacher S, Ahlberg G, Albert CM, Almgren P, Alonso  
544 A, Anderson CD, Aragam KG, Arking DE, Barnard J, Bartz TM, Benjamin EJ, Bihlmeyer  
545 NA, Bis JC, Bloom HL, Boerwinkle E, Bottinger EB, Brody JA, Calkins H, Campbell A,  
546 Cappola TP, Carlquist J, Chasman DI, Chen LY, Chen YDI, Choi EK, Choi SH,  
547 Christophersen IE, Chung MK, Cole JW, Conen D, Cook J, Crijns HJ, Cutler MJ, Damrauer  
548 SM, Daniels BR, Darbar D, Delgado G, Denny JC, Dichgans M, Dörr M, Dudink EA, Dudley  
549 SC, Esa N, Esko T, Eskola M, Fatkin D, Felix SB, Ford I, Franco OH, Geelhoed B, Grewal  
550 RP, Gudnason V, Guo X, Gupta N, Gustafsson S, Gutmann R, Hamsten A, Harris TB,  
551 Hayward C, Heckbert SR, Hernesniemi J, Hocking LJ, Hofman A, Horimoto ARVR, Huang J,  
552 Huang PL, Huffman J, Ingelsson E, Ipek EG, Ito K, Jimenez-Conde J, Johnson R, Jukema JW,  
553 Kääb S, Kähönen M, Kamatani Y, Kane JP, Kastrati A, Kathiresan S, Katschnig-Winter P,  
554 Kavousi M, Kessler T, Kietselaer BL, Kirchhof P, Kleber ME, Knight S, Krieger JE, Kubo M,

- 555 Launer LJ, Laurikka J, Lehtimäki T, Leineweber K, Lemaitre RN, Li M, Lim HE, et al. Multi-  
556 ethnic genome-wide association study for atrial fibrillation. *Nat Genet.* 2018;
- 557 30. Deelen P, van Dam S, Herkert JC, Karjalainen JM, Brugge H, Abbott KM, van Diemen CC,  
558 van der Zwaag PA, Gerkes EH, Zonneveld-Huijssoon E, Boer-Bergsma JJ, Folkertsma P,  
559 Gillett T, van der Velde KJ, Kanninga R, van den Akker PC, Jan SZ, Hoorntje ET, te Rijdt  
560 WP, Vos YJ, Jongbloed JDH, van Ravenswaaij-Arts CMA, Sinke R, Sikkema-Raddatz B,  
561 Kerstjens-Frederikse WS, Swertz MA, Franke L. Improving the diagnostic yield of exome-  
562 sequencing by predicting gene–phenotype associations using large-scale gene expression  
563 analysis. *Nat Commun.* 2019;
- 564 31. GEO Accession viewer [Internet]. [cited 2019 Dec 19]; Available from:  
565 <https://www.ncbi.nlm.nih.gov/geo/query/acc.cgi?acc=GSE1145>
- 566 32. Chen EY, Tan CM, Kou Y, Duan Q, Wang Z, Meirelles G V., Clark NR, Ma’ayan A. Enrichr:  
567 Interactive and collaborative HTML5 gene list enrichment analysis tool. *BMC Bioinformatics.*  
568 2013;
- 569 33. Otsuji TG, Minami I, Kurose Y, Yamauchi K, Tada M, Nakatsuji N. Progressive maturation in  
570 contracting cardiomyocytes derived from human embryonic stem cells: Qualitative effects on  
571 electrophysiological responses to drugs. *Stem Cell Res* [Internet]. 2010;4:201–213. Available  
572 from: <https://www.ncbi.nlm.nih.gov/pubmed/20199896>
- 573 34. Kuppusamy KT, Jones DC, Sperber H, Madan A, Fischer KA, Rodriguez ML, Pabon L, Zhu  
574 WZ, Tulloch NL, Yang X, Sniadecki NJ, Laflamme MA, Ruzzo WL, Murry CE, Ruohola-  
575 Baker H. Let-7 family of microRNA is required for maturation and adult-like metabolism in  
576 stem cell-derived cardiomyocytes. *Proc Natl Acad Sci U S A* [Internet]. 2015;112:E2785-94.  
577 Available from: <https://www.ncbi.nlm.nih.gov/pubmed/25964336>
- 578 35. Gaborit N, Le Bouter S, Szuts V, Varro A, Escande D, Nattel S, Demolombe S. Regional and  
579 tissue specific transcript signatures of ion channel genes in the non-diseased human heart. *J*  
580 *Physiol* [Internet]. 2007;582:675–693. Available from:  
581 <https://www.ncbi.nlm.nih.gov/pubmed/17478540>
- 582 36. Devalla HD, Schwach V, Ford JW, Milnes JT, El-Haou S, Jackson C, Gkatzis K, Elliott DA,

- 583 Chuva de Sousa Lopes SM, Mummery CL, Verkerk AO, Passier R. Atrial-like cardiomyocytes  
584 from human pluripotent stem cells are a robust preclinical model for assessing atrial-selective  
585 pharmacology. *EMBO Mol Med* [Internet]. 2015;7:394–410. Available from:  
586 <https://www.ncbi.nlm.nih.gov/pubmed/25700171>
- 587 37. Klattenhoff CA, Scheuermann JC, Surface LE, Bradley RK, Fields PA, Steinhauser ML, Ding  
588 H, Butty VL, Torrey L, Haas S, Abo R, Tabebordbar M, Lee RT, Burge CB, Boyer LA.  
589 Braveheart, a long noncoding RNA required for cardiovascular lineage commitment. *Cell*  
590 [Internet]. 2013;152:570–583. Available from:  
591 <https://www.ncbi.nlm.nih.gov/pubmed/23352431>
- 592 38. Guo X, Xu Y, Wang Z, Wu Y, Chen J, Wang G, Lu C, Jia W, Xi J, Zhu S, Jiapaer Z, Wan X,  
593 Liu Z, Gao S, Kang J. A Linc1405/Eomes Complex Promotes Cardiac Mesoderm  
594 Specification and Cardiogenesis. *Cell Stem Cell*. 2018;22:893-908.e6.
- 595 39. Ounzain S, Micheletti R, Arnan C, Plaisance I, Cecchi D, Schroen B, Reverter F, Alexanian  
596 M, Gonzales C, Ng SY, Bussotti G, Pezzuto I, Notredame C, Heymans S, Guigo R, Johnson R,  
597 Pedrazzini T. CARMEN, a human super enhancer-associated long noncoding RNA controlling  
598 cardiac specification, differentiation and homeostasis. *J Mol Cell Cardiol* [Internet].  
599 2015;89:98–112. Available from: <https://www.ncbi.nlm.nih.gov/pubmed/26423156>
- 600 40. Maroli G, Braun T. The long and winding road of cardiomyocyte maturation. *Cardiovasc Res*.  
601 2020;
- 602 41. Viswanathan SK, Sanders HK, McNamara JW, Jagadeesan A, Jahangir A, Tajik AJ,  
603 Sadayappan S. Hypertrophic cardiomyopathy clinical phenotype is independent of gene  
604 mutation and mutation dosage. *PLoS One*. 2017;
- 605 42. Yang KC, Breitbart A, De Lange WJ, Hofsteen P, Futakuchi-Tsuchida A, Xu J, Schopf C,  
606 Razumova M V., Jiao A, Boucek R, Pabon L, Reinecke H, Kim DH, Ralphe JC, Regnier M,  
607 Murry CE. Novel Adult-Onset Systolic Cardiomyopathy Due to MYH7 E848G Mutation in  
608 Patient-Derived Induced Pluripotent Stem Cells. *JACC Basic to Transl Sci*. 2018;
- 609 43. Zhou W, Bos JM, Ye D, Tester DJ, Hrstka S, Maleszewski JJ, Ommen SR, Nishimura RA,  
610 Schaff H V, Kim CS, Ackerman MJ. Induced Pluripotent Stem Cell-Derived Cardiomyocytes

- 611 from a Patient with MYL2-R58Q-Mediated Apical Hypertrophic Cardiomyopathy Show  
612 Hypertrophy, Myofibrillar Disarray, and Calcium Perturbations. *J Cardiovasc Transl Res*  
613 [Internet]. 2019; Available from: <https://www.ncbi.nlm.nih.gov/pubmed/30796699>
- 614 44. Greenberg MJ, Watt JD, Jones M, Kazmierczak K, Szczesna-Cordary D, Moore JR.  
615 Regulatory light chain mutations associated with cardiomyopathy affect myosin mechanics  
616 and kinetics. *J Mol Cell Cardiol* [Internet]. 2009;46:108–115. Available from:  
617 <https://www.ncbi.nlm.nih.gov/pubmed/18929571>
- 618 45. Kampourakis T, Ponnampalani S, Irving M. Hypertrophic cardiomyopathy mutation R58Q in the  
619 myosin regulatory light chain perturbs thick filament-based regulation in cardiac muscle. *J*  
620 *Mol Cell Cardiol* [Internet]. 2018;117:72–81. Available from:  
621 <https://www.ncbi.nlm.nih.gov/pubmed/29452157>
- 622 46. Cohn R, Thakur K, Lowe A, Ladha FA, Pettinato AM, Romano R, Meredith E, Chen YS,  
623 Atamanuk K, Huey BD, Hinson JT. A Contraction Stress Model of Hypertrophic  
624 Cardiomyopathy due to Sarcomere Mutations. *Stem Cell Reports*. 2019;
- 625 47. Mosqueira D, Mannhardt I, Bhagwan JR, Lis-Slimak K, Katili P, Scott E, Hassan M,  
626 Prondzynski M, Harmer SC, Tinker A, Smith JGW, Carrier L, Williams PM, Gaffney D,  
627 Eschenhagen T, Hansen A, Denning C. CRISPR/Cas9 editing in human pluripotent stemcell-  
628 cardiomyocytes highlights arrhythmias, hypocontractility, and energy depletion as potential  
629 therapeutic targets for hypertrophic cardiomyopathy. *Eur Heart J*. 2018;
- 630 48. Brodehl A, Ebbinghaus H, Deutsch MA, Gummert J, Gärtner A, Ratnavadivel S, Milting H.  
631 Human induced pluripotent stem-cell-derived cardiomyocytes as models for genetic  
632 cardiomyopathies. *Int. J. Mol. Sci*. 2019;
- 633 49. Liu J, Li Y, Lin B, Sheng Y, Yang L. HBL1 Is a Human Long Noncoding RNA that  
634 Modulates Cardiomyocyte Development from Pluripotent Stem Cells by Counteracting MIR1.  
635 *Dev Cell* [Internet]. 2017;42:333-348 e5. Available from:  
636 <https://www.ncbi.nlm.nih.gov/pubmed/28829943>
- 637 50. Zhang Y, Jiao L, Sun L, Li Y, Gao Y, Xu C, Shao Y, Li M, Li C, Lu Y, Pan Z, Xuan L, Zhang  
638 Y, Li Q, Yang R, Zhuang Y, Zhang Y, Yang B. LncRNA ZFAS1 as a SERCA2a inhibitor to

- 639 cause intracellular Ca<sup>2+</sup> overload and contractile dysfunction in a mouse model of myocardial  
640 infarction. *Circ Res*. 2018;
- 641 51. Li B, Hu Y, Li X, Jin G, Chen X, Chen G, Chen Y, Huang S, Liao W, Liao Y, Teng Z, Bin J.  
642 Sirt1 antisense long noncoding rna promotes cardiomyocyte proliferation by enhancing the  
643 stability of sirt1. *J Am Heart Assoc*. 2018;
- 644 52. Ishii N, Ozaki K, Sato H, Mizuno H, Susumu Saito, Takahashi A, Miyamoto Y, Ikegawa S,  
645 Kamatani N, Hori M, Satoshi Saito, Nakamura Y, Tanaka T. Identification of a novel non-  
646 coding RNA, MIAT, that confers risk of myocardial infarction. *J Hum Genet*. 2006;51:1087–  
647 1099.
- 648 53. Zhang G, Dou L, Chen Y. Association of long-chain non-coding RNA MHRT gene single  
649 nucleotide polymorphism with risk and prognosis of chronic heart failure. *Medicine*  
650 (*Baltimore*). 2020;
- 651 54. Pruim RJ, Welch RP, Sanna S, Teslovich TM, Chines PS, Gliedt TP, Boehnke M, Abecasis  
652 GR, Willer CJ, Frishman D. LocusZoom: Regional visualization of genome-wide association  
653 scan results. In: *Bioinformatics*. 2011.
- 654
- 655



656 **FIGURE LEGENDS**

657 **Figure 1. Single cells RNA-seq analysis identifies cardiac enriched lncRNAs in week 2-12 hESC-**

658 **CM. (A)**, A schematic of the experimental plan. Differentiation of hESC to CM was performed over 7

659 days under insulin-free conditions and with the addition of small molecule CHIR99012 at day 0 and

660 IWP2 at day 3. Additional media change was performed on days as denoted (\*). 36 cells were harvested

661 on week 2 (W02), 60 cells on week 6 (W06) and 56 cells on week 12 (W12). Immunofluorescence

662 staining for cardiac alpha actinin (ACTN2, red) mark sarcomeres, and green represents *MYH6*-GFP

663 reporter signal. **(B)**, Violin plots showing the overall levels of gene expression within each gene module.

664 Each of the six modules (early-1, early-2, early-3, midstage, late-1, late-2) shows either overall increase

665 or decrease gene expression over time. Black lines track the median expression values across the time

666 points. **(C)**, Heatmap showing the expression of all genes in the six modules with genes in columns.

667 Cells from each time point and replicates are in rows. **(D)**, Histogram showing top 10 biological

668 processes of genes in the “midstage” blue module. **(E)**, Plot showing the connectivity (KME values) of

669 lncRNAs associated with the other protein coding genes in the “midstage” module. Highly connected

670 lncRNAs with KME values closest to 1 represent those most highly co-regulated with other genes in

671 the module. Five highly co-regulated lncRNAs that are highly expressed in muscle heart are indicated.

672 *RP1-46F2.2* (we call *VENTHEART*, *VHRT*; on chromosome 12) is annotated in red. **(F)**, Plot showing

673 the expression of all “midstage” module genes (expression z-scores) in W12 hES-CMs ranked from 1

674 to 56 according to *VHRT* expression (red line). *VENTHEART* is correlated with the expression with core

675 cardiac genes *MYL2*, *MYH7*, *ATP2A2*, and other genes of the “midstage” module. Lines are fitted linear

676 for z-score values.

677

678 **Figure 2. Characterisation of *VENTHEART* expression in human hES-CM. (A)**, Schematic

679 representing the 6 *VHRT* isoforms annotated on NONCODE and ENSEMBL. Top panel, red boxes

680 represent exons. Exon 1 is shared by all isoforms. Lower panel shows normalized FPKM peaks from

681 single cell RNA-seq for W02 (red), W06 (yellow) and W12 (blue), reflecting expression abundance of

682 *VHRT* at each time point. **(B)**, Relative quantification of specific *VHRT* isoforms expression. Data are

683 represented as mean  $\pm$  s.e.m., n=3; \* *p*-value < 0.05 are represented; n.s.: not significant. Student's t-

684 test. (C), Graphs showing nuclear and cytoplasmic fractions. *GAPDH* and *18s* used as positive controls  
685 for cytoplasmic compartment, and nuclear compartment with *U6* and *MALAT1*. Expression are shown  
686 as percentage relative to nuclear fraction. n=3 biological replicates. \* represents  $p \leq 0.05$ . Student's  
687 paired t-test with a two-tailed distribution. (D), *VHRT* expression is present only in CM, but absent in  
688 non-CM. Specific markers were used for the different cell types: *PDGFRA* for cardiac fibroblast (hCF),  
689 *TAGLN* for smooth muscle cells (hCASMC), *MYL2* and *MYH7* for hESC-CM and *CDH5* for endothelial  
690 cells (hCAEC). Data are represented as mean  $\pm$  s.e.m., n=3. \*\*  $p$ -value  $< 0.01$ . Student's t-test.

691

692 **Figure 3. CRISPR-mediated *VENTHEART* deletion results in impaired CM specification.** (A),  
693 Schematic showing CRISPR/eSpCas-9-mediated *VHRT* knockout (KO). First hESC KO line (*VHRT*  
694 KO #1) was generating using sgRNA\_2 and sgRNA\_4, and the second (*VHRT* KO #2) using sgRNA\_6  
695 and sgRNA\_10. (B), RT-qPCR validating loss of *VHRT* expression in *VHRT* KO #1 and #2. Expression  
696 is represented as fold change relative to wild type (WT). (C), Significant downregulated expression of  
697 cardiac genes *MYH7*, *MYL2* and *ATP2A2* in W12 *VHRT* KO cells. (D), Representative immunostainig  
698 showing sarcomere disorganization for *VHRT* KO #1 and #2, compared to WT in W12 hES-CM. (E-  
699 G), Distribution of gene expression log fold change (logFC), comparing between GFP+ cells in WT  
700 and *VHRT* KO #1 for W02 (E), W06 (F) and W12 (G). Differentially expressed (DE) genes at each  
701 time point are highlighted in dark-grey. Non-DE genes in light-grey. Highlighted in blue are cardiac  
702 development and maturation genes from the “midstage” module in Figure 1D, significantly  
703 downregulated in W12. Orange are ectoderm and neuronal genes, significantly upregulated in W12.  
704 Data are represented as expression fold change  $\pm$  s.e.m., n=3. \*\*  $p$ - value  $< 0.01$ , \*\*\* $p$ - value  $< 0.001$ ,  
705 n.s.: not significant. Student's paired t-test with a two-tailed distribution.

706

707 **Figure 4. *VENTHEART* knockdown decreases core cardiac gene expression and disrupts CM**  
708 **function.** (A), Schematic showing targeting GapmeRs. (B), RT-qPCR validation for *VHRT* knockdown  
709 (KD) in W06 hESC-CM, transfected with GapmeR#1 (n=5), GapmeR#2 (n=3) or GapmeR non-  
710 targeting control (CTR, n=5), and harvested for analysis after 4 days. (C), Volcano plot showing DE  
711 genes for *VHRT* GapmR#1 (left panel) and *VHRT* GapmeR#2 (right panel). Highlighted in red are

712 significant DE genes. Non-DE genes are marked in grey. In black are annotated cardiac contraction,  
713 calcium signaling and cardiac development genes significantly downregulated by *VHRT* KD. **(D)**,  
714 Histogram showing top biological process downregulated after *VHRT* GapmeR-mediated KD. **(E)**,  
715 Significant downregulation of calcium handling genes *RYR2*, *SLC8A1* and validated by RT-qPCR.  
716 Expression are shown as relative expression to control (CTR). n=3 biological replicates. \* $p \leq 0.05$ , \*\*  
717  $p \leq 0.01$  and \*\*\* $p \leq 0.001$ . Student's paired t-test with a two-tailed distribution. **(F)**, Immunostainig  
718 showing reduced ryanodine receptor 2 (RYR2) protein expression in *VHRT* GapmeR#1 KD and #2 KD,  
719 compared to CTR, in W06 hES-CM. **(G)**, Impedance-based contractility profile analysed using the  
720 CardioExcyte (Nanon). Reduction in relaxation velocity, upstroke velocity, amplitude and prolonged  
721 pulse width were observed for *VHRT* siRNA, similar to *ATP2A2* siRNA as positive control.

722

723 **Figure 5. Genetic evidence of a role for *VENTHEART* in heart disease.** **(A)**, LocusZoom<sup>54</sup> of 1-MB  
724 genomic region harbouring *VHRT* depicting significant *VHRT* cis-*eQTL* SNPs in heart left ventricle  
725 (HLV). **(B)**, SNPs associated with coronary artery disease (CAD), myocardial infarction (MI), non-  
726 ischemic HF and atrial fibrillation (AF) from published GWAS<sup>27-31</sup>. A tightly linked cluster of SNPs  
727 ( $r^2 > 0.8$ ) located at and near the *VHRT* locus shows suggestive association with HF ( $P$ -value  $< 5e-5$ ).  
728 The same SNPs are significantly associated with *VHRT*, but not *MYL2*, cardiac expression suggesting  
729 that *VHRT* rather than *MYL2* is the likely mediator of the observed cardiac disease GWAS signals. **(C)**,  
730 *VHRT* in cardiac muscle contraction and disease based on co-expression gene network analysis using  
731 RNA-seq data from 31,499 human samples<sup>30</sup>.  $P$ -value  $< 0.05$ , Wilcoxon Rank-Sum Test. **(D)**,  
732 Decreased *VHRT* expression in idiopathic dilated cardiomyopathic failing hearts, compared to healthy  
733 controls, based on a re-analysis of microarray data from GEO study GSE1145<sup>31</sup>. Benjamini-Hochberg  
734 adjusted  $P$ -value  $< 0.05$  from univariate analysis with moderated t-statistic using the R limma package,  
735 R v3.2 and limma v3.26.0.

736

737 **Figure 6. Transcriptome comparison of *VHRT* KD and human failing hearts proposes the gene**  
738 **program mechanism for disease causality.** **(A)**, Heatmap comparing *VHRT* KD DE genes with genes

739 that are differentially expressed in a panel of DCM failing hearts (GSE141910) (adjusted  $P$ -  
740 value $<0.05$ ). **(B)**, KEGG pathway and (c) Gene Ontology analysis by Enrichr<sup>32</sup> ( $\log_{10}$  (p-value)  $\geq 1.3$ ,  
741  $p$ -value  $\leq 0.05$ ) identifies cardiac contractile and calcium regulatory genes consistently downregulated  
742 in *VHRT* KD and DCM (“Down/Down”).

## **DETAILED MATERIAL AND METHODS**

### **Stem cell maintenance and differentiation**

Human embryonic stem cell line H1 was maintained using mTeSR medium (Stemcell Technologies, 85850) on 1:200 growth factor-reduced Geltrex (Thermo fisher, A1413202) coated tissue culture plates and passaged regularly as cell aggregates every 4-5 days using ReLeSR (Stemcell Technologies, 05872), an enzyme-free dissociation reagent specific for human pluripotent stem cells). Two days prior to starting differentiation, cells were dissociated using Accutase (Stemcell Technologies, 07922) and seeded as single cells in Geltrex-coated 12-well plates (passage ratio 1:2, between 500'000-600'000 cells). Differentiation was performed following the published protocol by Lian et al.<sup>21</sup> with modifications as follows. 10  $\mu$ M of CHIR99021 (Stemcell Technologies, 72054) was added on day 0 and left for 24 hours followed by medium change. On day 3, 5 $\mu$ M IWP2 (Sigma Aldrich, I0536) was added using 50/50 mix of new fresh medium and conditioned medium collected from each well and left for 48 hours. Culture medium from day 0 until day 7 was RPMI1640 (HyClone, SH30027.01) plus B-27 serum-free supplement without insulin (Gibco, A1895601). From day 7 and onwards RPMI1640 with B-27 serum free supplement with insulin (Gibco, 17504044) was used and changed every 2-3 days.

### **Generation of *MYH6*-GFP reporter line**

EGFP cassette with kanamycin selection was inserted into BACs for *MYH6* (RP11-834J17, BacPac) immediately before the initiating Methionine (ATG) using recombineering (Quick & Easy BAC Modification Kit, KD-001, Gene Bridges GmbH). The Tol2 transposon cassette with Ampicilin selection mark was inserted into the loxp site of the BAC in the backbone using recombineering. Ten million H1 cells were cultured in CF1 conditioned medium (20% KO serum replacement, 1 mM l-glutamine, 1% non-essential amino acids, 0.1 mM 2-mercaptoethanol and 8 ng ml<sup>-1</sup> of basic fibroblast growth factor in DMEM:F12) for 6 days and dissociated into single cells with TrypLE™ Express (Thermo Fisher, 12604021) and electroporated with 20 micrograms of Tol2 transposes and 100 micrograms of Tol2/EGFP modified Transposon-BACs. After electroporation, cells were re-suspended in conditioned medium with

10  $\mu$ M ROCK inhibitor Y276329 (Y27632 (Stemcell technology, 72302). ROCK inhibitor was added for the first 48 hours after electroporation. Fifty  $\mu$ g/ml geneticin (Gibco, 10131035) was added for selection of positive clones 72 hours post-electroporation. Fourteen days later after drug selection, single colonies were picked into 24 well plates for expansion. Fluorescent *in situ* hybridization (FISH) using non-modified BACs as probes was carried out to validate the incorporation of BAC construct into genome of ES cells (Cytogenetics Services, Genome Institute of Singapore). Karyotyping was performed to confirm a normal chromosome pattern.

### **Tri-lineage differentiation**

STEMdiff™ Trilineage Differentiation Kit (Stemcell Technologies, 05230) was used to differentiate hESC-MYH6 reporter into the three germ layers: ectoderm (*NESTIN* and *PAX6*), mesoderm (*TBXT* and *CXCR4*) and endoderm (*SOX17*, *FOXA2* and *CXCR4*) following manufacturer's instructions. Differentiation was performed on a 24-well plate. At the end of the differentiation RNA was extracted and RTqPCR was run for respective lineage markers.

### **Immunofluorescent staining**

Cells were fixed in 3.7% formaldehyde for 15 min at room temperature and stored in DPBS. They were permeabilized in 0.2% Triton X-100 for 15 min followed by a pre-blocking step with 2% BSA for 20 min. Primary antibody incubation was performed in DPBS + 10% goat serum (except for Nkx2.5 for which donkey serum was used) overnight at 4 degree and secondary antibody incubation for 2 hours at room temperature. DAPI was included during the final washing step. Antibodies used were cardiac troponin T (Lab Vision, ms-295-P0, mouse, 1:500 dilution),  $\alpha$ -actinin (Sigma Aldrich, A7811, mouse, 1:1000 dilution), Nkx2.5 (Santa Cruz, sc-8697, goat, 1:200 dilution), MLC2v (ProteinTech, 10906-1-AP, rabbit, 1:200 dilution), ryanodine receptor (Thermo Fisher, MA3-925, mouse, 1:200), alexa fluor 594 goat-anti-mouse (Thermo Fisher, A-11020), alexa fluor 546 goat-anti-rabbit (Thermo Fisher, A-1107), alexa fluor

647 mouse-anti-goat (Thermo Fisher, A-21237). To improve signal and avoid unspecific binding, MLC2v was stained using cells that were fixed in ice cold methanol for 5 mins at 4 °C.

### **RNA and DNA isolation**

RNA was extracted using Direct-zol™ RNA MiniPrep Kit (Zymo, R2060). Cells were directly lysed using Trizol reagent (Thermo Fisher, 15596026). DNA was purified using PureLink Genomic DNA Mini Kit (Thermo Fisher, K182001). All experiments were performed following the manufacturer's instructions.

### **PCR and reverse transcription quantitative PCR (RT-qPCR)**

DNA or plasmid vector were PCR amplified using Q5 High-Fidelity 2X Master Mix (Bio Labs, M0492S) and target specific primers (IDT) following manufacturer's instructions. RNA (50-500 ng) was reverse transcribed to cDNA using qScript Flex cDNA Kit (Quantabio, 95049-025) with a combination of random primers and oligo (dT). The remaining cDNA (1:10) was mixed with PerfeCTa SYBR Green FastMix, low ROX (Quantabio, 95074-05K) and specific primers on a 384-well plate. Real time qPCR was run using ViiA 7 Real-Time PCR System (Thermo Fisher). Average Cq was recorded and  $\Delta\Delta Cq$  method was used to calculate relative gene expression changes. Expression levels of genes were normalized against two housekeeping genes, *GAPDH* and *PPIA*. List of primers and sequences used in this study are listed on **Supplementary Table 11**.

### **Single cells RNA-seq**

#### ***Single cell preparation and cDNA preparation for RNA-seq***

hESC-CM were dissociated into less dense monolayers > 3 days prior to RNA isolation by pre-treatment with 1 mg/ml collagenase IV for 1 hour at 37 °C followed by 5 minutes treatment with Accutase (Stemcell Technologies, 07922). Immediately prior to single cell capture, cells were dissociated using Accutase (Stemcell Technologies, 07922) for 4-5 minutes at 37 °C and re-suspended with a P1000 pipette to facilitate proper single cell formation. Cells were filtered using a 40  $\mu$ M filter and kept in suspension in RPMI1640

with B-27 supplement and 5  $\mu$ M ROCK inhibitor Y276329 (Stemcell technologies, 72302) inhibitor on ice and counted using the TC20 automated cell counter from Biorad. The cell size ranged between 16-22  $\mu$ M and cell viability was above 95%. Fluidigm microfluidic C1 system was used for automated cell capture, conversion of polyA<sup>+</sup> RNA into cDNA and a universal amplification step. After priming of the chip following Fluidigm manual, cells were loaded onto large sized C1 IFC chips (Fluidigm, 100-5761) at a concentration of 400 cells/ $\mu$ l (total volume of 20  $\mu$ l with a 3:2 ratio of cell suspension:C1 suspension reagent). The mRNA Seq: Cell Load script was run followed by manual inspection to assess cell capture success. Pictures were taken from all 96 capture sites and a note was made whether 0, 1 or more cells were captured per site and if the captured cell was GFP negative or positive. Cell lysis, reverse transcription and PCR amplification was run overnight (using reagents from the SMARTer Ultra Low RNA Kit from ClonTech, 634833) and the cDNA products harvested and diluted in 10  $\mu$ l of C1 DNA Dilution Reagent (from the C1 Reagent Kit for mRNA seq from Fluidigm, 100-6201) the next morning.

#### ***Library preparation and Quality Control***

cDNA concentration was measured using the Quant-iT™ PicoGreen® dsDNA Assay Kit (LifeTech, P11496) and ranged from 0.1-1 ng/ $\mu$ l per cell. 3 $\mu$ l of cDNA was used for library preparation with the Nextera XT DNA Sample Preparation Kit (Illumina, FC-131-1096). Each library was barcoded and multiplexed 15 libraries into one sequencing lane. A total of 71 GFP positive (CM) and 31 GFP negative (non-CM) cells were sequenced on an Illumina HiSeq 2000 sequencer in 4 different sequencing runs. From the 71 GFP positive cells, 4 were duplicated in one run to control for technical variability. 3 samples (one from each time point) that were first ran in individual runs were subsequently re-sequenced together in the fourth run to control for batch effects. Three samples (one from each time point) also underwent a new round of library preparation and were sequenced together with the original library prepared sample to assess the influence of the library preparation step on the outcome.

#### ***Raw reads filtering, alignment, quality control and gene expression estimation***

Illumina CASAVA version 1.8.2 was used to perform demultiplexing and generate FASTQ file. Quality of sequencing reads was examined with FASTQC<sup>1</sup>. Paired-end reads were aligned to human genome (*Homo*



*Sapiens*) hg19 assembly using state-of-the-art mapping tool, Tophat2<sup>2</sup> (version 2.0.11.Linux\_x86\_64) with Bowtie2 (version 2.2.1.0). The parameters that were set for Tophat2 alignment were `--min-anchor 8`, `--splice-mismatches 1`, `--min-intron-length 50`, `--max-intron-length 500000`, `--min-isoform-fraction 0.15`, `--max-multihits 1`, `--segment-length 25`, `--segment-mismatches 2`, `--min-coverage-intron 50`, `--max-coverage-intron 20000`, `--min-segment-intron 50`, `--max-segment-intron 50000`, `--read-mismatches 3`, `--read-gap-length 3`, `--read-edit-dist 3`, `--read-realign-edit-dist 0`, `--max-insertion-length 3`, `--max-deletion-length 3`, `--mate-inner-dist 200`, `--mate-std-dev 20`, `--no-coverage-search` and `--library-type fr-unstranded`. We also supplied Tophat2 with hg19 GENCODE (version 19) transcriptome annotation to Tophat2 with `-G` option. RSeQC (RNA-seq Quality Control Package version 2.6.1) was used to inspect sequence quality, transcript integrity number (TIN) which is analogous to RIN (RNA integrity number), duplication rate and mapped reads distribution<sup>3</sup>. Reads mapped to mitochondrial genes and ribosomal genes were also calculated using htseq-count (version 0.6.0).

Cuffdiff (version 2.2.1, with boost version 104700) was used to compute relative gene expression level in human genome (hg19) GENCODE (version 19) transcriptome annotating `tf` file with parameters: `--library-norm-method classic-fpkm`, `--compatible-hits-norm`, `--frag-bias-correct` and `--max-frag-multihits 1`. Ribosomal RNA and tRNA were masked in the gene expression level calculation. Gene expression level was reported in fragments per kilobase per million mapped reads (FPKM)<sup>4</sup>. We assumed genes with FPKM lower than 1 to be non-expressing. Only genes expressed with  $\text{FPKM} \geq 1$  in at least 2 samples were considered for downstream analyses.

### ***Saturation Analysis***

Using samtools version 0.1.19, saturation analysis was performed by randomly subsampling different number of reads from each sample, and re-calculating gene FPKM. The process of subsampling was repeated until there were at least 5 subsampled datasets per point, at library size of (0.1M, 0.5M, 1M, 2M, 3M, 4M, 5M). For each point, the average number of genes with FPKM greater than or equal to 1 was plotted.

*Network construction and module detection using R package Weighted Correlation Gene Network Analysis (WCGNA).*

Using WCGNA, we constructed a signed weighted correlation network by computing pairwise correlations,  $s$  between all genes across all single-cell RNA-seq samples<sup>5</sup>. Next, we chose soft thresholding power ( $\beta=3$ ), in constructing an adjacency matrix using the formula,  $a_{ij} = (0.5 + 0.5 \times s_{ij})^\beta$ , where  $a_{ij}$  is defined as weighted correlation and  $s_{ij}$  is defined coefficient correlation between  $gene_i$  and  $gene_j$ . We choose the power ( $\beta=3$ ), which was the lowest power for which the scale-free topology fit index curve flattens out upon reaching a high value of 0.98. Using the adjacency matrix computed in the previous step, topological overlap was calculated to measure the network interconnectedness in a robust and biological meaningful way. The topological overlap was utilized to group highly correlated genes together using average linkage hierarchical clustering.

Modules were defined as the branches obtained by cutting the hierarchal tree using Dynamic Hybrid Tree Cut algorithm<sup>6</sup>. We defined the first principle component of a module as module eigengene, which was representative of the expression profile in each module. Genes in each module were removed if the correlation between the gene and module eigengene (kME) was less than 0.3. If a detected module did not have at least 30 genes with eigengene connectivity (kME) at least 0.5, the module was disbanded and its genes were unlabeled and returned to the pool of genes waiting for module detection. Modules whose eigengenes were highly correlated (correlation above 0.75) were merged. Construction of signed gene network and identification of modules was performed using R function, blockwise Modules with following parameters: soft thresholding power = 3, minimum module size = 30, mergeCutHeight = 0.25, corType = "Pearson", networkType = "signed", TOMType = "signed", minCoreKME = 0.5, minKMEtoStay = 0.3.

To identify modules that were significantly correlating with subgroups, we computed correlation of eigengenes of each module with cells in W02, W06 and W12. We picked modules which showed high correlation with each week and sub-population of cells for W12. In addition, we also computed Gene Significance (GS), which was defined as the correlation of each gene with each group of interest<sup>5</sup>. We also

calculated module membership, which was defined as the correlation between module eigengene and gene expression profile. GS and MM were important because it helped in the identification of genes with high significance for each week of development and high module membership in each week-/subtype-specific modules. Module membership was reported to be highly correlated to the intramodular connectivity,  $k_{ME}$ . Highly connected intramodular hub genes was observed to have high module membership values to the respective module.

### **Bulk RNA seq analysis**

Total RNA sequencing was performed using Truseq Stranded Total RNA Library Prep kit (Illumina, RS-122-2201), which uses Ribo-Zero to remove cytoplasmic rRNA from total RNA. Remaining intact RNA is fragmented using a chemical mix, followed by first- and second-strand cDNA synthesis using random hexamer primers. “End-repaired” fragments were ligated with unique Illumina adapters. All individually indexed samples were subsequently pooled together and multiplexed for sequencing. Libraries were sequenced using the Illumina HiSeq 2000 sequencing system and paired-end 101 bp reads were generated for analysis. Quality control, gene alignment and gene expression estimation were performed as described in the single cell sequencing method.

### **GWAS and eQTL analysis and statistics**

Genome-wide association studies (GWAS) summary statistics were accessed from the Cardiovascular Disease Knowledge Portal (CVDKP)<sup>7</sup>, and included the following data sets: All-cause Heart Failure and Nonischemic Cardiomyopathy HRC GWAS in UK Biobank (394156 samples, European ancestry)<sup>8</sup>, CARDIoGRAMplusC4D GWAS (184305 samples, mixed ancestry)<sup>9</sup>, CAD exome chip analysis (120575 samples, mixed ancestry)<sup>10</sup> and 2018 AF HRC GWAS (588190 samples, mixed ancestry)<sup>11</sup>. Significant VHRT cis-eQTLs (FDR<0.05, +/- 1Mb window around the VHRT TSS) precalculated from genotype and RNA sequencing data from human heart left ventricular samples (n=386) were extracted from the Genotype-Tissue Expression (GTEx) Portal<sup>12</sup>. VHRT locus plots depicting GWAS and eQTL data were

created using LocusZoom<sup>13</sup> on genome build GRCh37/hg19 and LD population 1000 Genomes Phase 3, EUR.

### **Cross-interrogation of *VHRT* KD transcriptome with human DCM date sets**

Significant DE genes in GapmeR#1 *VHRT* KD and GapmeR#2 *VHRT* KD vs CTRL (N=1,100; 573 down- and 527 upregulated at adjP-value<0.05, FC>|0.5| in both) were compared with public DCM transcriptomics study (GEO accession: GSE141910). This study comprises RNA sequencing datasets of 61 left ventricle explants (Idiopathic Dilated Cardiomyopathy and Non-Failing) from the MAGNet study (Myocardial Applied Genomics Network). Differential expression analysis was conducted on the DCM versus control samples using R package EdgeR, which applies generalized linear models (glm) on normalized RNA-seq gene count. Enrichment for pathway and molecular functions was then performed on the DE subgroup based on functional analysis using Enricher tools<sup>14</sup>.

### ***VHRT* CRISPR/Cas9 knockout**

Plasmid pMIA3 (Addgene plasmid # 109399; <http://n2t.net/addgene:109399>; RRID: Addgene\_109399) was used for CRISPR/Cas9 mediated KO. pMIA3 was generated and previously described by Dr. Matias Autio<sup>15</sup>. Two KO hESC lines were generated using dual single guide RNA (sgRNAs) to remove part of *VHRT*. Single guide RNA sequence were designed using cloud based software tools for digital DNA sequence editing Benchling<sup>16</sup> and CRISPOR<sup>17,18</sup>. Schematic representation of the pairs of sgRNAs and genomic regions to be removed are shown in the figure 5A. 10  $\mu$ M sense and anti-sense oligonucleotides were ordered (**Supplemental Table 11**) and annealed to generate the 20 nucleotide spacer that defines the genomic target to be modified (*VHRT* 5'end and 3'end). pMIA3 was digested with BsmBI and sgRNA spacers cloned after human U6 promoter with T4 DNA ligase (New England Biolabs) following manufacturer's instruction. Ligated constructs underwent transformation using RapidTrans<sup>TM</sup> Chemically Competent Cells (Active motif). Plasmid was extracted from bacterial culture, purified and Sanger sequenced to confirm successful cloning. Prior to hESC targeting, cutting efficiency of pMIA3-sgRNAs

plasmids were tested on HEK293T using the EGxxFP plasmid (pCAG-EGxxFP was a gift from Masahito Ikawa, Addgene plasmid # 50716). Best combination of sgRNAs was then used for final targeting of hESCs. The best pair of guides were cloned into a single pMIA3 plasmid digested with NheI & XbaI, using NEBuilder isothermal assembly (New England Biolabs), according to manufacturer's instructions to make the final pMIA3 dual sgRNA plasmid. Primers for isothermal assembly are listed on **Supplemental Table 11**. Human ESCs were dissociated with Accutase (Stemcell Technologies, 07922) and  $\sim 1.5 \times 10^6$  cells were re-suspended in 100  $\mu$ l P3 Primary Cell kit solution from Lonza (V4XP-3024) and mixed with 10  $\mu$ g pMIA3dual sgRNA plasmid. To transfect hESC, nucleofection was performed using program CM-113 on the 4D-Nucleofector System (Lonza). Cells were then plated into Geltrex coated 6-well plate with mTeSR medium (Stemcell Technologies, 85850) containing 5  $\mu$ M Y-27632. After 2 days in culture, cells were dissociated, FACS sorted for RFP positive cells and collected into a tube containing TeSR medium (Stemcell Technologies, 85850) with 5  $\mu$ M Y-27632. 500 to 2000 cells were plated into wells of 6-well plate containing the above media. Single cell clones were monitored and upon sizeable growth, colonies were picked and passaged. Genomic DNA was extracted for genotyping and screened for successful KO. Location of primer pairs used for the genotyping are represented in **Supplemental Figure 7A-C** and primer sequences are listed in **Supplemental Table 11**. RT-qPCR was performed to validated KD of *VHRT* transcript.

### **Cellular fractionation**

An average of  $10^7$  hESC-CMs were dissociated into single cell suspension as described above. RNA was extracted from nuclear and cytoplasmic fractions using a rapid, phenol-free, small scale protein and RNA isolation system PARIS kit (Thermo Fisher, AM1921) following manufacturer's instructions. During the fractionation procedure, Trypan blue solution was used to monitor proper separation of the cytoplasmic and nuclear fractions (**Supplemental Figure 5B**). To remove traces of genomic DNA, eluted RNA was treated with DNA-free<sup>TM</sup> DNase Treatment and Removal Reagents (Thermo Fisher, AM1906) following manufacturer's instructions. RNA concentration and purity were measured using NanoDrop. An Agilent

RNA 6000 Pico kit (5067-1513) was run to observe the RIN value, distribution and intensity of the signal of all RNAs, up to about 7000 nt, hence including the distinctive peak for tRNA, 18S and 28S. *VHRT* compartmentalization was detected with RT-qPCR along with cytoplasmic markers (*GAPDH* and 18S ribosomal RNA) and nuclear markers (*U6* and *MALAT1*).

### ***In-vitro* translation**

Protein coding potential was assessed via web-based prediction algorithm (CPC: coding potential calculator). An open reading frame (ORF) was identified on *VHRT* isoform 6. 1x FLAG Tag (motif: DYKDDDDK) was inserted either at N-terminus (after the START codon) or the C-terminus (before STOP codon) of the ORF. Plasmids were transfected in HEK293T cells. Successful transfection was confirmed using a plasmid control containing sequence for blue fluorescent protein (BFP: ~29 kDa) tagged with FLAG at the C-terminus. 48 h after transfection, cells were lysed for protein extraction and Western blot. Protein analysis was performed using pre-casted gradient gel 4-20% mini-PROTEAN TGX Stain-Free (Bio-rad, 4568096). 10 to 100 µg of protein was loaded onto the gels alongside a protein ladder (1st Base, Asia). The electrophoresis setting for initial running for 20 mins at 50 V and subsequently 100 V for 60-90 mins. The running buffer contained 25 mM Tris base, 192 mM glycine and 0.1 % SDS. Protein transfer was performed on 0.22 µm polyvinylidene difluoride (PVDF, BioRad, 1620260) membrane at 100 V for 1 h in transfer buffer (25 mM Tris base, 192 mM glycine, 20 % methanol). After transfer, the membrane was blocked in 5 % BSA/TBS-T (20 mM Tris-HCl pH 7.6, 140 mM NaCl supplemented with 0.1 % Tween 20, Merck, P1379) for 1 h on a rocking platform at room temperature (RT). Membranes were subsequently incubated with primary anti- mouse FLAG antibody (Sigma Aldrich, B3111) diluted in 5 % BSA/T-BST blocking buffer overnight at 4°C. Membranes were washed 3 times in TBS-T for 5 min. Horse radish peroxidase (HRP)-conjugated secondary antibody (Thermo Fisher, MA5-15367) was diluted in 5 % BSA/T-BST at 1:10 000 dilution and added to the membrane for 1h at RT. After membranes washing with TBS-T, chemiluminescence solution (West Femto, Thermo Fisher, 32106) was added to the membrane following the manufacturer's instructions and exposed to chemidoc (Biorad) for protein exposure.

## **Human heart tissue collection**

Gene expression level was assessed by qPCR from explanted hearts of patients undergoing transplantation for end-stage heart failure. All donors provided written informed consent and samples were fully anonymized. 30-60 mg of cardiac tissue (Ventricle Tissue, VT and Atrial Tissue, AT) were mechanically powdered on liquid nitrogen and further disrupted in 350  $\mu$ l RLT buffer at room temperature using a Tissue Lyzer device (Qiagen, Hilden, Germany; 2 min, 30 Hz). DNA extraction was performed with the RNeasy Plus kit (Qiagen) according to the manufacturer's instructions. 100-250 ng of RNA were reversely transcribed with the High Capacity cDNA Reverse Transcription kit (Applied Biosystems). qPCR was carried out on an ABI Prism 7900 HT Sequence Detection System (Applied Biosystems). Transcript abundance was calculated using the the delta-delta-CT method with GAPDH as reference transcript.

## **VHRT knockdown**

### ***GapmeR transfection***

Anti-sense LNA - GapmeR –based technology (Qiagen) was used for gene KD. With the use of a web-based algorithm provided by Qiagen, GapmeRs were designed to target *VHRT* transcript (RP1-46F2.2, hg19 or LINC01405, hg38). 100 nM of each GapmeR was transfected using 6  $\mu$ l Lipofectamine 2000 reagent (Invitrogen, 11668030) in a total volume of 1mL hESC-CM media (RPMI 1640 with B27 supplement with insulin, Thermo Fisher Scientific, A1895601) in a 12-well plate with 85-90% cell confluency (n= 4 biological replicates). Negative A–GapmeR was transfected as negative control. Sequence of GapmeRs are listed in **Supplemental Table 11**.

Fresh and new media was replaced after 48 h. Day 4 after transfection, RNA was purified and relative expression of *VHRT* and other important cardiac genes (*MYH6*, *MYH7*, *RYR2*, *ATP2A2*, *SCN5A* and *PLN*) were assayed via RT-qPCR in each group. Expression levels were normalized to housekeeping genes *GAPDH* and *PPIA*. % KD was calculated relative to Negative A-GapmeR and genes that had significant changes in expression ( $p$ -value  $\leq 0.05$ , Student's t test) were considered statistically significant.

### ***SiRNA transfection***

*In-vitro* iCell cardiomyocytes (CDI, 01434) were maintained in culture according manufacturer instruction. SiRNA for *VHRT* was purchased from Ribxxx life science (lot 2017d0113) and for *ATP2A2* from Dharmacon (ON TARGETplus SMARTpool siRNA). They were dissolved in H<sub>2</sub>O to a stock concentration of 10 μM. 10 nM siRNA was transfected using 0.1 uL Lipofectamine RNAiMax per well. Media was changed after 24h and cells were used in the corresponding assay after 72h. RNA was extracted using the RNeasy micro kit (Qiagen, 74004) in the Qiacube instrument. cDNA was prepared using reverse transcription according to High-Capacity RNA-to-cDNA™ Kit (Thermo Fisher, 4387406). qPCR was performed using TaqMan Fast Advanced Master mix (Thermo Fisher) together with specific gene expression assays Hs04405003\_m1 (*RPI-46F2.2*) and housekeeping gene (*GAPDH*). Quantitative RT-PCR was performed with QuantStudio™ 7 Flex Real-Time PCR instrument (Thermo Fisher) and data was recorded during 40 PCR cycles and normalized against untreated samples. Sequence of siRNAs are listed in **Supplemental Table 11**.

### **Fluorescence-activated cell sorting (FACS) of hESC-CM**

Cells were sorted using BD FACSAria II 5 laser from Flow Cytometry Core or (A\*STAR, Singapore Immunology Network). Prior dissociation, cells were cultured with corresponding media containing 5uM ROCK inhibitor (Y27632, Stemcell Technologies, 72302) for 30 min at 37°C. Media was aspirated and cells were treated with Accutase (Stemcell Technologies, 07922) (1mg/mL) for 5-8 min at 37°C. For hESCs, Accutase (Stemcell Technologies, 07922) was neutralized using mTeSR medium (Stemcell Technologies, 85850) whereas passaging media was used for hESC-CMs. Cells were collected in 15 ml tube and spin at 300 g for 5 min. Human ESC were re-suspended in DPBS and hESC-CMs in FACS buffer (DPBS w/o Ca and w/o Mg, 2% HI-FB, 11550356, + 1mM EDTA, 5uM Y27632) and pipetted through 40 um cell strainer to avoid cell clumps. Due to their increase in cell size over time, older hESC-CMs were pipetted through a 70um cell strainer instead. During FACS, cells were collected in 2mL tube containing



corresponding media and re-plated on a new coated plate (1:200 Geltrex, if hESC or 0.1% gelatin, if hESC-CM). To avoid contamination 100x Penicillin-Streptomycin mixture was added at each step and sample were kept on ice at all time to reduce cell death.

## **Electrophysiological assays**

### *Multielectrode array recordings*

MEA chips were coated with 0.1% gelatin and hESC-CM (8 weeks after differentiation) were seeded on the chip at least 4 days prior to the recording to allow for proper attachment and coupling. Field potentials were recorded from spontaneously beating cells using a USB-MEA60-Up-BC-System (Multichannel systems) and analyzed using MC\_Rack. Recordings were made in regular RPMI-1640 (Thermo Fisher, 11875093) +B-27 supplement media (Thermo Fisher, A3582801) with or without the addition of 100  $\mu$ M noradrenaline.

### *Contractility and electrophysiology recordings*

The Cardioexcyte 96 instrument (Nanon) was used to record and analyze impedance-based contractility. The stim plates were coated with fibronectin for >1h in the incubator. iCell cardiomyocytes (01434 from CDI) were thawed and plated at 20k cells/well following recommendation from the manufacturer. Experiments were performed from day 12 post-plating and onwards. At least 5 replicates were used for each condition. *ATP2A2* was used as positive control and non-targeted siRNA as well as untreated cells as negative controls. Readings for base impedance were measured before and after treatment with siRNAs, both for spontaneously beating and electrically paced cells. The data was analyzed using the data control software from Nanion. One-way ANOVA, multiple comparisons, compared to control siRNA.

### *Action potential (AP) recordings*

Whole cell configuration of the patch-clamp technique was used to measure AP on two different groups of cells, Negative A-GapmeR and *VHRT* KD GapmeR. Both groups were co-transfected with BLOCK-iT™

Alexa Fluor<sup>®</sup> Red Fluorescent Control (Invitrogen), therefore only cells marked in red and green (*MYH6*-GFP reporter) were used to record AP. The signal was amplified using an axon 700B patch clamp amplifier (axon instrument, Sunnyvale, USA) and low-pass filtered at 5 kHz. Patch pipettes were fabricated from glass capillaries (O.D, 1.5mm; I.D, 0.9mm) using a Sutter P-97 microelectrode puller (Novato, CA, USA ) and the tips were heat polished with a microforge (NARISHIGE MF-900) to gain a resistance of 2-4 M $\Omega$ . The electrical signals were sampled at 2.5-10 kHz and filtered at 2 kHz using a low-pass filter. Data acquisition was achieved using the Digidata 1440A (axon instrument). Data analysis and fit were performed using clamp fit 10.2 (axon instrument) and Origin 7.0 software (Origin Lab Corporation). A pClamp software (Version8.1; Axcon Instrument) was used to generate voltage-pulse protocols, acquire and analyze data. APs were recorded under current-clamp mode at 35 °C. Pipette solution contained (in mM): KCl 130, NaCl 5, MgCl<sub>2</sub> 1, MgATP 3, EGTA 10, and HEPES 10, with pH adjusted to 7.2 with KOH. Extracellular solution (Tyrode's solution) containing contained (in mM) NaCl 140, KCl 5.4, CaCl<sub>2</sub> 1.8, MgCl<sub>2</sub> 1, glucose 10, HEPES 10, with pH adjusted to 7.4 with NaOH. The parameters of APs include AP durations (APD) at 20%, 50% and 90% of repolarization (APD<sub>20</sub>, APD<sub>50</sub>, and APD<sub>90</sub>), AP amplitude (APA), maximal diastolic potential (MDP), and beating frequency (for spontaneous contractions) were analyzed.

## **Statistics**

Excluding the NGS seq results, all gene expression analysis was performed using Excel (Microsoft office). Unless stated otherwise, data are represented as mean  $\pm$  standard error of the mean (s.e.m). Statistical significance between two groups was done using student's t. P-values of  $\leq 0.05$  were considered as significant, unless otherwise indicated.

## **REFERENCES**

1. Anders S, Huber W. Differential expression analysis for sequence count data. *Genome Biol* [Internet]. 2010;11:R106. Available from: <https://www.ncbi.nlm.nih.gov/pubmed/20979621>

2. Kim D, Pertea G, Trapnell C, Pimentel H, Kelley R, Salzberg SL. TopHat2: accurate alignment of transcriptomes in the presence of insertions, deletions and gene fusions. *Genome Biol* [Internet]. 2013;14:R36. Available from: <https://www.ncbi.nlm.nih.gov/pubmed/23618408>
3. Wang JT, Li JT, Zhang XF, Sun XW. Transcriptome analysis reveals the time of the fourth round of genome duplication in common carp (*Cyprinus carpio*). *BMC Genomics* [Internet]. 2012;13:96. Available from: <https://www.ncbi.nlm.nih.gov/pubmed/22424280>
4. Trapnell C, Roberts A, Goff L, Pertea G, Kim D, Kelley DR, Pimentel H, Salzberg SL, Rinn JL, Pachter L. Differential gene and transcript expression analysis of RNA-seq experiments with TopHat and Cufflinks. *Nat Protoc* [Internet]. 2012;7:562–578. Available from: <https://www.ncbi.nlm.nih.gov/pubmed/22383036>
5. Langfelder P, Horvath S. WGCNA: an R package for weighted correlation network analysis. *BMC Bioinformatics* [Internet]. 2008;9:559. Available from: <https://www.ncbi.nlm.nih.gov/pubmed/19114008>
6. Langfelder P, Zhang B, Horvath S. Defining clusters from a hierarchical cluster tree: the Dynamic Tree Cut package for R. *Bioinformatics* [Internet]. 2008;24:719–720. Available from: <https://www.ncbi.nlm.nih.gov/pubmed/18024473>
7. Cardiovascular Disease Knowledge Portal [Internet]. Available from: <http://www.broadcvdi.org/>
8. Aragam KG, Chaffin M, Levinson RT, McDermott G, Choi SH, Shoemaker MB, Haas ME, Weng LC, Lindsay ME, Smith JG, Newton-Cheh C, Roden DM, London B, Wells QS, Ellinor PT, Kathiresan S, Lubitz SA. Phenotypic Refinement of Heart Failure in a National Biobank Facilitates Genetic Discovery. *Circulation*. 2019;
9. Nikpay M, Goel A, Won HH, Hall LM, Willenborg C, Kanoni S, Saleheen D, Kyriakou T, Nelson

- CP, CHopewell J, Webb TR, Zeng L, Dehghan A, Alver M, MArmasu S, Auro K, Bjornes A, Chasman DI, Chen S, Ford I, Franceschini N, Gieger C, Grace C, Gustafsson S, Huang J, Hwang SJ, Kim YK, Kleber ME, Lau KW, Lu X, Lu Y, Lyytikäinen LP, Mihailov E, Morrison AC, Pervjakova N, Qu L, Rose LM, Salfati E, Saxena R, Scholz M, Smith A V., Tikkanen E, Uitterlinden A, Yang X, Zhang W, Zhao W, De Andrade M, De Vries PS, Van Zuydam NR, Anand SS, Bertram L, Beutner F, Dedoussis G, Frossard P, Gauguier D, Goodall AH, Gottesman O, Haber M, Han BG, Huang J, Jalilzadeh S, Kessler T, König IR, Lannfelt L, Lieb W, Lind L, MLindgren C, Lokki ML, Magnusson PK, Mallick NH, Mehra N, Meitinger T, Memon FUR, Morris AP, Nieminen MS, Pedersen NL, Peters A, Rallidis LS, Rasheed A, Samuel M, Shah SH, Sinisalo J, EStirrup K, Trompet S, Wang L, Zaman KS, Ardissino D, Boerwinkle E, Borecki IB, Bottinger EP, Buring JE, Chambers JC, Collins R, Cupples L, Danesh J, Demuth I, Elosua R, Epstein SE, et al. A comprehensive 1000 Genomes-based genome-wide association meta-analysis of coronary artery disease. *Nat Genet.* 2015;
10. Stitzel NO, Stirrups KE, Masca NGD, Erdmann J, Ferrario PG, König IR, Weeke PE, Webb TR, Auer PL, Schick UM, Lu Y, Zhang H, Dube MP, Goel A, Farrall M, Peloso GM, Won HH, Do R, Van Iperen E, Kanoni S, Kruppa J, Mahajan A, Scott RA, Willenborg C, Braund PS, Van Capelleveen JC, Doney ASF, Donnelly LA, Asselta R, Merlini PA, Duga S, Marziliano N, Denny JC, Shaffer CM, El-Mokhtari NE, Franke A, Gottesman O, Heilmann S, Hengstenberg C, Hoffmann P, Holmen OL, Hveem K, Jansson JH, Jöckel KH, Kessler T, Kriebel J, Laugwitz KL, Marouli E, Martinelli N, McCarthy MI, Van Zuydam NR, Meisinger C, Esko T, Mihailov E, Escher SA, Alver M, Moebus S, Morris AD, Müller-Nurasyid M, Nikpay M, Olivieri O, Perreault LPL, AlQarawi A, Robertson NR, Akinsanya KO, Reilly DF, Vogt TF, Yin W, Asselbergs FW, Kooperberg C, Jackson RD, Stahl E, Strauch K, Varga T V., Waldenberger M, Zeng L, Kraja AT, Liu C, Ehret GB, Newton-Cheh C, Chasman DI, Chowdhury R, Ferrario M, Ford I, Jukema JW, Kee F, Kuulasmaa K, Nordestgaard BG, Perola M, Saleheen D, Sattar N, Surendran P, Tregouet

- D, Young R, Howson JMM, Butterworth AS, Danesh J, Ardissino D, et al. Coding variation in ANGPTL4, LPL, and SVEP1 and the risk of coronary disease. *N Engl J Med.* 2016;
11. Roselli C, Chaffin MD, Weng LC, Aeschbacher S, Ahlberg G, Albert CM, Almgren P, Alonso A, Anderson CD, Aragam KG, Arking DE, Barnard J, Bartz TM, Benjamin EJ, Bihlmeyer NA, Bis JC, Bloom HL, Boerwinkle E, Bottinger EB, Brody JA, Calkins H, Campbell A, Cappola TP, Carlquist J, Chasman DI, Chen LY, Chen YDI, Choi EK, Choi SH, Christophersen IE, Chung MK, Cole JW, Conen D, Cook J, Crijns HJ, Cutler MJ, Damrauer SM, Daniels BR, Darbar D, Delgado G, Denny JC, Dichgans M, Dörr M, Dudink EA, Dudley SC, Esa N, Esko T, Eskola M, Fatkin D, Felix SB, Ford I, Franco OH, Geelhoed B, Grewal RP, Gudnason V, Guo X, Gupta N, Gustafsson S, Gutmann R, Hamsten A, Harris TB, Hayward C, Heckbert SR, Hernesniemi J, Hocking LJ, Hofman A, Horimoto ARVR, Huang J, Huang PL, Huffman J, Ingelsson E, Ipek EG, Ito K, Jimenez-Conde J, Johnson R, Jukema JW, Kääb S, Kähönen M, Kamatani Y, Kane JP, Kastrati A, Kathiresan S, Katschnig-Winter P, Kavousi M, Kessler T, Kietselaer BL, Kirchhof P, Kleber ME, Knight S, Krieger JE, Kubo M, Launer LJ, Laurikka J, Lehtimäki T, Leineweber K, Lemaitre RN, Li M, Lim HE, et al. Multi-ethnic genome-wide association study for atrial fibrillation. *Nat Genet.* 2018;
  12. GTEx Portal [Internet]. [cited 2019 Nov 9]; Available from: <https://www.gtexportal.org/home/>
  13. Pruim RJ, Welch RP, Sanna S, Teslovich TM, Chines PS, Gliedt TP, Boehnke M, Abecasis GR, Willer CJ, Frishman D. LocusZoom: Regional visualization of genome-wide association scan results. In: *Bioinformatics.* 2011.
  14. Chen EY, Tan CM, Kou Y, Duan Q, Wang Z, Meirelles G V., Clark NR, Ma'ayan A. Enrichr: Interactive and collaborative HTML5 gene list enrichment analysis tool. *BMC Bioinformatics.* 2013;

15. Ang LT, Tan AKY, Autio MI, Goh SH, Choo SH, Lee KL, Tan J, Pan B, Lee JJH, Lum JJ, Lim CYY, Yeo IKX, Wong CJY, Liu M, Oh JLL, Chia CPL, Loh CH, Chen A, Chen Q, Weissman IL, Loh KM, Lim B. A Roadmap for Human Liver Differentiation from Pluripotent Stem Cells. *Cell Rep* [Internet]. 2018;22:2190–2205. Available from: [internal-pdf://113.214.84.44/1-s2.0-S2211124718301517-main.pdf](https://www.cell.com/cell-reports/pdf/S2211124718301517-main.pdf)
16. Cloud-Based Informatics Platform for Life Sciences R&D | Benchling [Internet]. [cited 2019 Dec 2]; Available from: <https://www.benchling.com/>
17. CRISPOR [Internet]. [cited 2019 Dec 2]; Available from: <http://crispor.tefor.net/crispor.py>
18. Concordet J-P, Haeussler M. CRISPOR: intuitive guide selection for CRISPR/Cas9 genome editing experiments and screens. *Nucleic Acids Res* [Internet]. 2018 [cited 2020 Jan 3];46:W242–W245. Available from: <https://academic.oup.com/nar/article/46/W1/W242/4995687>
19. Deelen P, van Dam S, Herkert JC, Karjalainen JM, Brugge H, Abbott KM, van Diemen CC, van der Zwaag PA, Gerkes EH, Zonneveld-Huijssoon E, Boer-Bergsma JJ, Folkertsma P, Gillett T, van der Velde KJ, Kanninga R, van den Akker PC, Jan SZ, Hoorntje ET, te Rijdt WP, Vos YJ, Jongbloed JDH, van Ravenswaaij-Arts CMA, Sinke R, Sikkema-Raddatz B, Kerstjens-Frederikse WS, Swertz MA, Franke L. Improving the diagnostic yield of exome-sequencing by predicting gene–phenotype associations using large-scale gene expression analysis. *Nat Commun*. 2019;
20. GEO Accession viewer [Internet]. [cited 2019 Dec 19]; Available from: <https://www.ncbi.nlm.nih.gov/geo/query/acc.cgi?acc=GSE1145>

## SUPPLEMENTARY FIGURE LEGENDS

### Supplementary Figure 1

(A), Karyotyping of the *MYH6*-GFP reporter cell line shows a normal karyotype. (B), FISH identified 1 signal incorporated on each allele of chromosome 14. (C), Immunofluorescence confirms protein expression of  $\alpha$ -actinin (ACTN1), cardiac troponin T (cTnT) and NKX2-5 in hESC-derived cardiomyocytes (CMs) indicating high differentiation efficiency. Striated patterns with ACTN1 and cTnT are typical for cardiac muscle. Overlap with GFP shows that all GFP positive cells expressed all three cardiac proteins. (D), A multielectrode array was used to record field potentials from hESC-CM under baseline conditions and upon administration of adrenergic stimulant noradrenaline. Physiological field potentials are as displayed showing that noradrenaline induced an increase in beating frequency, increased field potential amplitude and a shortening of the field potential duration.

### Supplementary Figure 2

(A), Single cells captured in the Fluidigm C1 microfluidic system. Top, GFP positive (GFP+) and bottom, GFP negative (GFP-) cells, respectively. (B), Saturation plot for all genes expressed at FPKM  $\geq 1$  shows that for all samples, the maximum number of expressed genes was attained by around 1 million sequencing reads. (C), Histogram showing the number of expressed genes (FPKM  $> 1$ ) detected in each single cell sample at the different time points. (D), Scatter plots for correlations between technical repeats show strong reproducibility and excludes any predominant effect of technical noise or batch effect. First, three libraries (one from each time point) were re-sequenced together in one sequencing lane and the results compared to the original sequencing of the same library (i-iii). Second, cDNA from previously sequenced samples were subjected to a new round of library preparation and re-sequenced together with initially prepared libraries (iv). Third, freshly prepared and sequenced libraries were compared to sequencing from the initial corresponding libraries (v). (E), Spike-in concentration vs FPKM values show strong linear correlation ( $r=0.96$ ). Spike-in values in 2 weeks vs 6 weeks samples, 2 weeks vs 12 weeks, and 6 weeks vs 12 weeks

show high technical consistency. **(F)**, Scatterplot comparing averaged gene expression in W02 to W06 cells, showing a high correlation  $r$  value (0.91), the expected lack of differential expression for stable cardiac genes (green dots: *TNNT2*, *ACTC1*, *TPM1*), but indistinct differential expression of variable cardiac genes (red dots: *MYH6*, *NKX2-5*, *DMD*) at this averaged pooled level of analysis. **(G)**, Scatterplot comparing gene expression in a single W06 cell to another single W06 cell, now showing a lower correlation  $r$  value (0.6) than **(E)**, the same lack of differential expression of stable cardiac genes (green dots), but instead distinct differential expression of the 3 variable cardiac genes (red dots).

### Supplementary Figure 3

**(A)**, Heatmap of cardiac genes that have either (a) constantly high expression in all cells at all-time points, (b) decreasing, or (c) increasing abundance in expression over time, or (d) highly variable expression across all time points. **(B)**, Line plots showing mean gene expression across cells for first and second heart field markers. Data are represented as mean FPKM  $\pm$  s.e.m. **(C)**, Immunostaining confirms protein expression at all-time points for cardiac alpha actinin ( $\alpha$ -act, top panel) and displaying sarcomere organization ( $\alpha$ -act, bottom panel). **(D)**, Immunostaining showing MLC2v protein expression appearing only from W06.

### Supplementary Figure 4

**(A)**, Module dendrogram showing gene-network modules that were derived using weighted gene co-expression network analysis (WGCNA). Each vertical black line represents a uniquely expressed gene, grouped according to co-expression gene modules (colored bars). Correlation between gene modules and the time points are represented in the 3 horizontal bars (blue for negative-correlation and red for positive-correlation). Six gene modules differed significantly between at least 2 of the time points. **(B)**, Top 50 expressed genes in each of the 6 modules. KME refers to module membership of each gene where values closest to 1 indicate genes that are most highly co-regulated with the other genes in the same module. **(C)**, Expression of 4 annotated lncRNAs associated with blue (midstage) module are represented. Line plots showing increased mean lncRNA expression across single cells in W02, W06 and W12 hESC-CM. Values



are represented as mean gene FPKM  $\pm$  s.e.m. Right panel shows violin plot with expression profile across different tissues from GTEx data set. Data are represented as log Transcripts Per Kilobase Million (TMP).

### Supplementary Figure 5

(A), Schematic representation showing genomic sequence alignment for *VHRT* extracted from Ensembl Genome Browser<sup>30</sup>. *VHRT* is primarily conserved among the primates.

(B), Schematic representing the workflow for cellular fractionation. Fractionation efficiency was visualized using trypan blue staining. RNA was extracted from each fraction and treated with DNase and profiled using Bioanalyzer assay.

(C), Histogram showing qPCR results for human atrial and ventricular heart tissue for *VHRT*, *MYH7*, *MYL2* and *NPPA*. n=3. \*\*  $p \leq 0.01$ .

### Supplementary Figure 6

(A), Table reflecting the coding potential for each *VHRT* isoform and positive controls using known protein coding genes *MYL2* and *MYH7*. Values were generated using the publicly available coding potential calculator (CPC). HIT ID shows the Uniprot ID related to the gene. A higher HIT score indicates higher likely for protein coding. For a true protein-coding isoform, most hits likely reside within one frame, whereas for a true noncoding isoform, even if it matches certain known protein sequence segments by chance, these random hits are likely to scatter between any of the three reading frames. Thus, FRAME score measures the distribution of the HSPs among three reading frames, the higher the FRAME score, the more concentrated the hits are and the more likely the transcript is protein-coding.

(B), Schematic showing the small open reading frame (sORF) region on *VHRT6* (*VHRT* isoform 6) and the sequence of the putative peptide with a predicted length of 76 amino acids (aa) and suggested mass of ca. 8 kDa. (C), Cartoon showing plasmid and inserts used for *in-vitro* translation. *VHRT6* (without introns) insert was generated with FLAG-tag at the N-terminus or C-terminus of the sORF (in red). Positive control plasmid contained TagBFP (Blue Fluorescent Protein) with FLAG (in blue). All inserts were cloned into

lentivirus plasmid (pLenti-EF1 $\alpha$ ) and used for cell transfection. **(D)**, Western blotting using anti-FLAG antibody detecting only a band of ~ 28kDa for TagBFP positive control plasmid. No bands were detected for *VHRT6*. BFP: blue florescent protein, BSD: blasticidin selection cassette, F: 1xFLAG-tag.

### Supplementary Figure 7

**(A)**, Sequence alignment for the deletion of 1110 bp with sgRNA\_2/4 set, and 1210 bp with sgRNA\_6/10 set. Primers sets used for genotyping are schematically represented. **(B)**, Genotyping results proving successful deletion of the *VHRT* locus using sgRNA\_2/4 set. Validation primer set p1+p4 and p2+p3, were used and clone #1 resulted in complete *VHRT* KO. **(C)**, Genotyping results proving successful deletion of *VHRT* locus using sgRNA\_6/10 set. Validation primer set p5+p8 and p6+p7 were used and clone #16 resulted in complete *VHRT* KO.

### Supplementary Figure 8

**(A)**, Graphs showing the absence of changes in expression of key differentiation markers (*OCT4*, *NANOG*, *ISL1* and *NKX2-5*) in *VHRT* KO cells. **(B)**, Tri-lineage differentiation following *VHRT* deletion. Graphs showing absence of significant changes in expression of specific lineage markers, confirming that *VHRT* KO cells were able to successfully specify into ectodermal (*NES* and *PAX6*), mesodermal (*TBXT* and *CXCR4*) and endodermal (*SOX17* and *FOXA2*) lineages despite *VHRT* deletion. Data are represented as fold change expression  $\pm$  s.e.m, n=3 biological replicates. Student's paired t-test with a two-tailed distribution.

### Supplementary Figure 9

**(A)**, Representative images of GFP expression signal at d7-8 post hES differentiation in WT, and *VHRT* KO #1 and #2. **(B)**, Immunostaining shows sarcomere disorganization for *VHRT* KO #1 and #2, compared

to WT, following W02 and W06 of the CM differentiation protocol.  $\alpha$ -act: alpha-actinin 2, and MLC2v: Myosin regulatory light chain 2.

### Supplementary Figure 10

(A), Histogram showing the differentiation efficiency as *MYH6*-GFP %positive cells between WT and *VHRT* KO at W02. Error bars represented  $\pm$  s.d. (n=4 for WT, n=4 *VHRT* KO #1, n=3 *VHRT* KO #2). (B) Assay for *MYH6*-GFP positive (+) cells in WT and *VHRT* KO #1 by flow cytometry at W02, W06 and W12.

### Supplementary Figure 11

(A), Histogram showing qPCR results for *VHRT* and *ATP2A2* siRNA KD (n=2). (B), Table showing action potentials recordings. 14 cells transfected with *VHRT* GapmeR#1(*VHRT* knockdown) and 15 cells transfected with Negative A GapmeR (Negative Ctrl) were recorded. hESC-CMs were co-transfected with BLOCK-iT™ Alexa Fluor® Red Fluorescent to identified positively transfected hESC-CMs. Recordings were made from spontaneously beating cells and with electrical stimulation at 1 Hz. After *VHRT* GapmeR#1 knockdown, hESC-CMs showed a less negative maximal diastolic potential (MDP) and a significantly higher APD90/APD50 ratio and APD90-APD20 than Negative Ctrl, indicating an action potential that was less ventricular in nature, compared to negative control cells. Parameters of APs include: AP amplitude (APA), maximal diastolic potential (MDP), overshoot, upstroke velocity of depolarization ( $V_{max}$ ), AP durations (APD) at 20%, 50% and 90% of repolarization (APD20, APD50, and APD90). \*  $p < 0.05$  compared to Negative A control cells. Student's t test. (C), Representative action potential profile from W06 hESC-CMs after *VHRT* GapmeR#1 KD (lower panel) compared to CTR (non-targeting GapmeR) cells (lower panel).

### Supplementary Figure 12

(A), LocusZoom of the 1-MB genomic region harboring *VHRT* depicting significant *VHRT* cis-eQTL SNPs in heart left ventricle (HLV) (upper panel), as well SNPs significantly and/or suggestively associated with CAD, MI, HF (non-ischemic) and/or AF (lower panel). The latter data is taken from published GWAS<sup>8,9,11,19,20</sup>. (B), Top panel showing an example of eQTL rs3184504-C associated with decreased MI and CAD risk, but not with *VHRT* expression. Mid panel displaying the eQTL rs6489844-G, associated with decreased expression of *VHRT* in HLV tissue and suggestively associated with increased risk for HF, but decreased risk of MI. Similarly, on the bottom panel the eQTL rs11065780-C is significantly associated with low *VHRT* expression in HLV and increased HF, but suggestively associated with decreased CAD risk (bottom panel). NES: normalized effect size.  $P < 0.05$ . (C), *VHRT* (probeset 230195\_at) is significantly downregulated in left ventricular (LV) tissue in patients with Idiopathic Dilated Cardiomyopathy (N=15) versus healthy controls (N=11), but not in Hypertrophic- (N=5), Idiopathic (N=12) or Ischemic (N=31) cardiomyopathy based on reanalysis of microarray data from GEO study GSE1145 (<https://www.ncbi.nlm.nih.gov/geo/query/acc.cgi?acc=GSE1145>).

### Supplementary Figure 13

A), Heatmap of normalized expression values of 1100 significantly differentially expressed (DE) genes in *VHRT* KD, compared to the RNAseq from Non-Failing (NF) versus failing (Dilated Cardiomyopathy, DCM) hearts. The subset that were consistent for downregulation in the 2 comparisons are represented in Figure 6.

## **SUPPLEMENTARY TABLES**

**Supplementary Table 1:** Single cell RNAseq and data quality.

**Supplementary Table 2:** Tabulation of gene expression in each week.

**Supplementary Table 3:** WGCNA module and gene kME values.

**Supplementary Table 4:** Gene ontology of 6 modules.

**Supplementary Table 5:** VHRT transcripts description and annotation.

**Supplementary Table 6:** Gene ontology for genes differentially regulated in VHRT WT vs VHRT KO #1 in 02W,06W,12W old hES-CM.

**Supplementary Table 7:** Gene ontology for genes differentially regulated in VHRT CTRL vs VHRT GapmeR KD.

**Supplementary Table 8:** GeneNetwork data analysis.

**Supplementary Table 9:** Human Dilated cardiomyopathy (DCM) and non-failing (NF) tissue biodata.

**Supplementary Table 10:** Combined transcriptome analysis of VHRT GapmeR KD and human Dilated cardiomyopathy.

**Supplementary Table 11:** Oligonucleotides.

**Figure 1**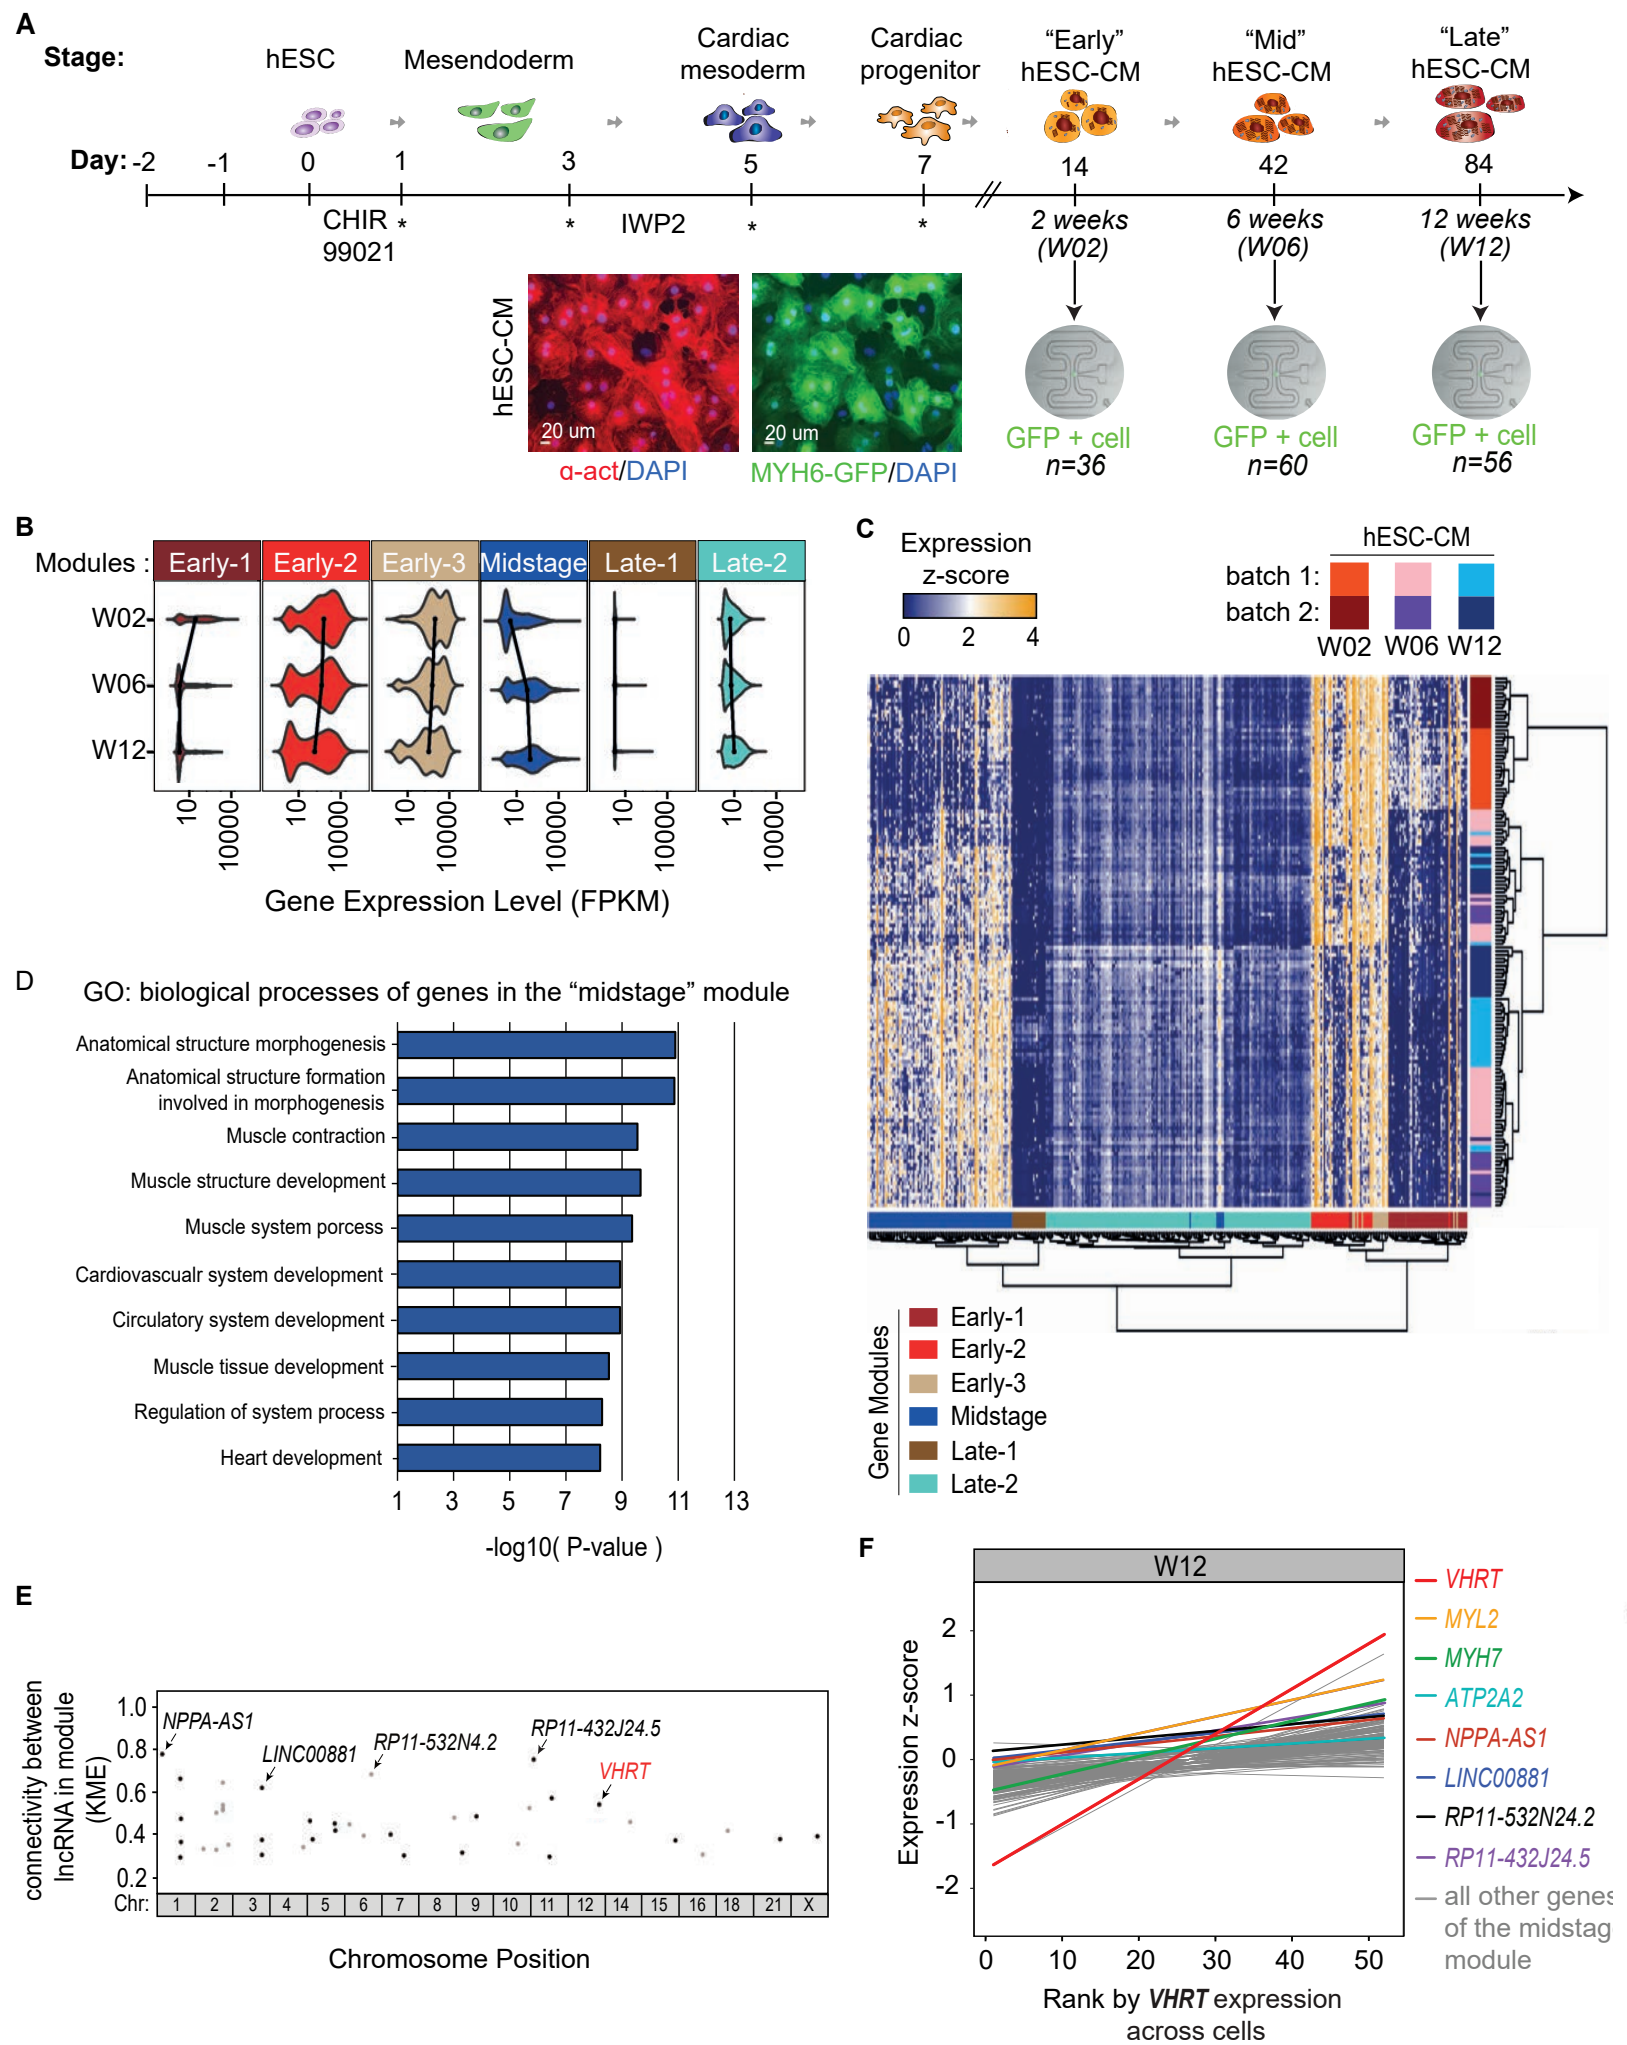

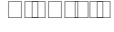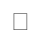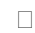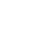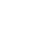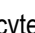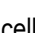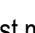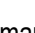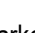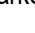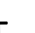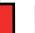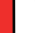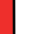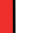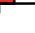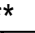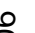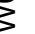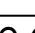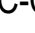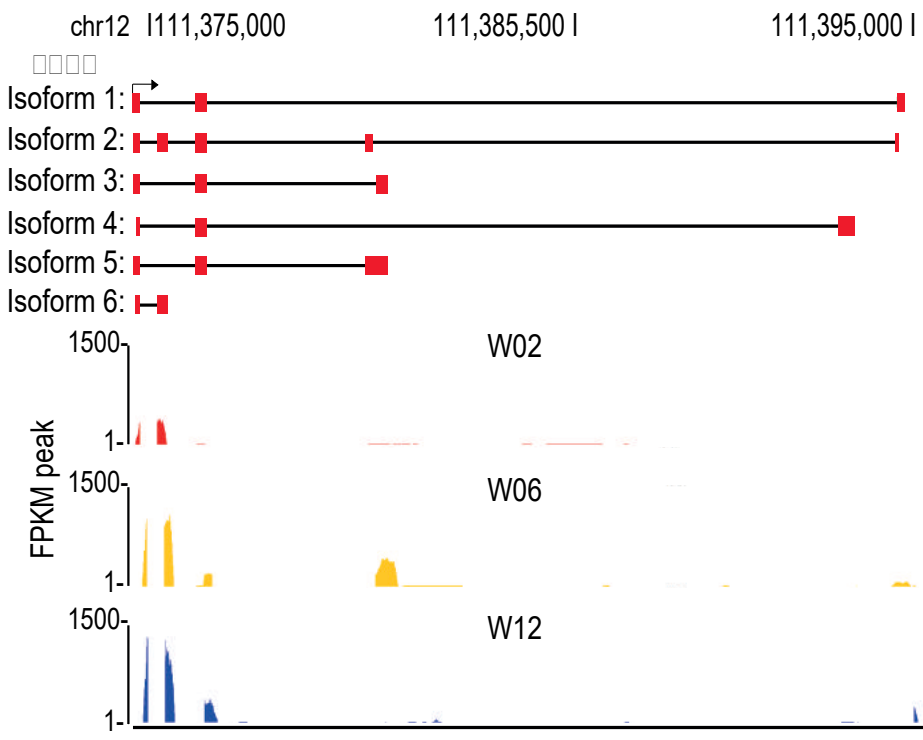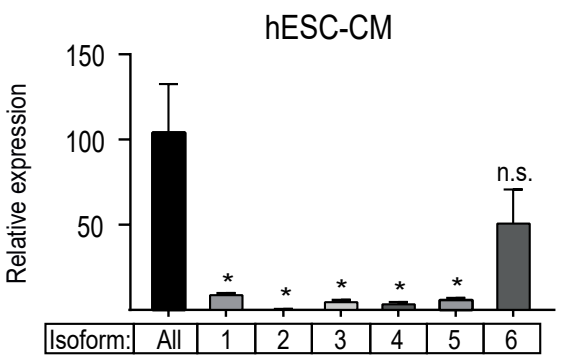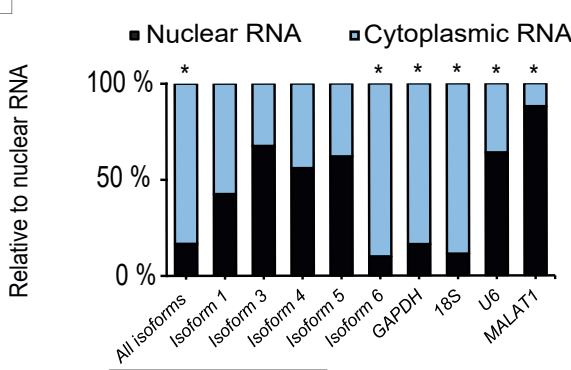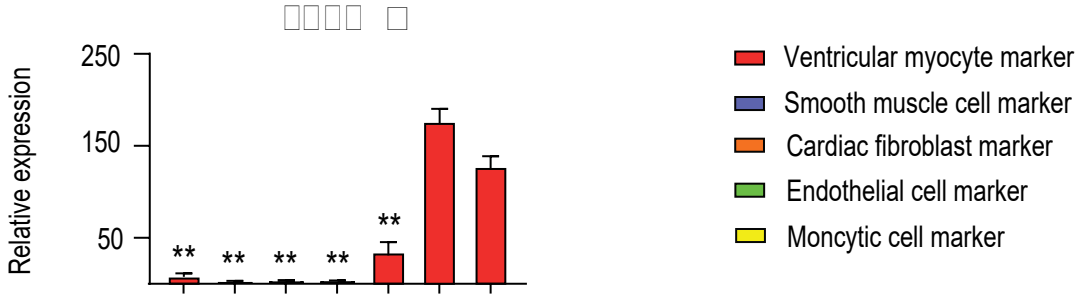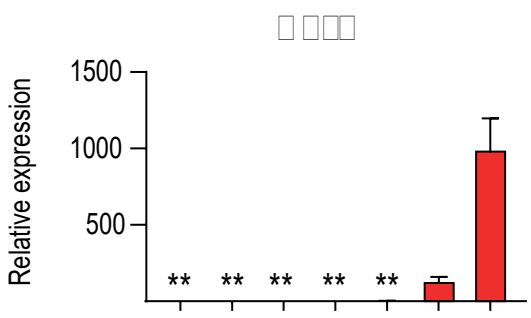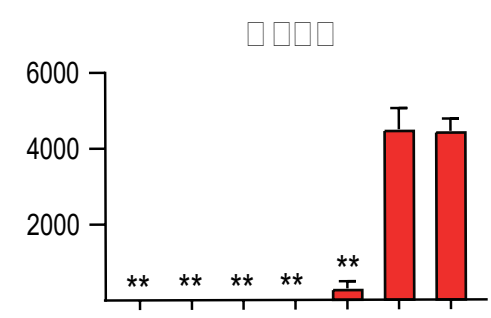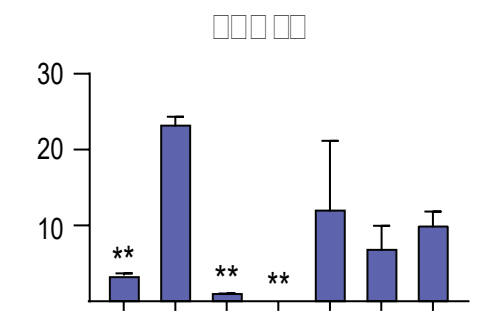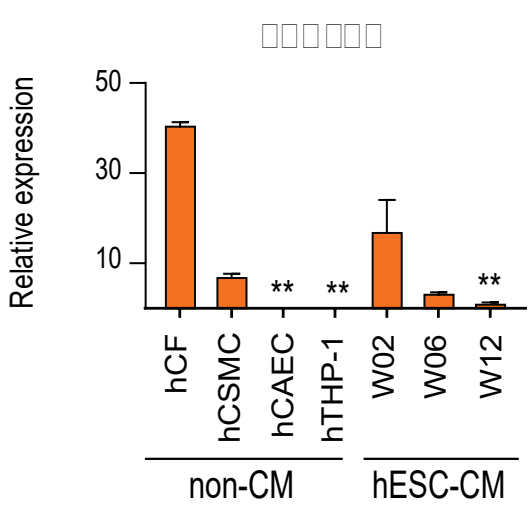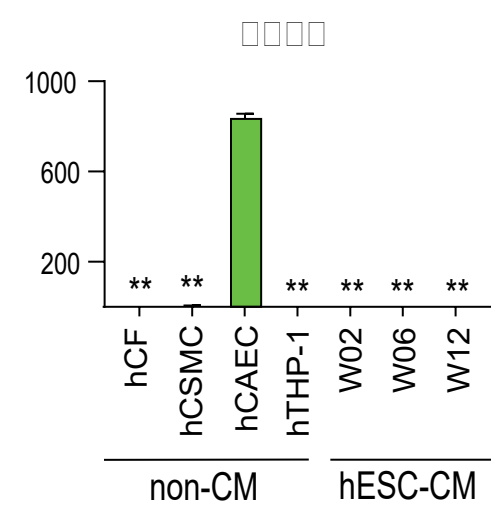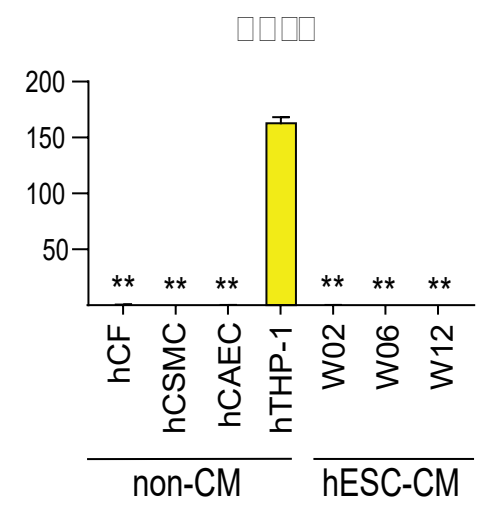

**Figure 3**

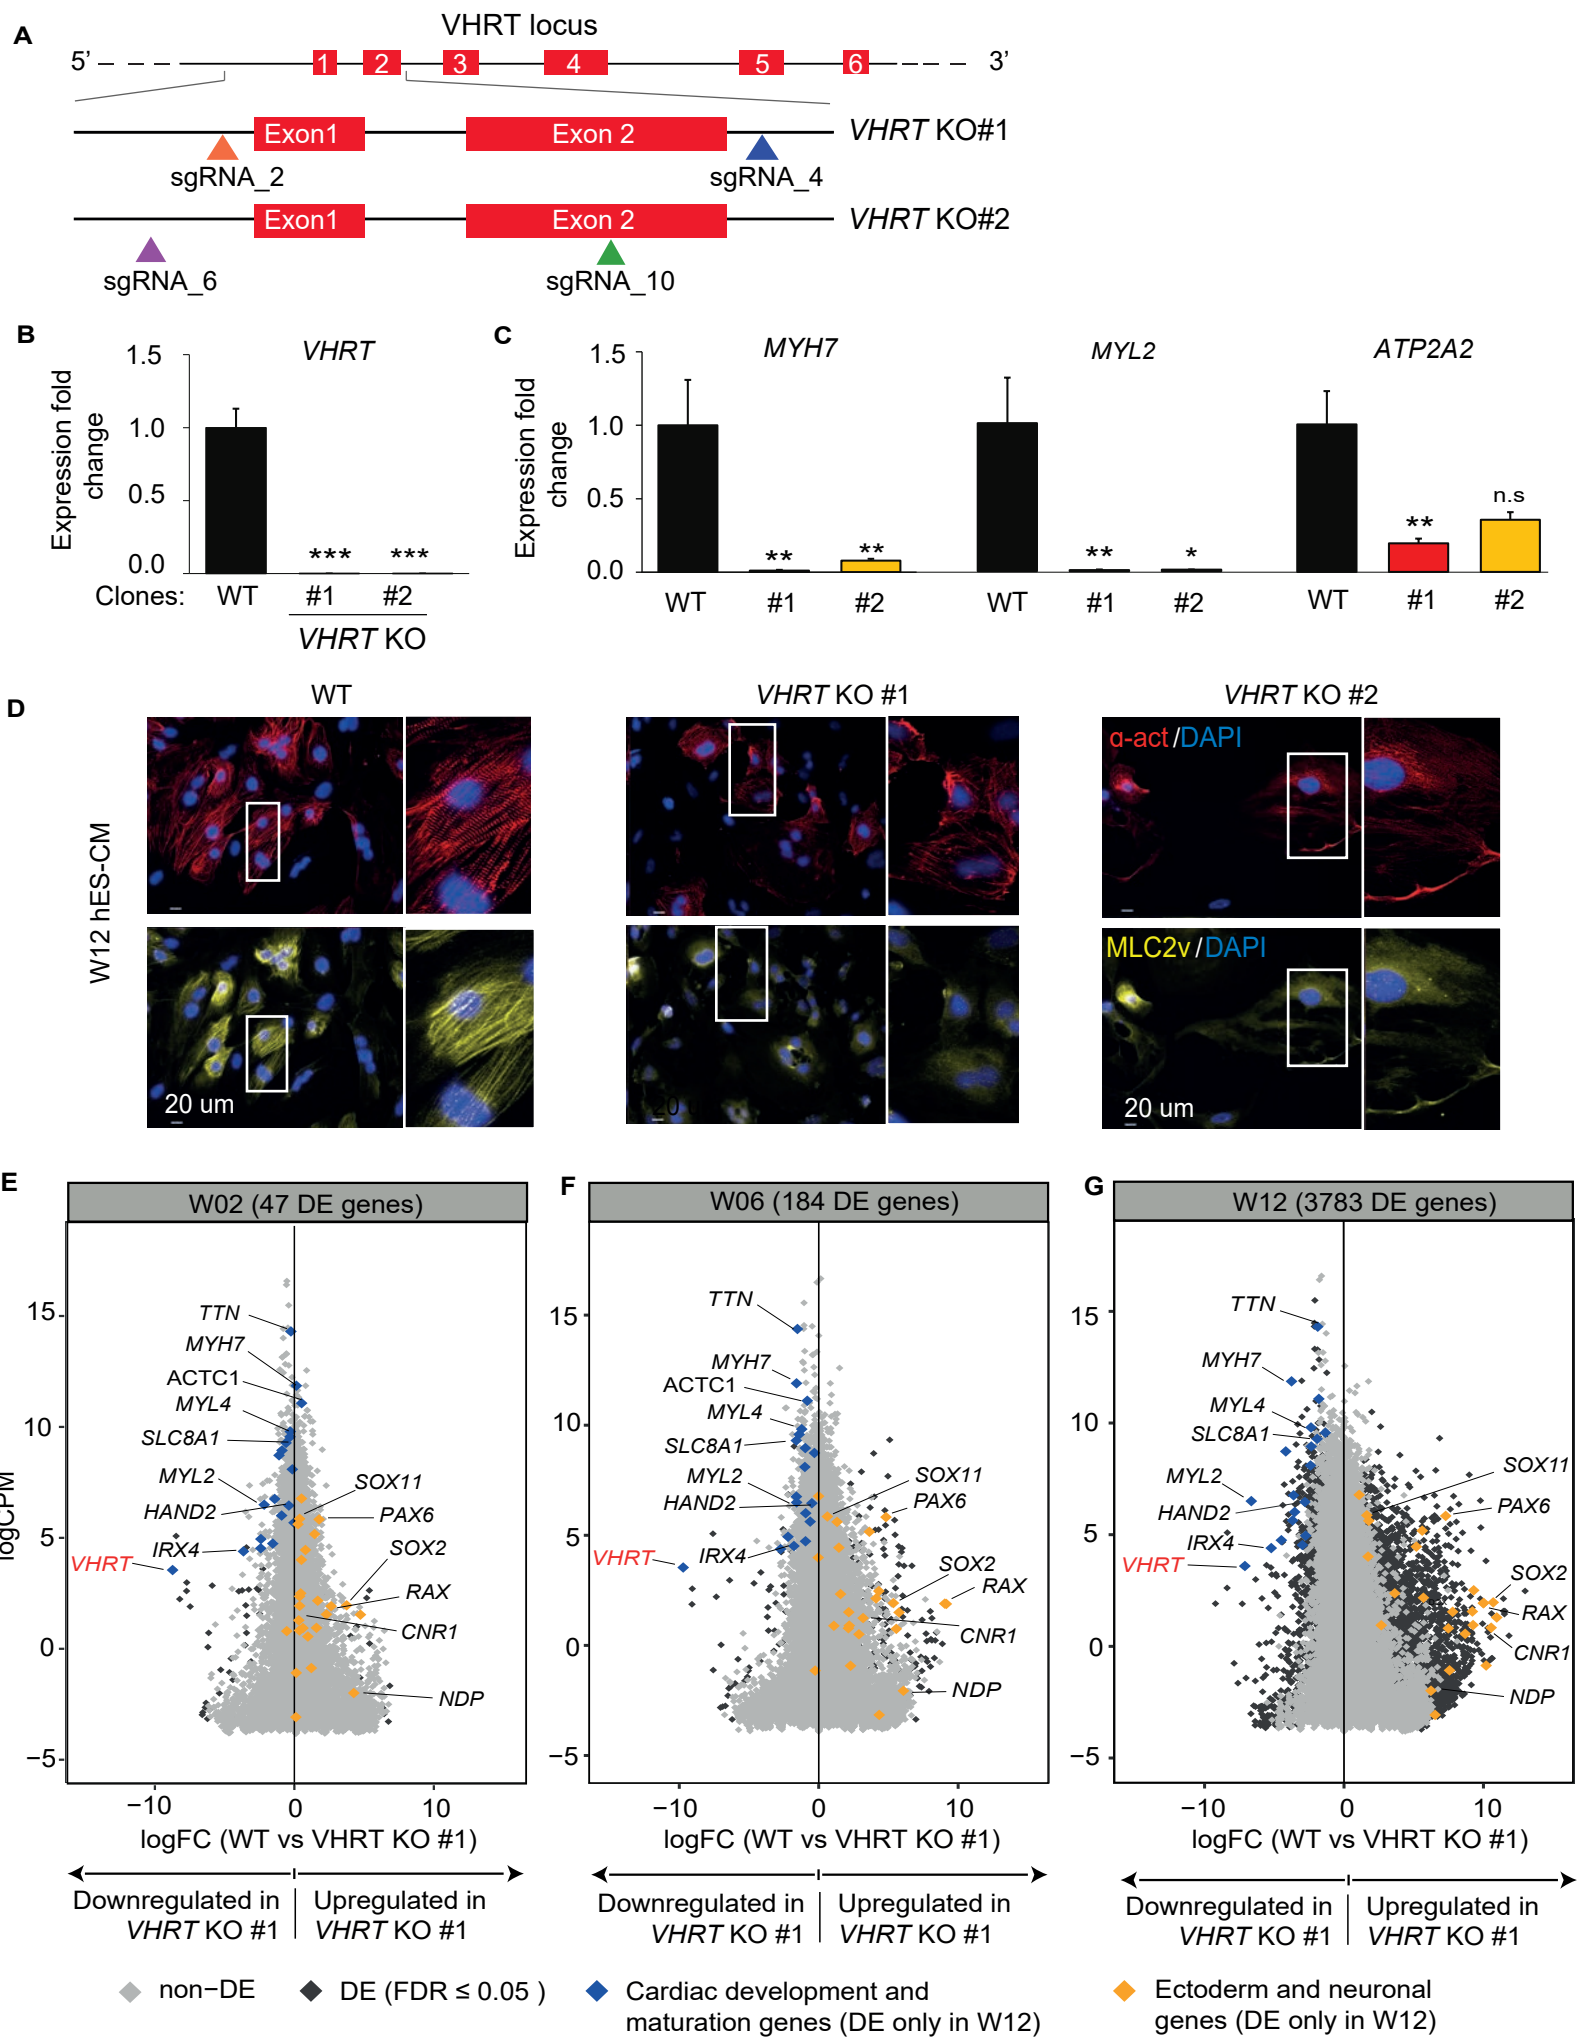



**Figure 4**

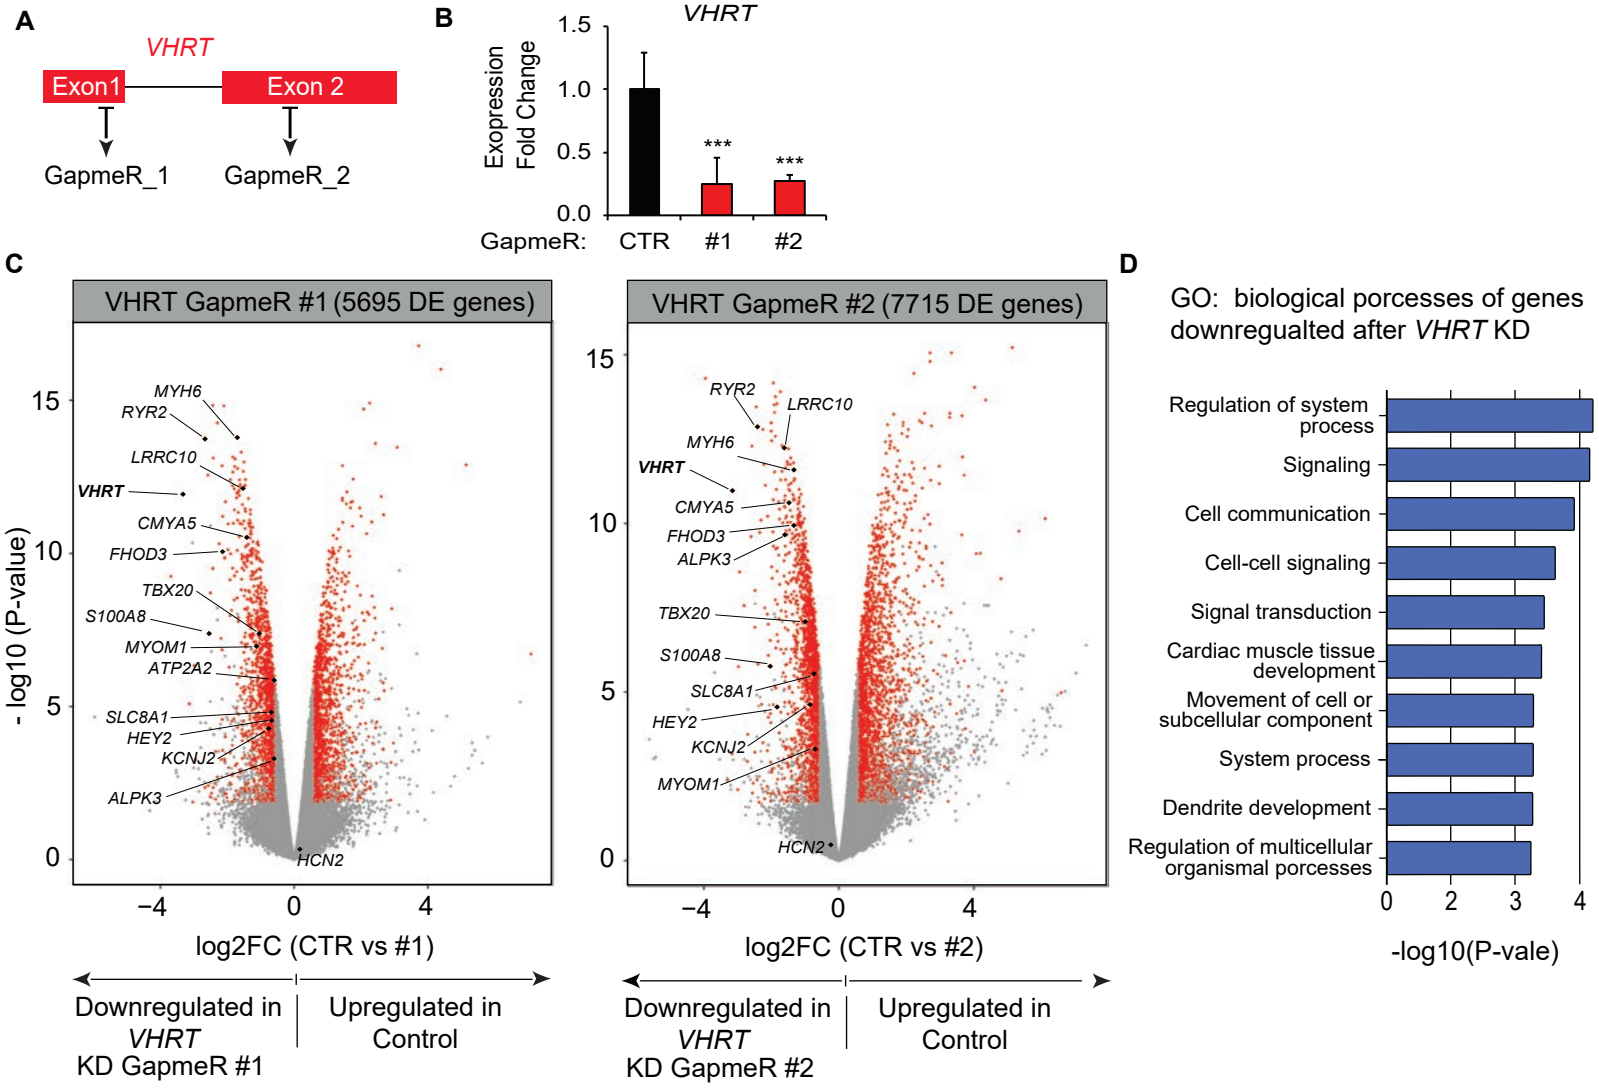

◆ DE (FDR  $\leq 0.05$ )    ◆ non-DE    ◆ Cardiac contraction, calcium signaling and cardiac development genes

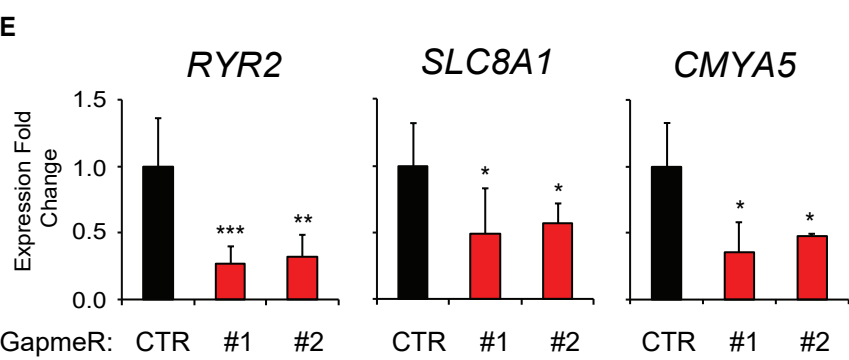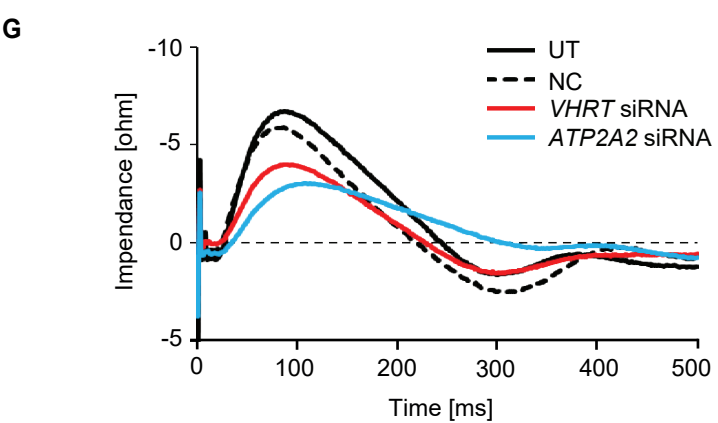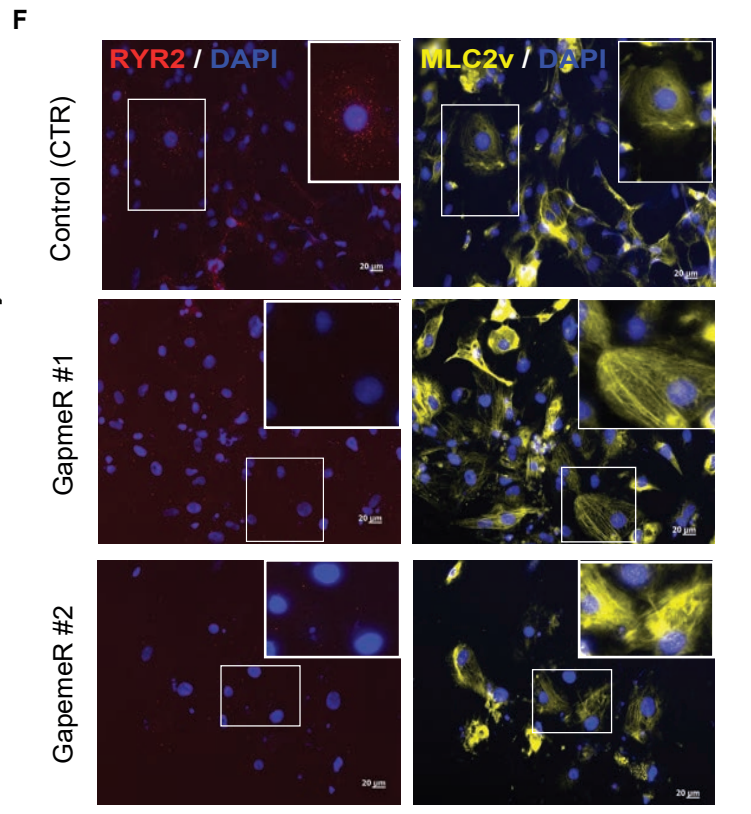

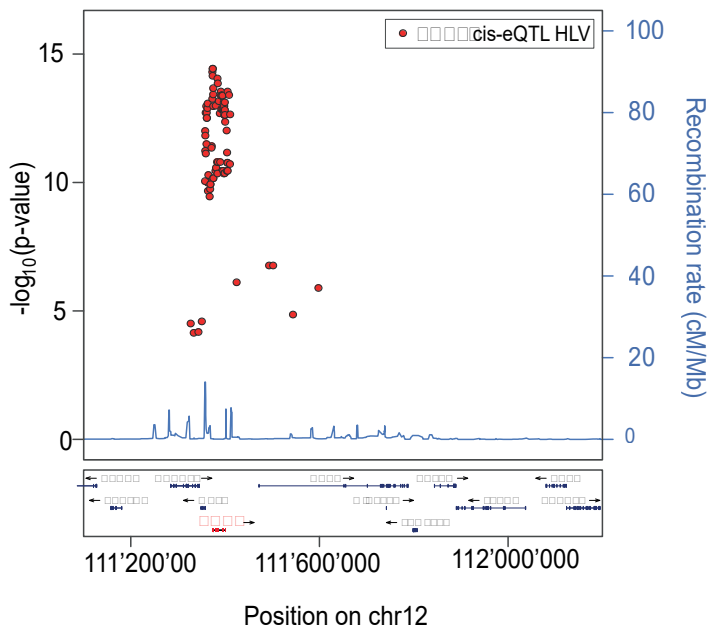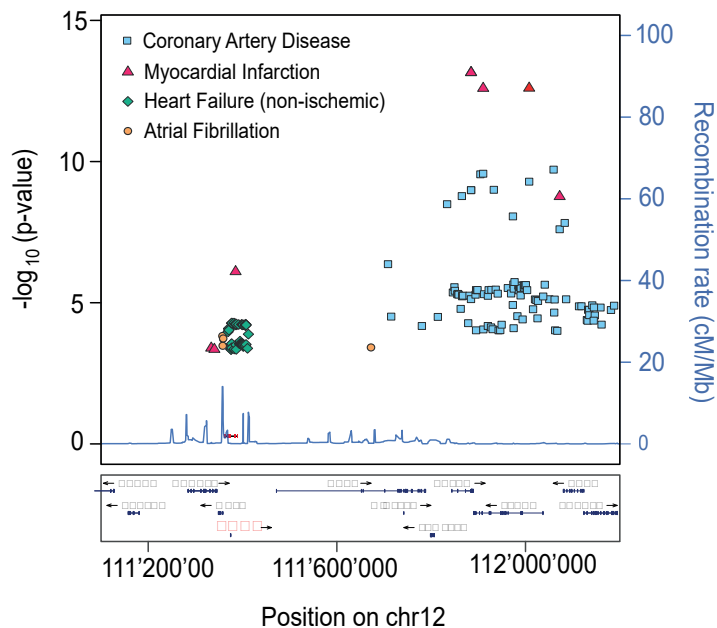

| Tissue            | Count     | Correlation |
|-------------------|-----------|-------------|
| Muscle            | 447       | 2.80        |
| <b>Heart</b>      | <b>91</b> | <b>2.23</b> |
| Thymus            | 9         | 0.82        |
| Testis            | 14        | 0.73        |
| Skin              | 866       | 0.62        |
| Intestine         | 134       | 0.24        |
| Esophagus         | 60        | 0.02        |
| Brain             | 1281      | 0           |
| Breast            | 32        | -0.03       |
| Epithelial tissue | 201       | -0.15       |
| Lung              | 349       | -0.24       |
| Spleen            | 21        | -0.24       |
| Prostate          | 135       | -0.29       |
| Ovary             | 24        | -0.30       |
| Kidney            | 99        | -0.31       |
| Stomach           | 19        | -0.31       |
| Bladder           | 68        | -0.34       |
| Thyroid           | 60        | -0.35       |
| Pancreas          | 355       | -0.36       |
| Adrenal gland     | 23        | -0.36       |
| Liver             | 141       | -0.37       |
| Bone marrow       | 114       | -0.38       |
| Placenta          | 111       | -0.39       |
| Blood             | 3003      | -0.40       |
| Adipose tissue    | 276       | -0.42       |
| Gall bladder      | 8         | -0.50       |

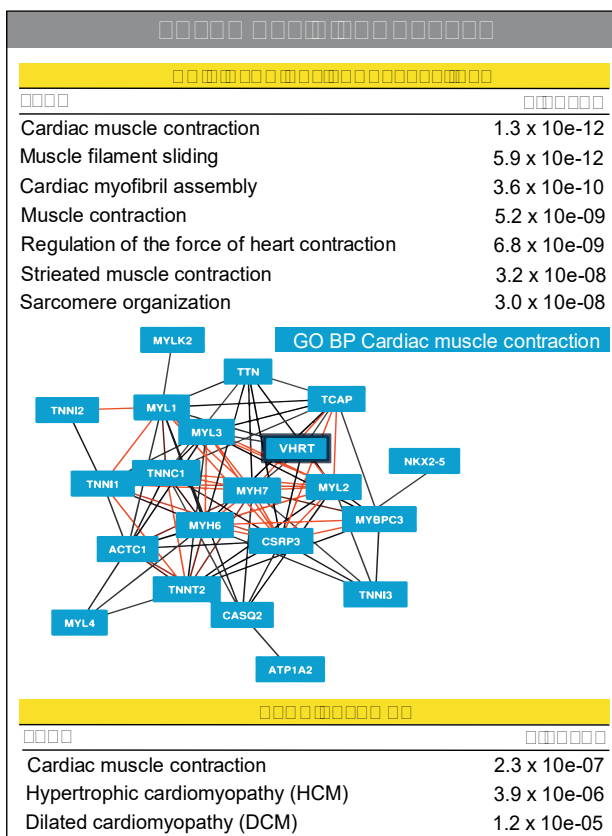

|                                             |                         |
|---------------------------------------------|-------------------------|
| Ventricular tachycardia                     | 2.3 x 10 <sup>-15</sup> |
| Muscle fiber cytoplasmatic inclusion        | 4.3 x 10 <sup>-13</sup> |
| Myopathy                                    | 6.8 x 10 <sup>-13</sup> |
| Supraventricular tachycardia                | 1.2 x 10 <sup>-11</sup> |
| Tachycardia                                 | 1.4 x 10 <sup>-11</sup> |
| Nemaline bodies                             | 4.7 x 10 <sup>-11</sup> |
| Muscle fiber inclusion bodies               | 5.1 x 10 <sup>-11</sup> |
| EMG abnormality                             | 9.2 x 10 <sup>-11</sup> |
| Supraventricular arrhythmia                 | 1.4 x 10 <sup>-10</sup> |
| Abnormality of muscle fibers                | 2.1 x 10 <sup>-10</sup> |
| Abnormality of circulating enzyme level     | 1.1 x 10 <sup>-09</sup> |
| Primary atrial arrhythmia                   | 1.1 x 10 <sup>-09</sup> |
| Abnormal levels of creatine kinase in blood | 1.5 x 10 <sup>-09</sup> |
| Elevated serum creatine phosphokinase       | 1.7 x 10 <sup>-09</sup> |
| Atrial fibrillation                         | 3.6 x 10 <sup>-09</sup> |
| Type 1 muscle fiber predominance            | 4.1 x 10 <sup>-09</sup> |
| Dilated cardiomyopathy                      | 5.2 x 10 <sup>-09</sup> |
| Lipoatrophy                                 | 2.5 x 10 <sup>-08</sup> |
| Neck muscle weakness                        | 4.5 x 10 <sup>-08</sup> |
| Asymmetric septal hypertrophy               | 7.5 x 10 <sup>-08</sup> |

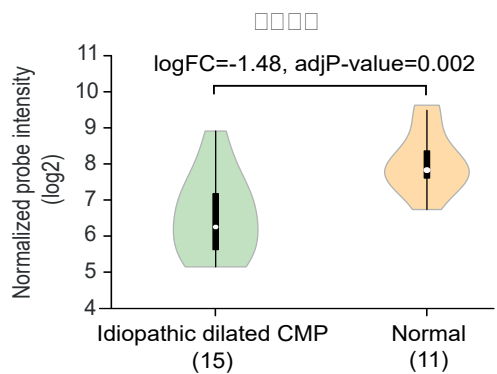

**Figure 6**

bioRxiv preprint doi: <https://doi.org/10.1101/2021.02.01.429136>; this version posted February 2, 2021. The copyright holder for this preprint (which was not certified by peer review) is the author/funder, who has granted bioRxiv a license to display the preprint in perpetuity. It is made available under aCC-BY-NC-ND 4.0 International license.

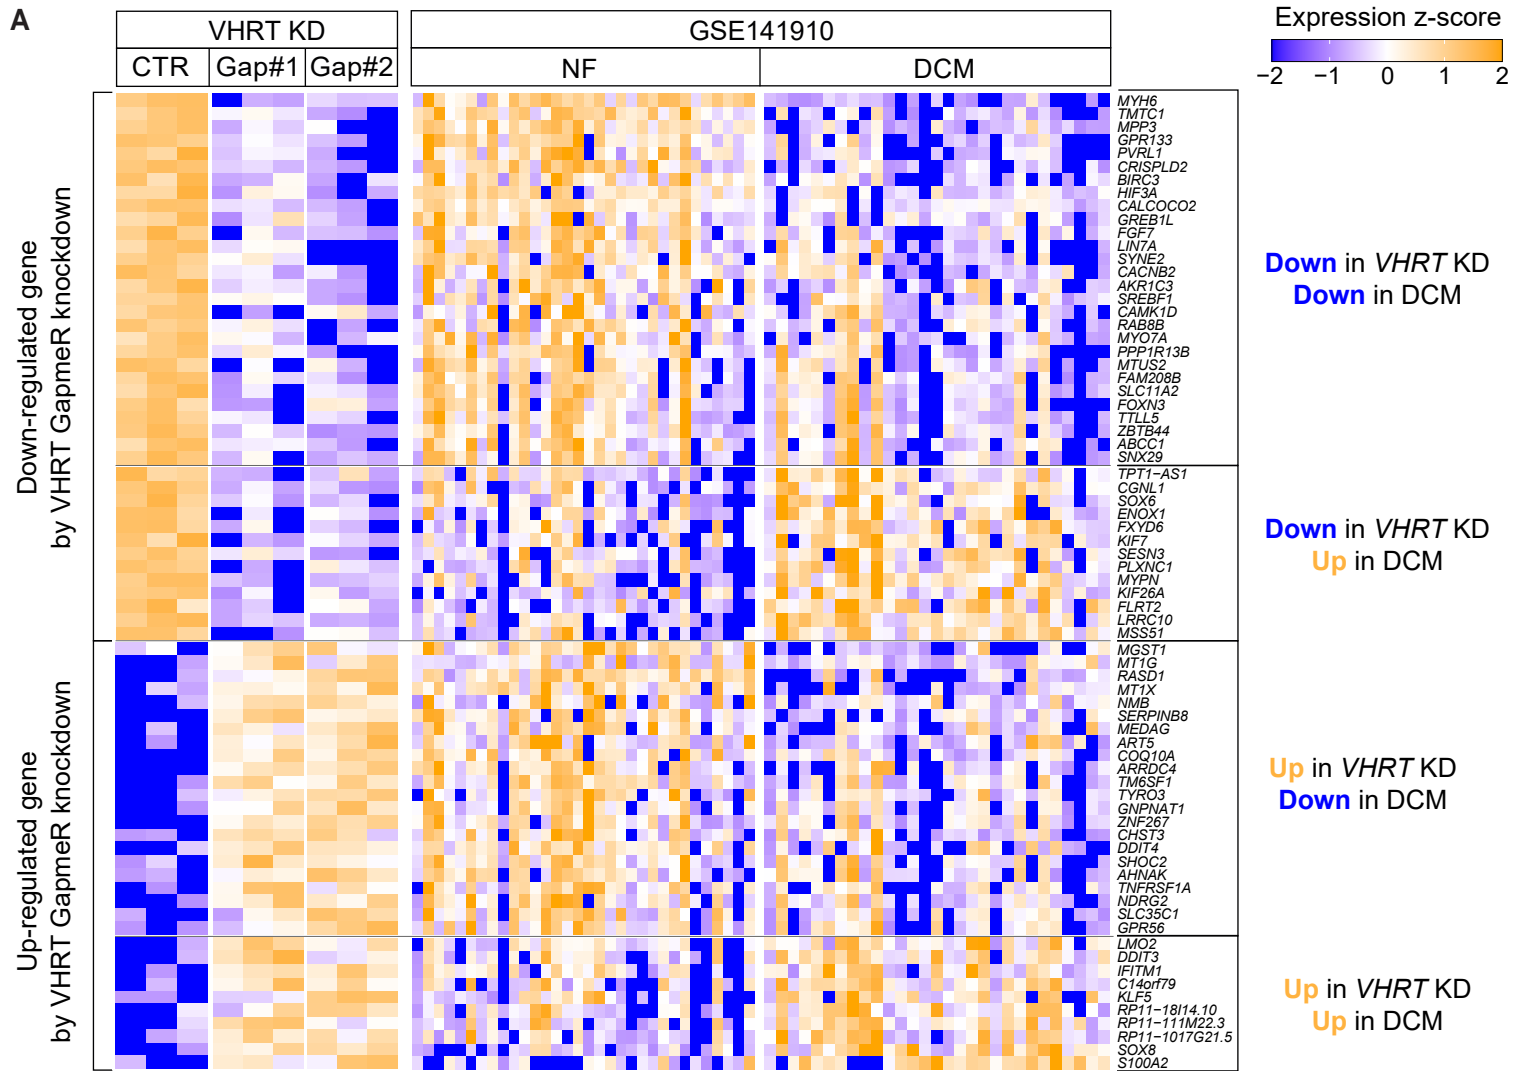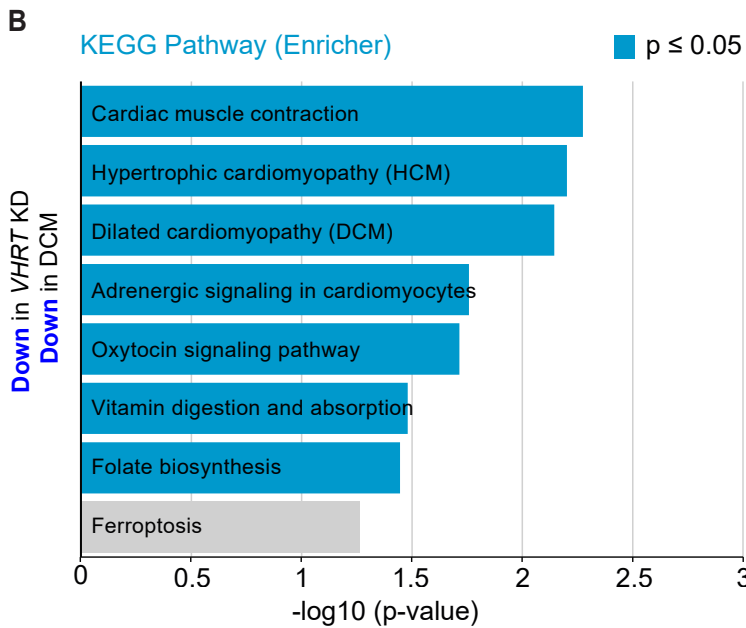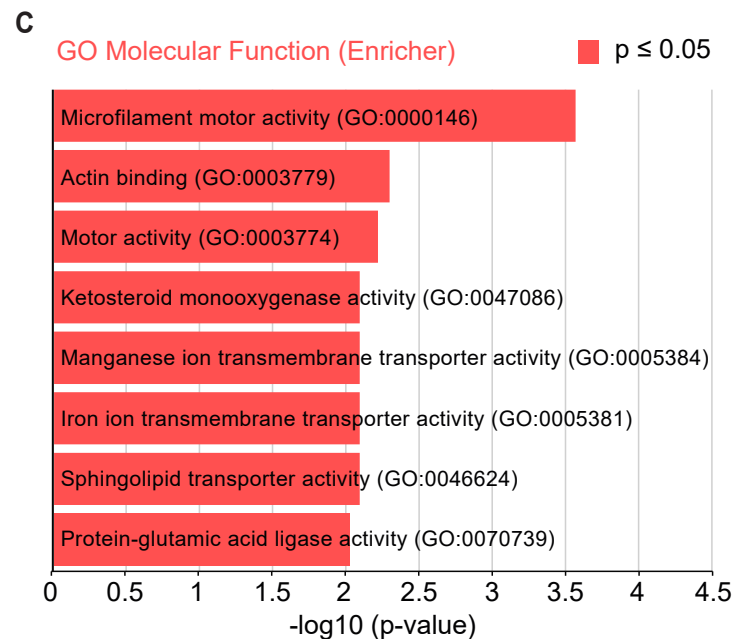

|                     | Base Impedance<br>[ohm] | Beat rate<br>[bpm] | Amplitude<br>[ohm] | Pulse width 50 %<br>[ms] | Upstroke velocity<br>[ohm/s] | Downstroke velocity<br>[ohm/s] |
|---------------------|-------------------------|--------------------|--------------------|--------------------------|------------------------------|--------------------------------|
| <b>UT</b>           | 577±18**                | 60±0               | 7.1±0.4**          | 162±10                   | 223±29***                    | -56±5                          |
| <b>NT</b>           | 523±39                  | 60±0               | 6.0±0.6            | 164±14                   | 176±22                       | -50±7                          |
| <b>VHRT siRNA</b>   | 403±8****               | 60±0               | 4.4±0.2****        | 176±8                    | 108±3****                    | -36±2***                       |
| <b>ATP2A2 siRNA</b> | 405±26****              | 60±0               | 3.3±0.5****        | 260±10****               | 63±9****                     | -17±2****                      |

**Table 1: CardioExocyte profile from CM after VHRT siRNA knockdown.**

Contractility profile was measured using Cardioexcyte 96 instrument (Nanon). Base impedance, beat rate, amplitude, pulse width, upstroke velocity and down velocity are shown. *ATP2A2* siRNA was used as positive control and non-targeted siRNA (NT) as well as un-treated (UT) as negative controls. The data was analyzed using the data control software from Nanion. One-way ANOVA, multiple comparisons, compared to control siRNA. Data are shown as mean ± s.e.m. \*  $p < 0.05$ , \*\* $p < 0.01$ , \*\*\* $p < 0.001$  and \*\*\*\* $p < 0.0001$ .

Supplementary Figure 1

A

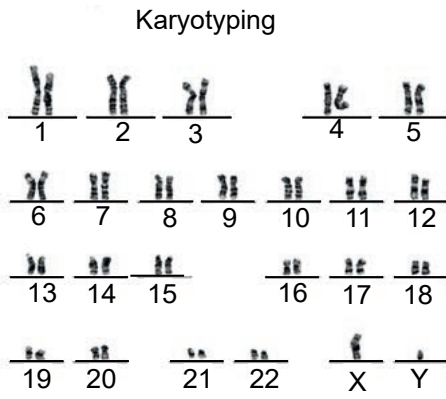

B

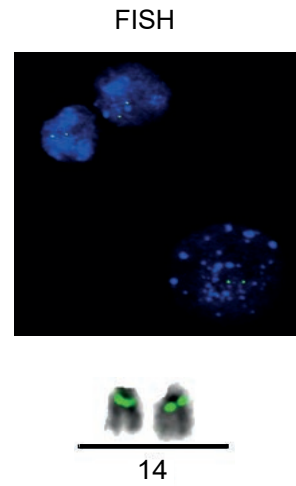

C

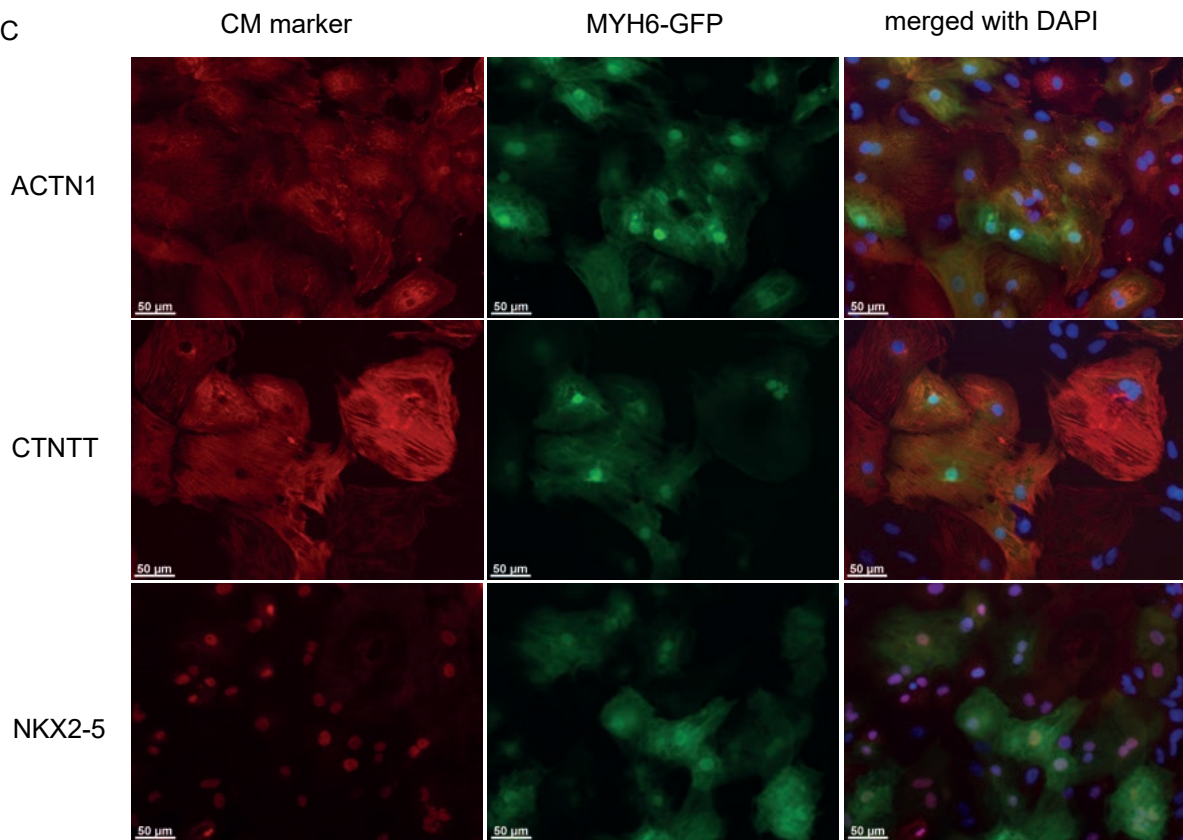

D

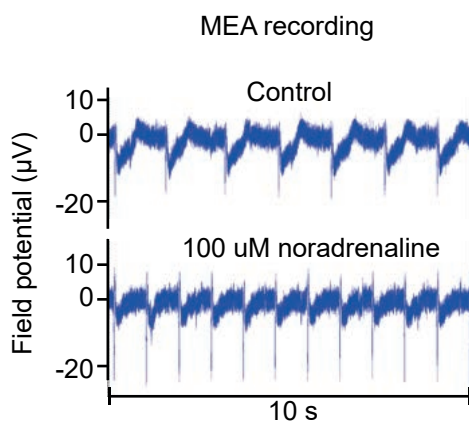

A

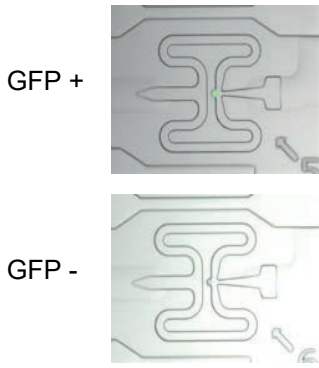

B

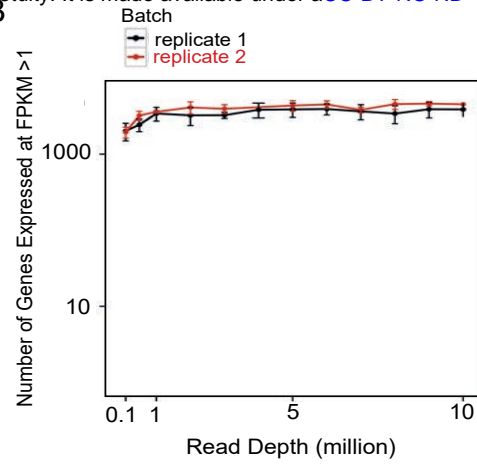

C

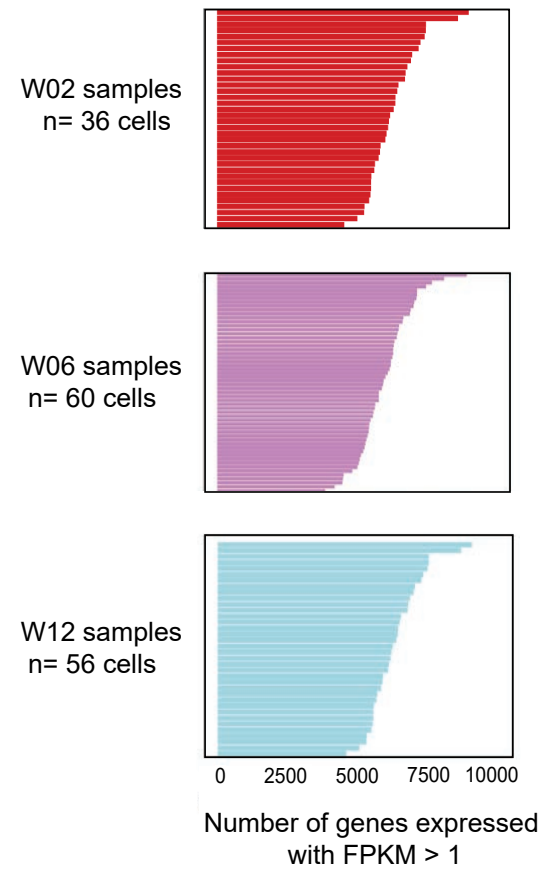

D

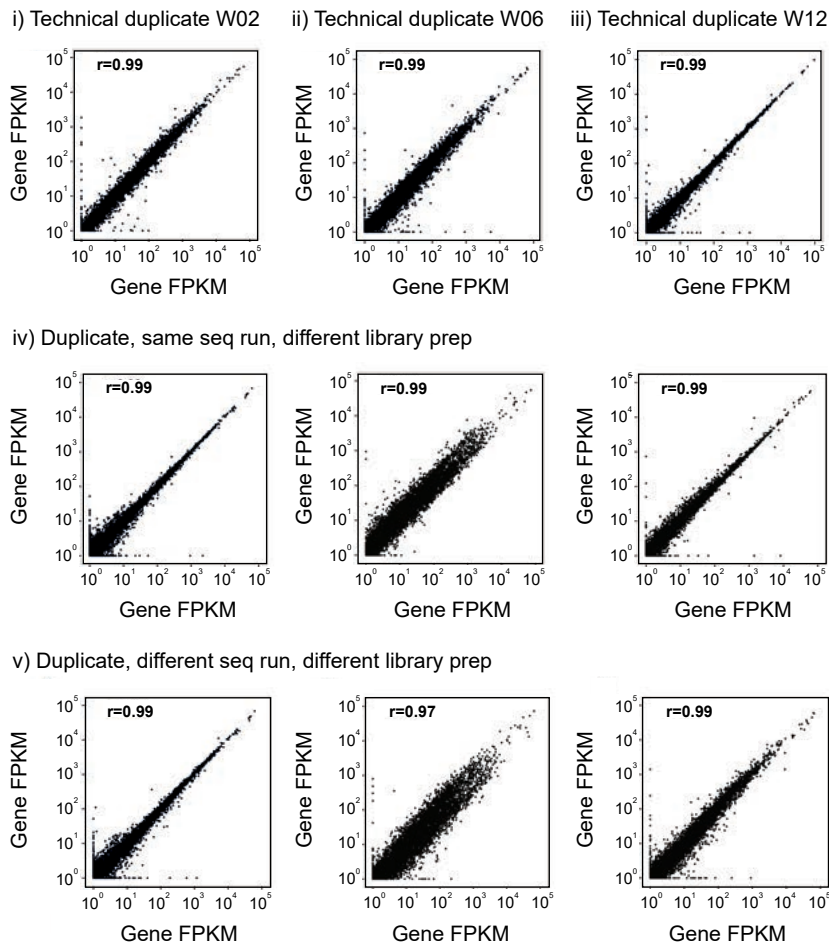

E

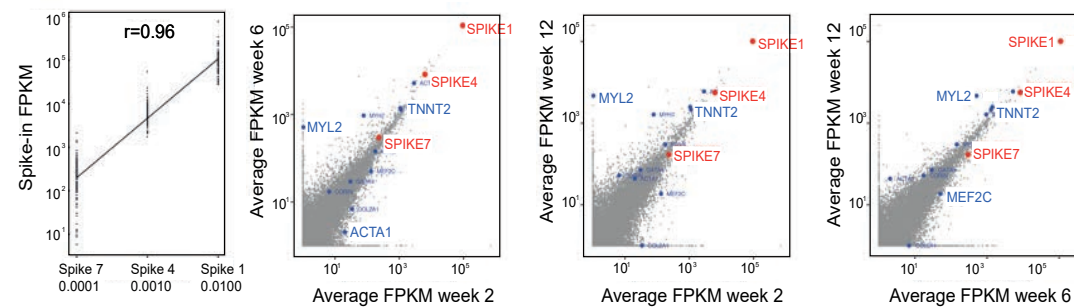

F

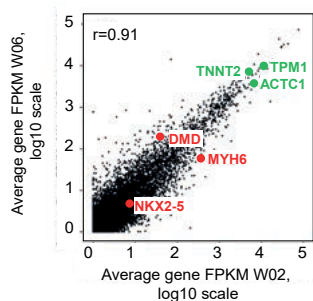

G

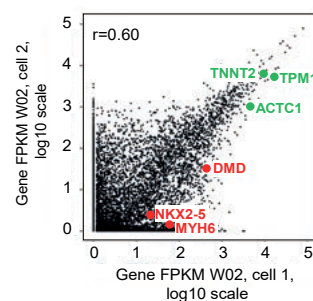

A

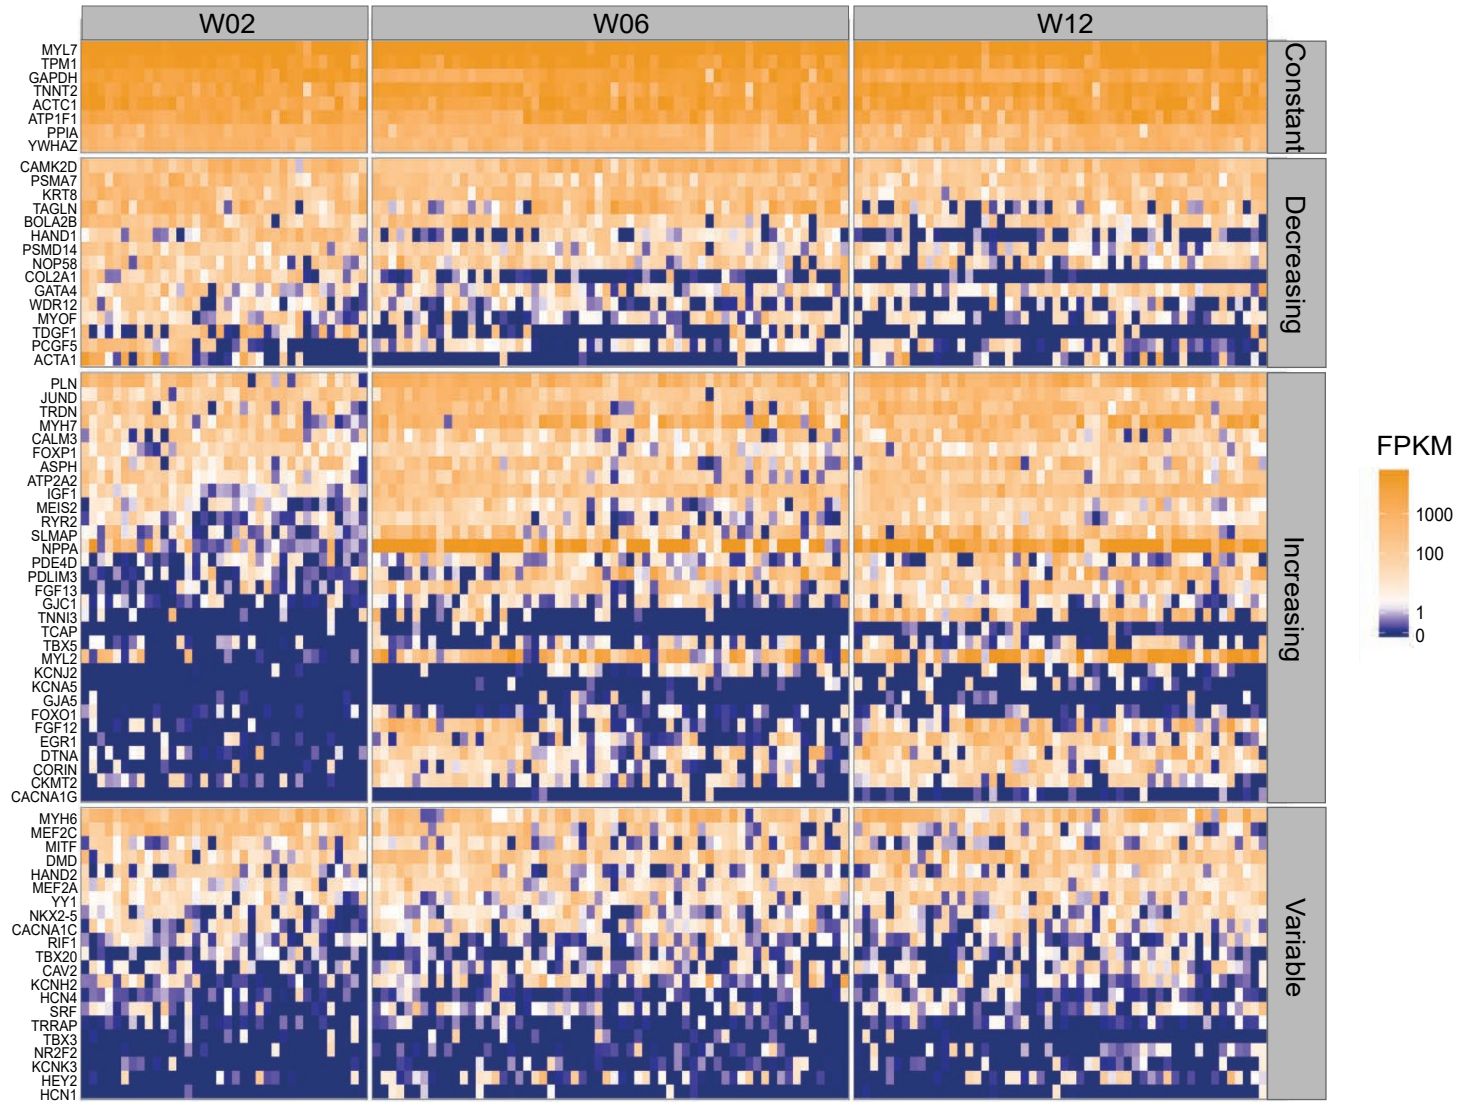

B

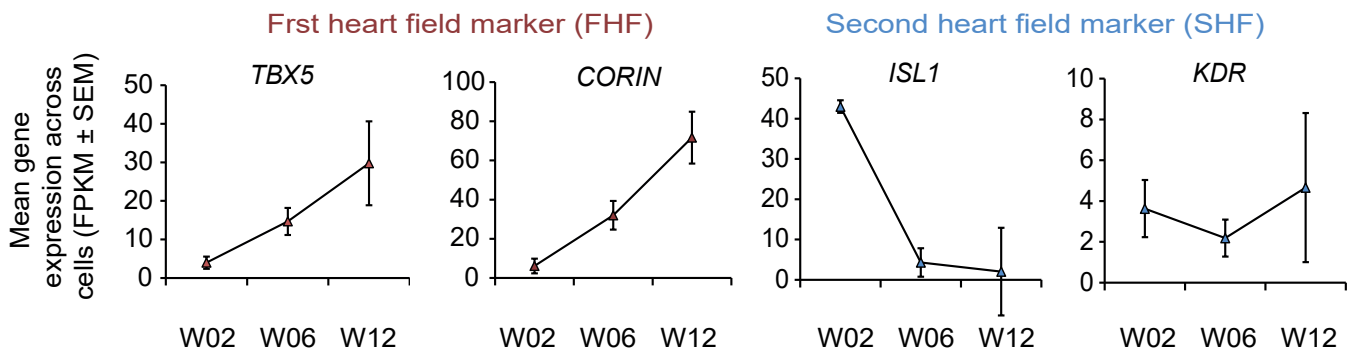

C

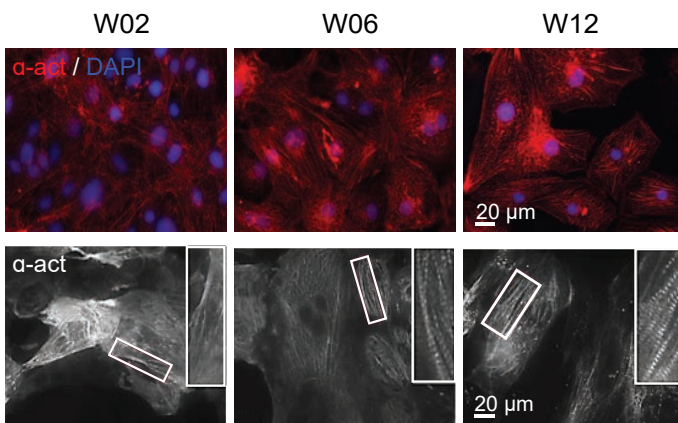

D

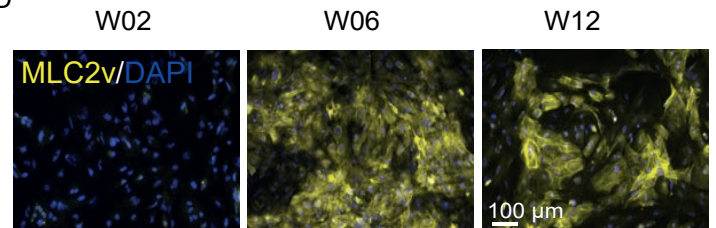

A

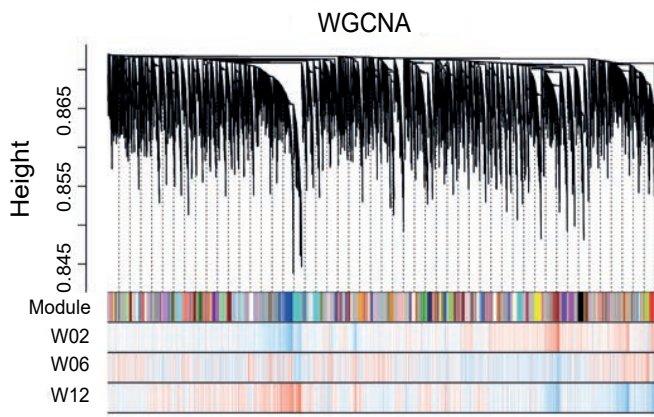

B

Gene Modules

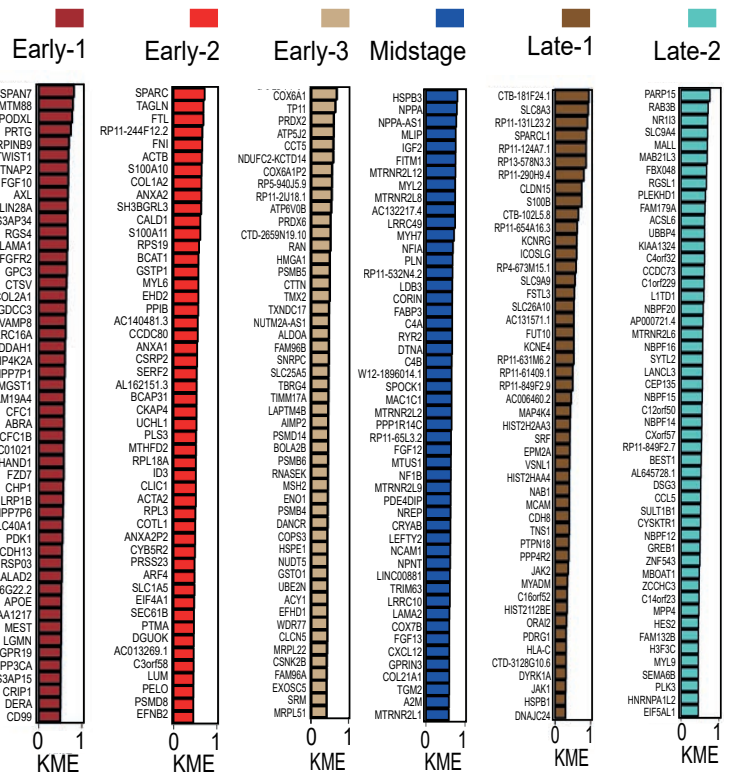

C

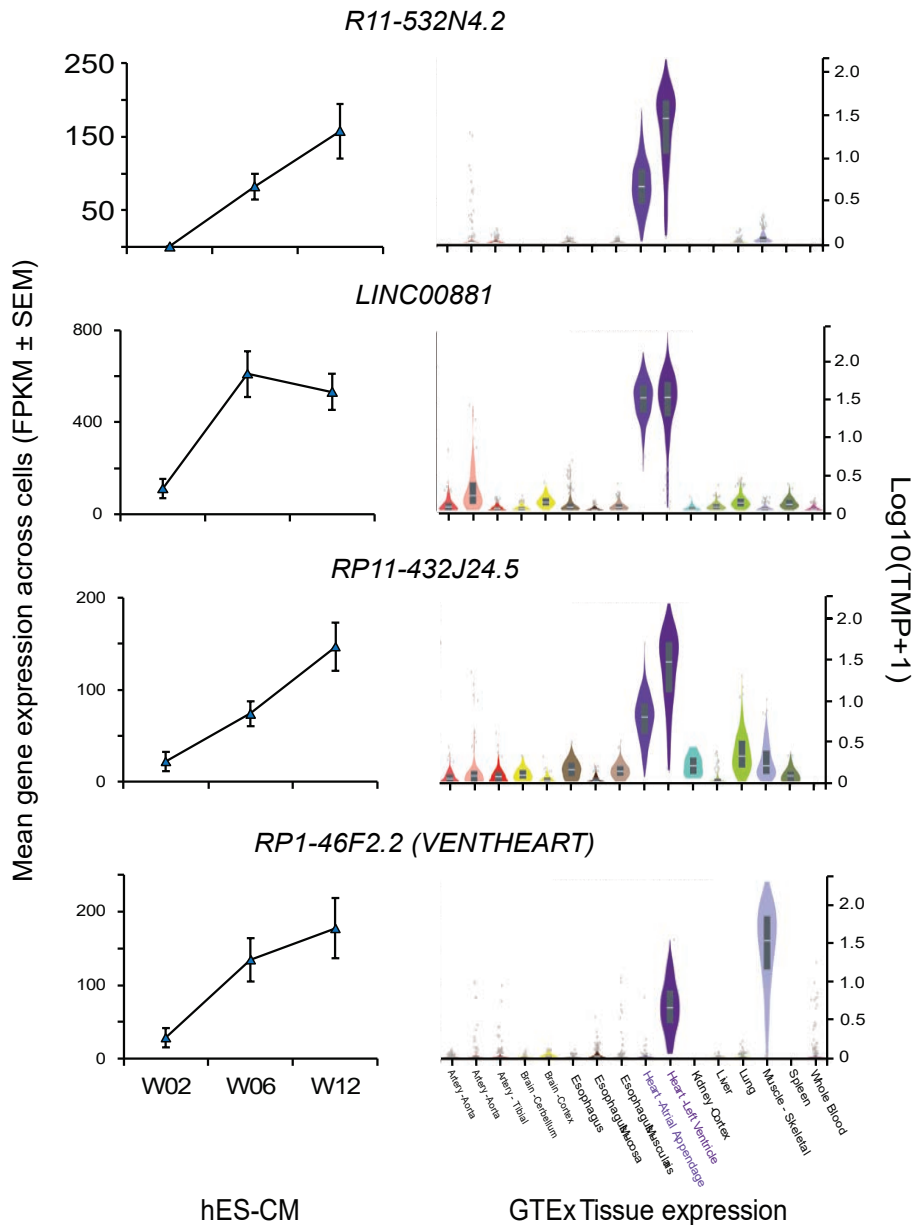



A

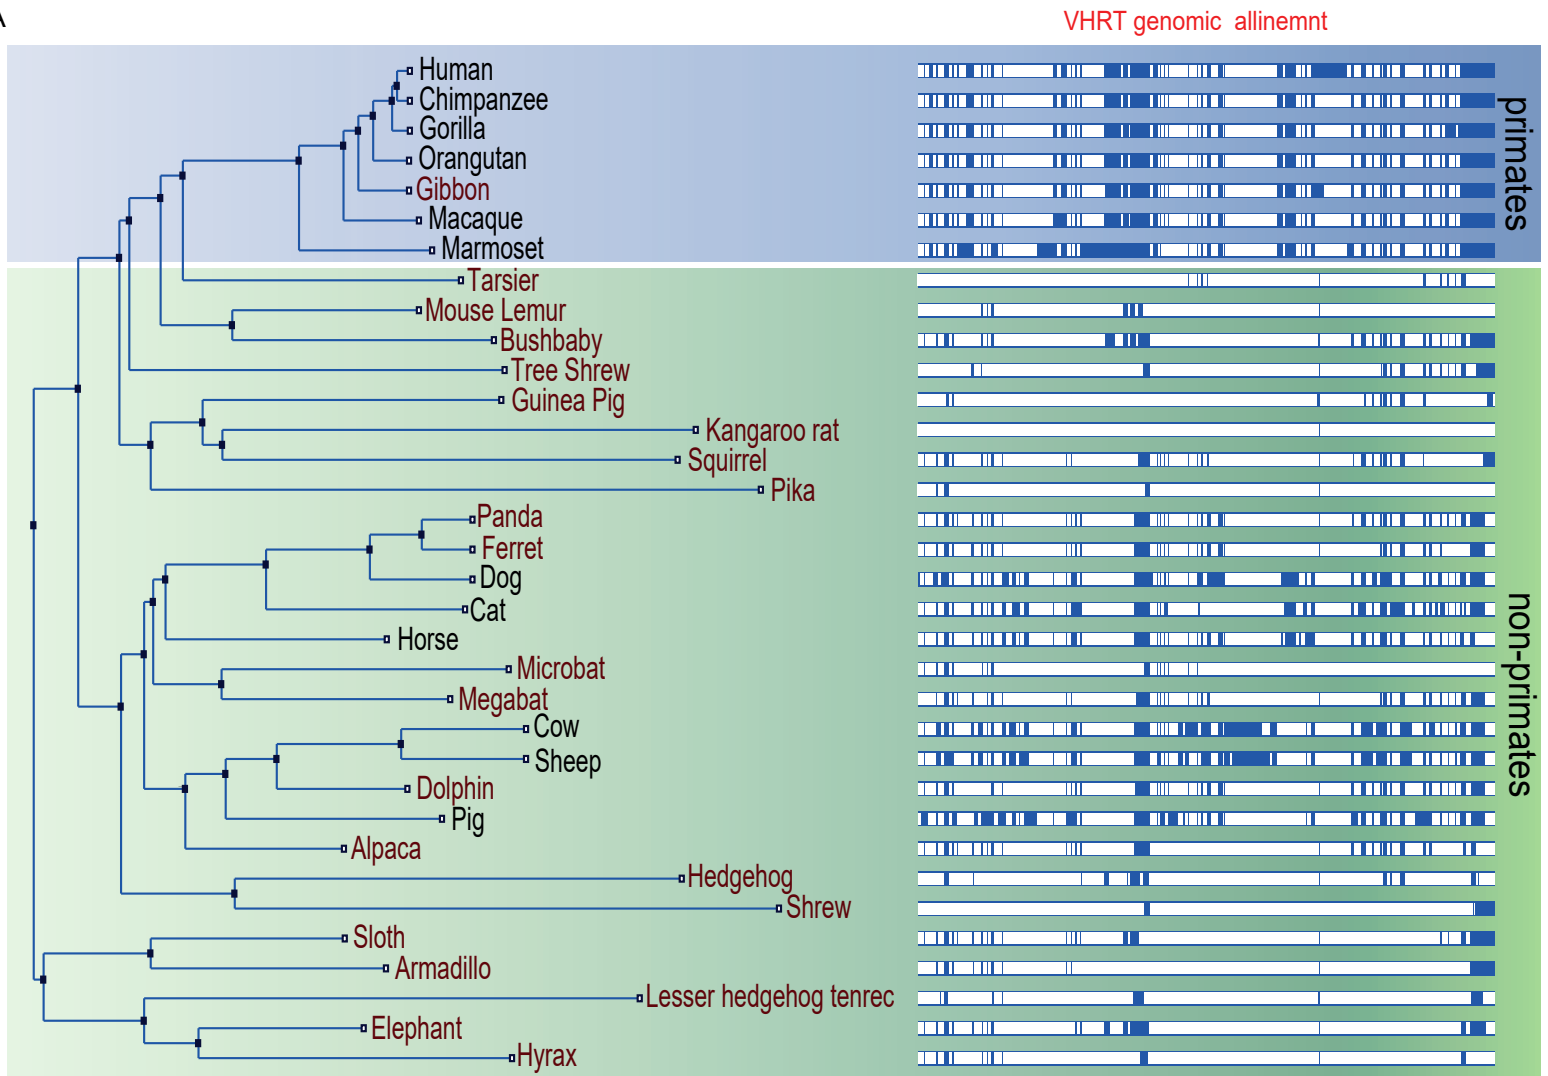

**Expanded Alignments**

Species:  
 SpeciesName: low quality assembly  
 SpeciesName: high quality assembly

Aligned seq:  
 □ gap  
 ■ aligned

B

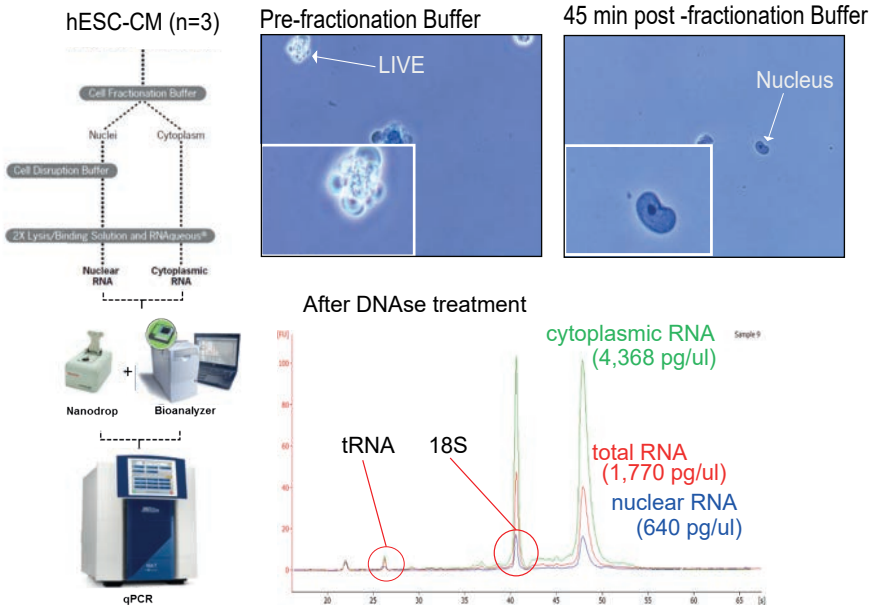

C

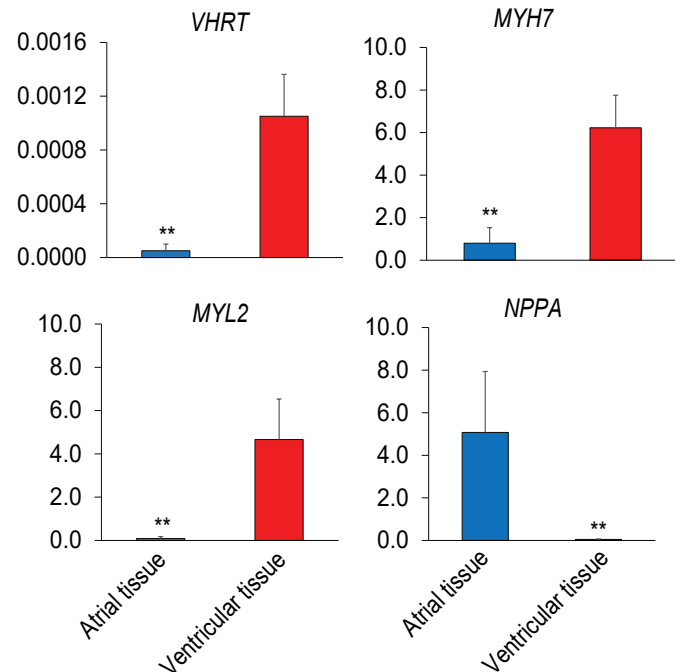

Supplementary Figure 6

A

| Gene ID     | Isoform ID<br>[Ensembl or<br>NONCODE] | Sequence length<br>[bp] | Coding / non-coding | Coding Potential Score | BLAST summary          |           |             |                    |                        |
|-------------|---------------------------------------|-------------------------|---------------------|------------------------|------------------------|-----------|-------------|--------------------|------------------------|
|             |                                       |                         |                     |                        | HIT ID<br>[Uniprot]    | HIT score | FRAME score | ORF length<br>[bp] | Protein length<br>[AA] |
| <i>VHRT</i> | ENST00000331096                       | 364                     | coding              | 1.17211                | Q8IVN4_human           | 27.5      | 252.5       | 229                | 77                     |
|             | ENST00000553177                       | 524                     | noncoding           | -0.510149              | -                      | -         | -           | -                  | -                      |
|             | ENST00000547607                       | 674                     | noncoding           | -0.995032              | -                      | -         | -           | -                  | -                      |
|             | ENST00000548368                       | 705                     | noncoding           | -0.686213              | -                      | -         | -           | -                  | -                      |
|             | NONHSAT030711.2                       | 872                     | coding              | 0.914967               | Q8IVN4_human           | 27        | 243         | 357                | 119                    |
|             | NONHSAT162760.1                       | 937                     | noncoding           | -0.961563              | -                      | -         | -           | -                  | -                      |
| MYL2        | ENSG00000111245                       | 664                     | coding              | 3.56504                | P10916<br>(MLRV_human) | 31.6      | 347.6       | 457                | 153                    |
| MYH7        | ENST00000355349                       | 6087                    | coding              | 37.1071                | P12883<br>(MYH7_human) | 187.3     | 989.1       | 5806               | 1936                   |

B

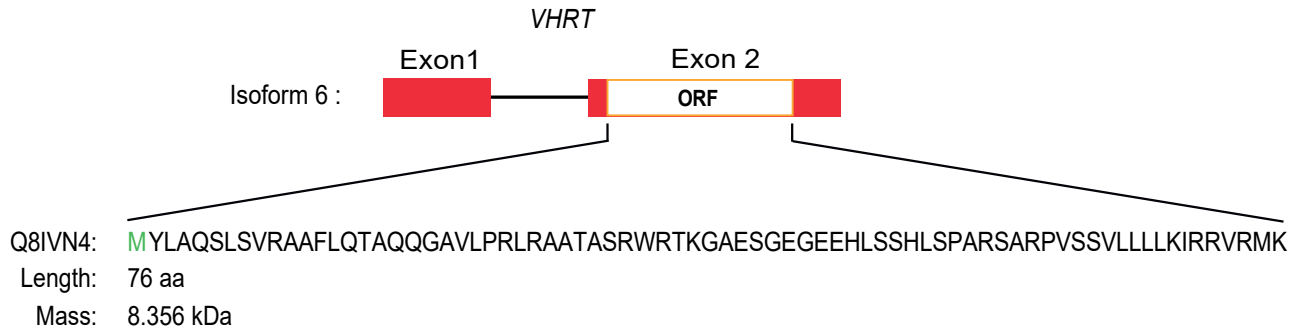

C

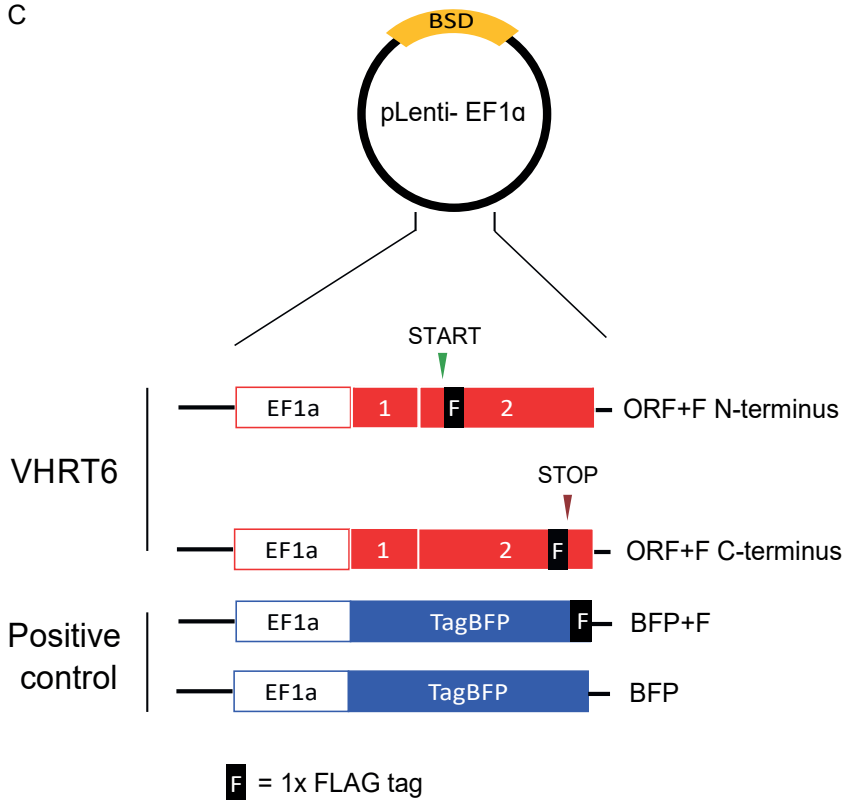

D

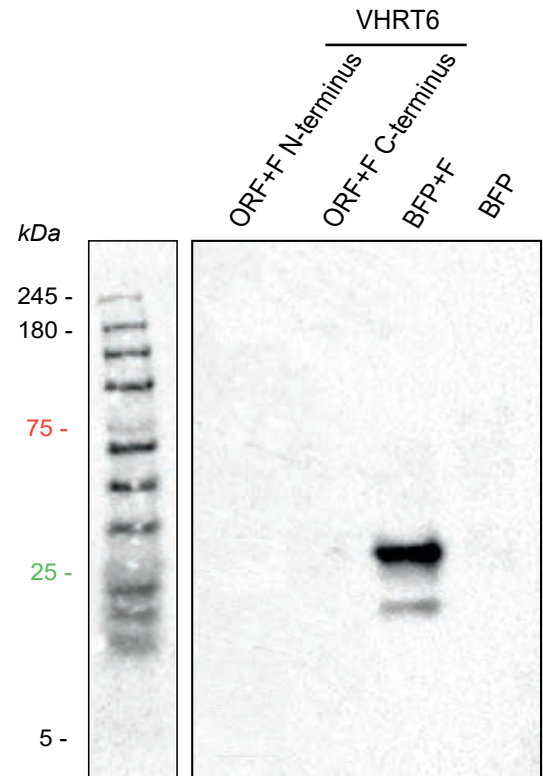

Supplemental Figure 7

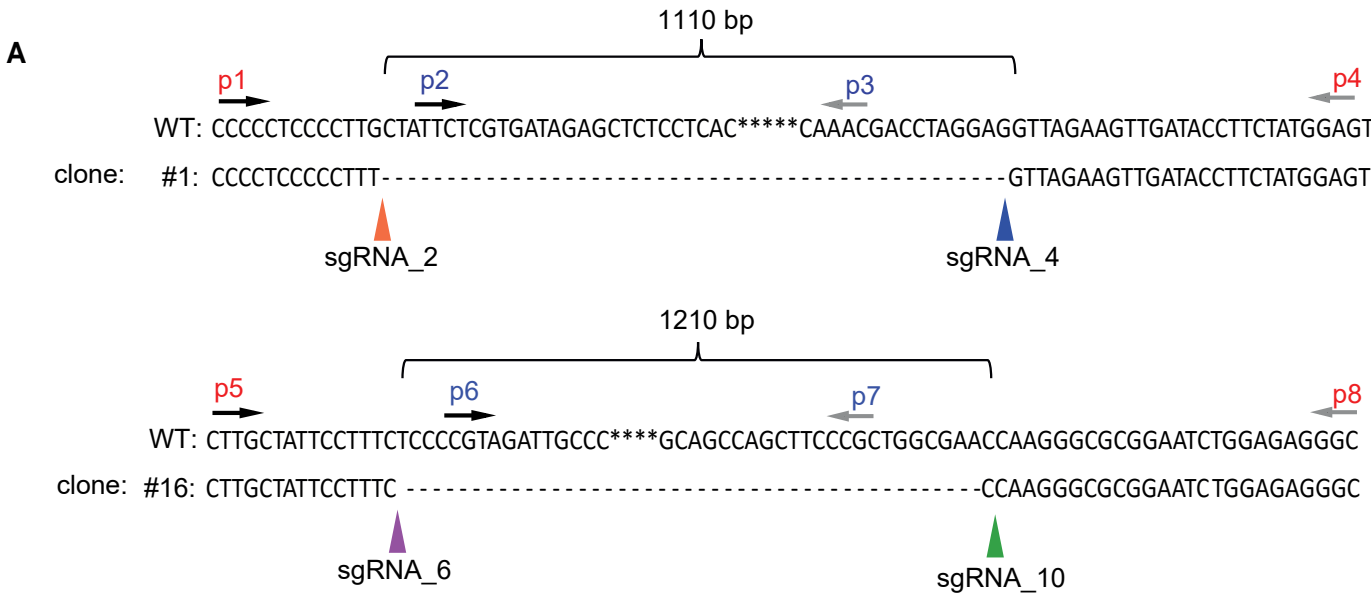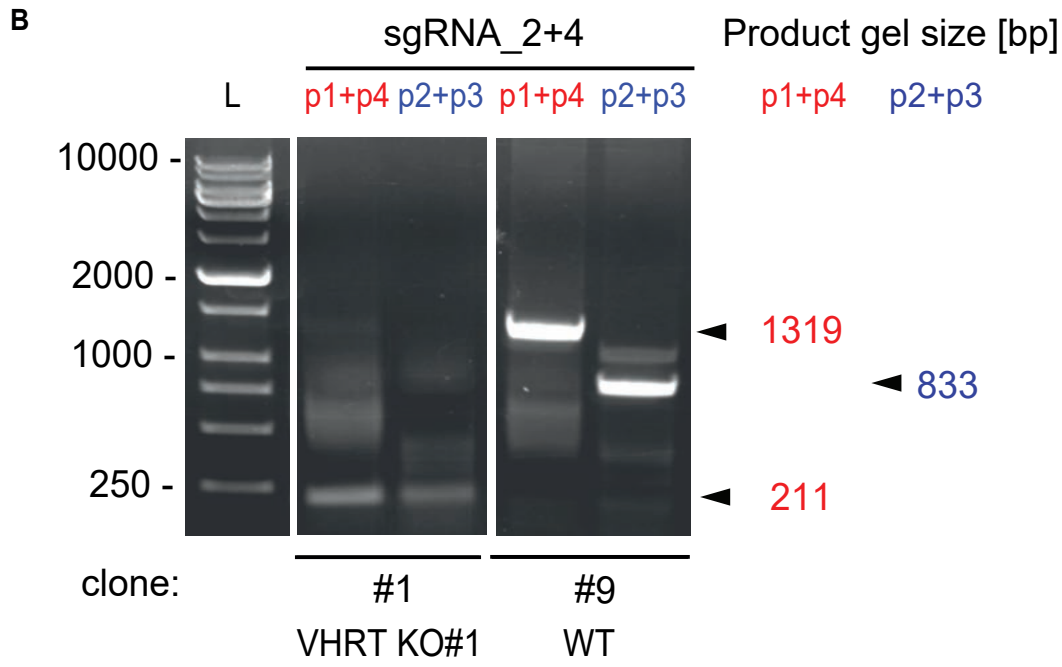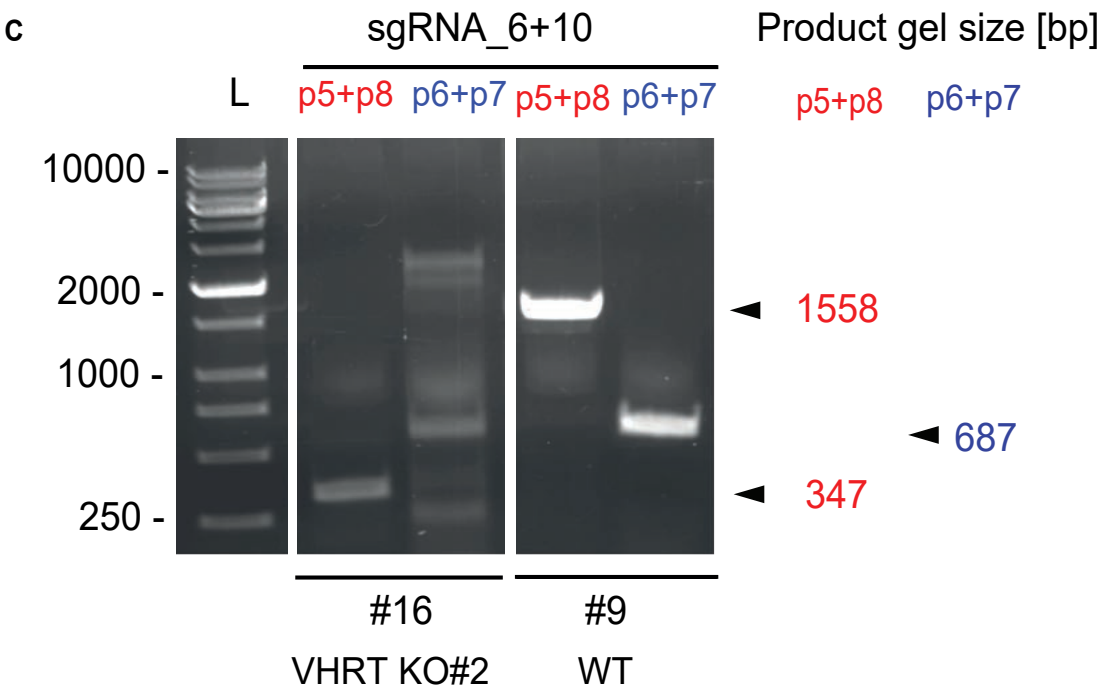

Supplemental Figure 8

**A**

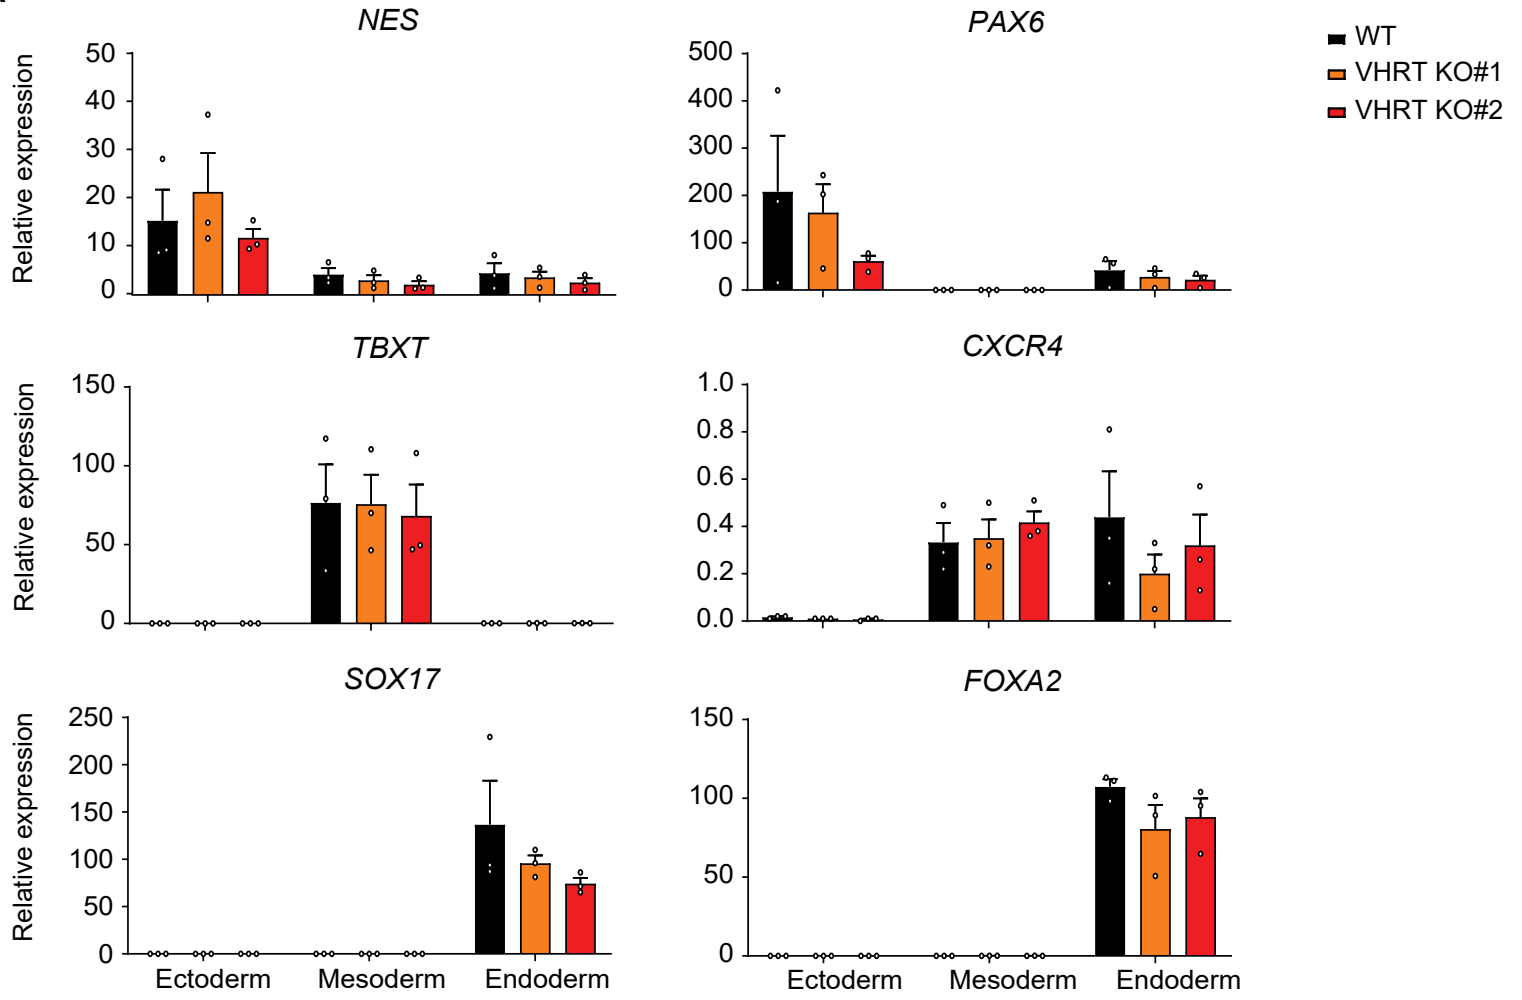

**B**

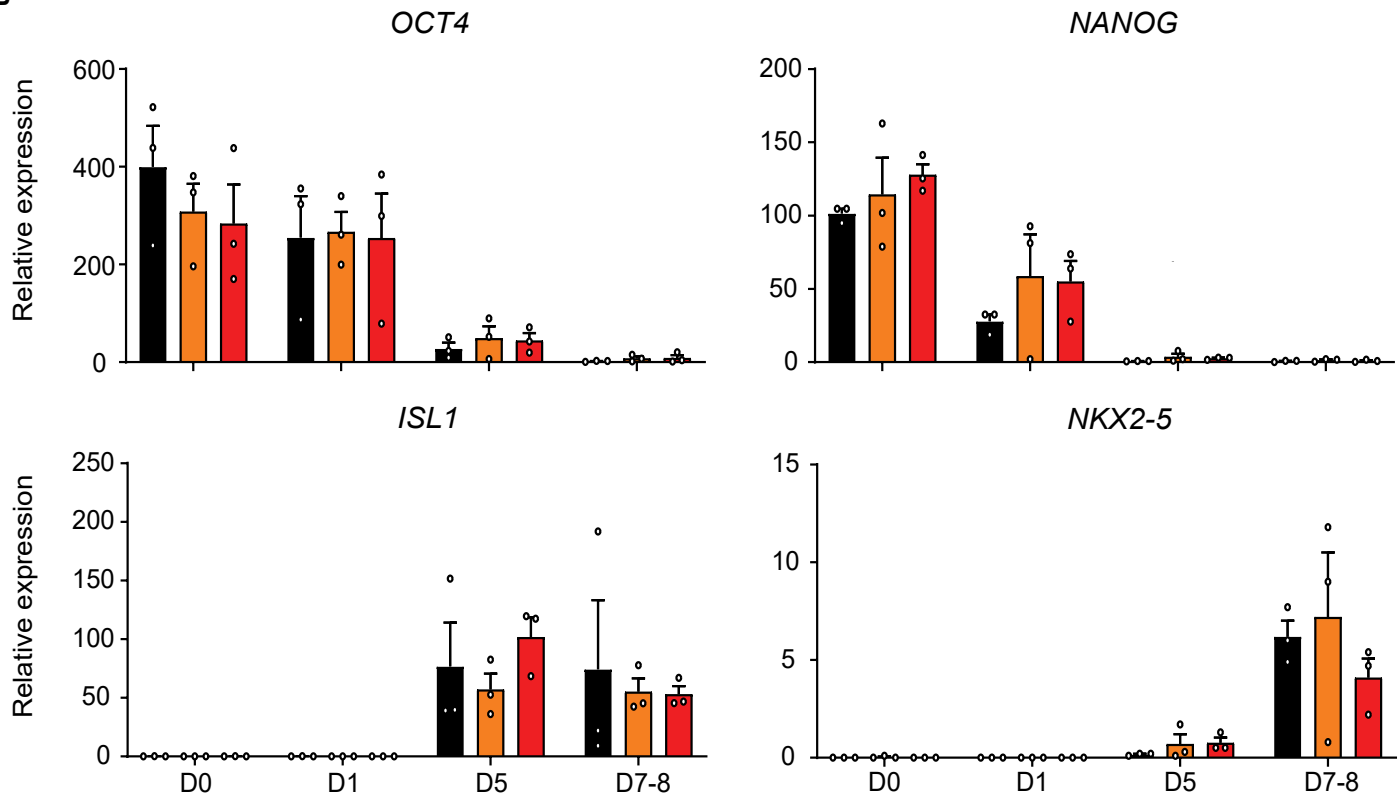

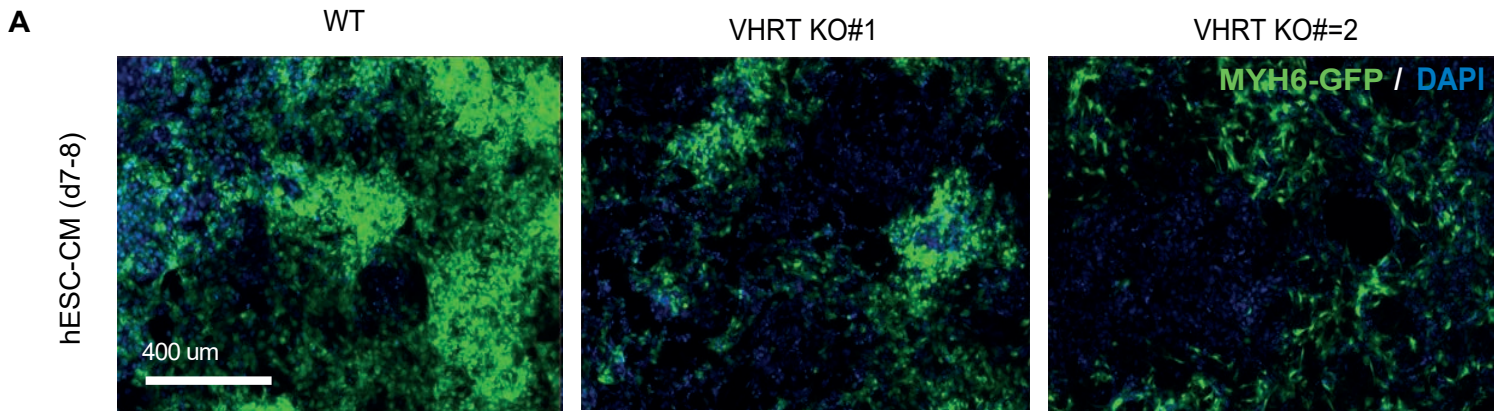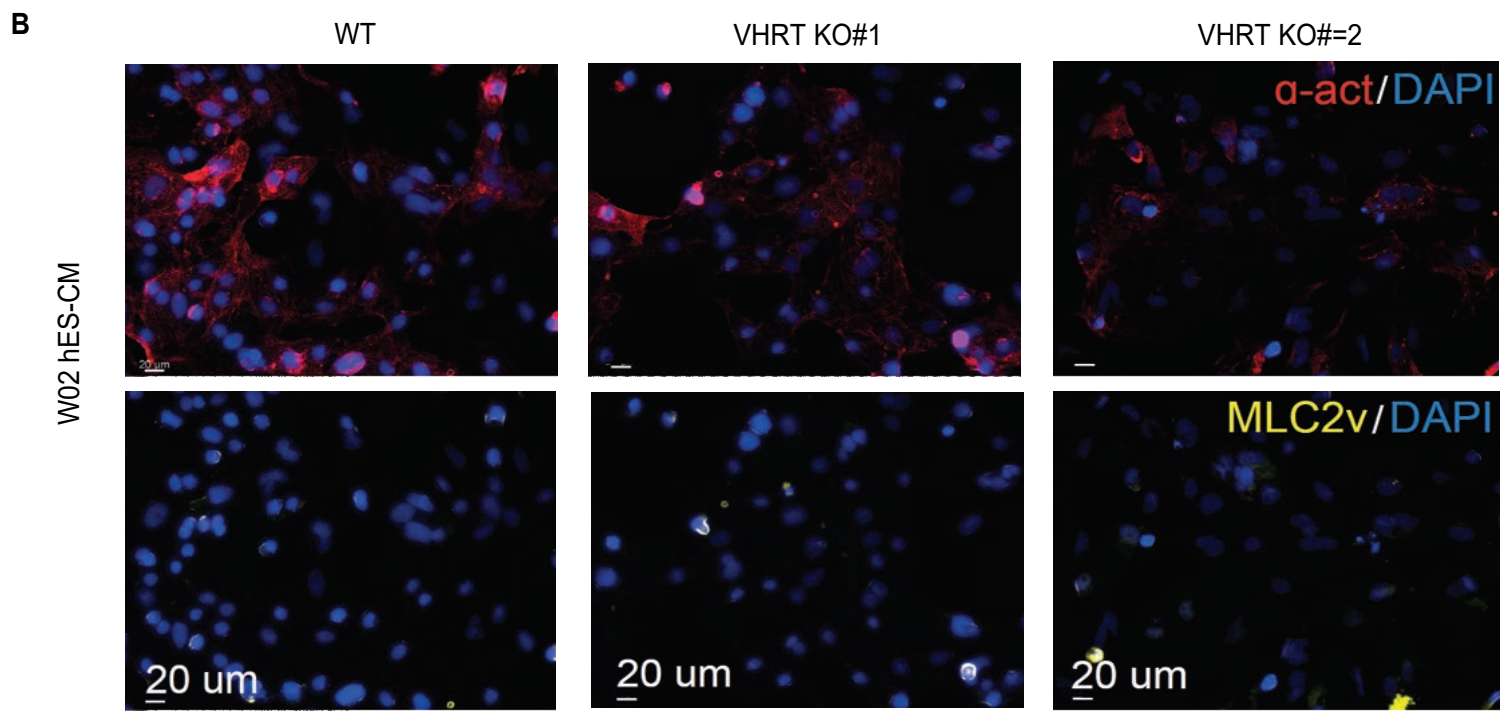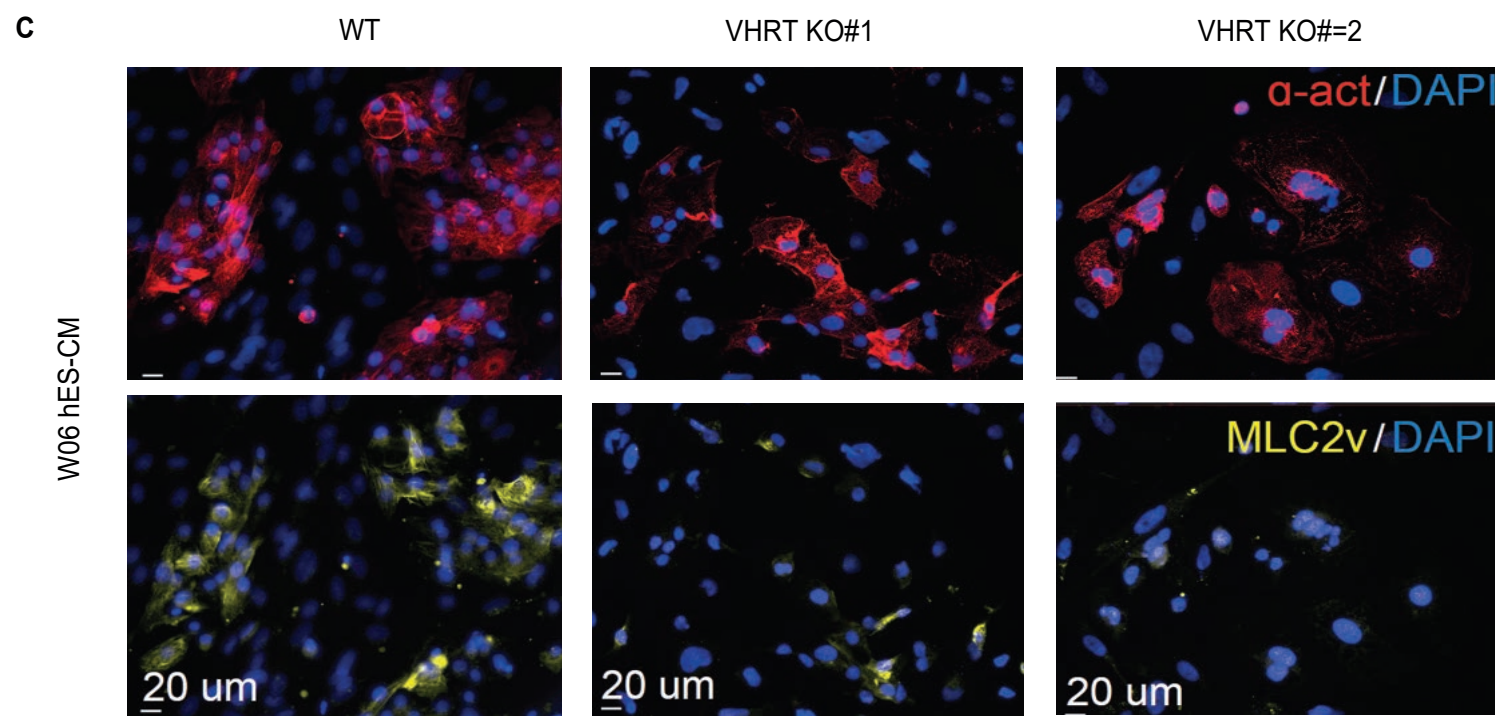

**A**

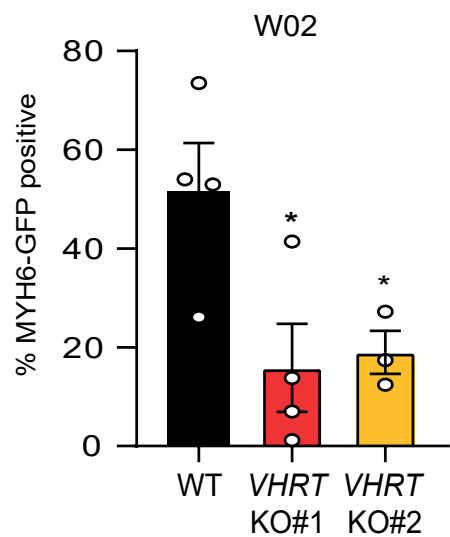

**B**

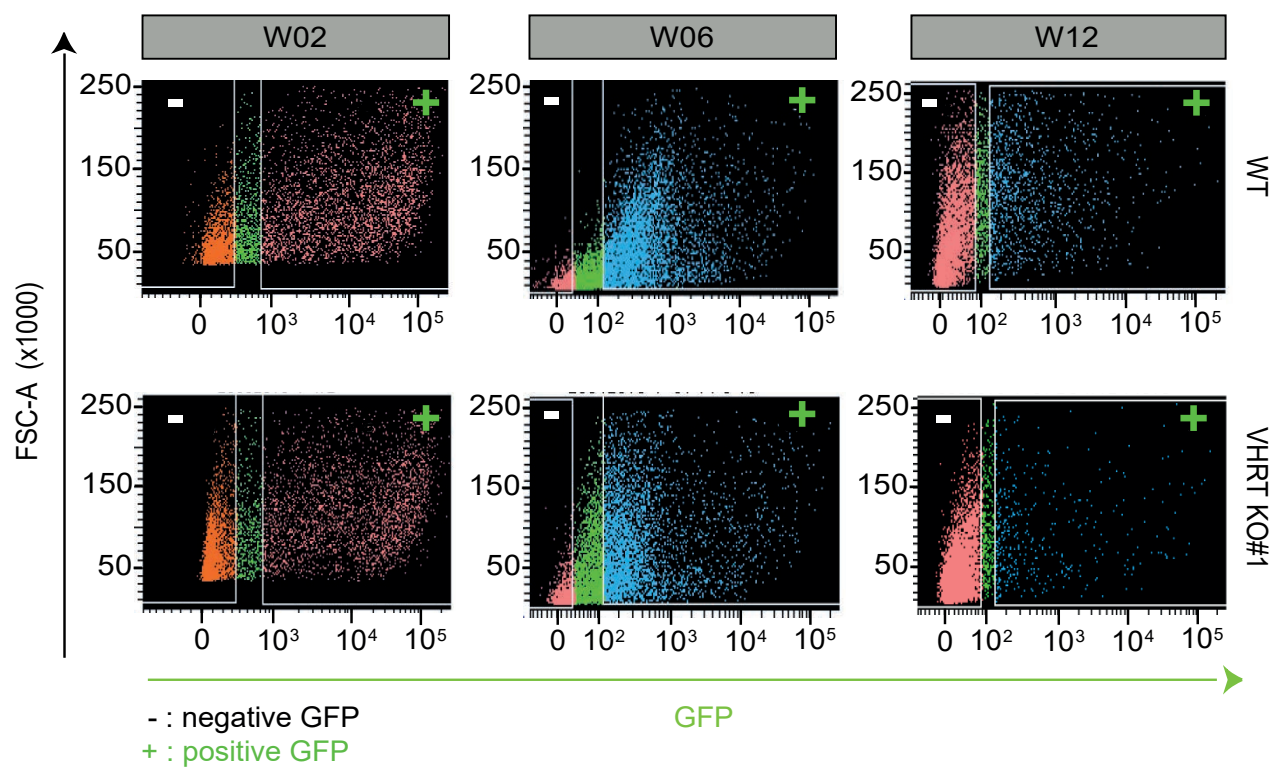

**A**

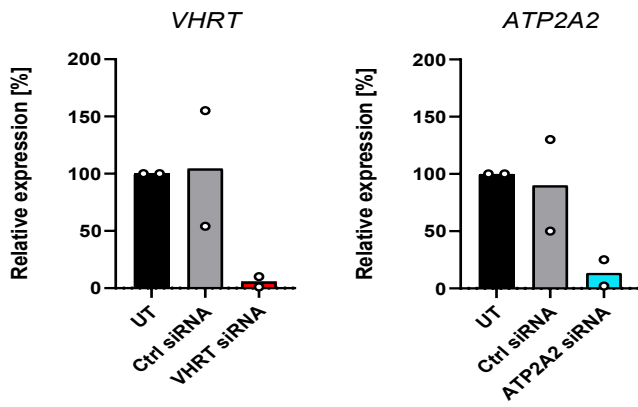

**B**

| Condition                          | Tot. no. cells | APA [mV]    | MDP [mV]     | Overshoot [mV] | Vmax [dV/dt] | APD90 [ms]    | APD50 [ms]   | APD20 [ms]    | APD 90/50 ratio | APD 90-20     |
|------------------------------------|----------------|-------------|--------------|----------------|--------------|---------------|--------------|---------------|-----------------|---------------|
| <b>VHRT GapmR#1</b><br>[mean ± SD] | 14             | 92.4 ± 13.6 | -53.7 ± 6.6* | 38.7 ± 14.9    | 9.4 ± 6.3    | 444.2 ± 118.5 | 330.4 ± 95.2 | 192.8 ± 60.9  | 1.36 ± 0.1*     | 251.4 ± 79.9* |
| <b>Negative CTR</b><br>[mean ± SD] | 15             | 99.1 ± 10   | -61.2 ± 7.1  | 37.9 ± 8.0     | 8.2 ± 4.6    | 411.5 ± 100.6 | 379 ± 109.6  | 245.4 ± 103.5 | 1.23 ± 0.1      | 166.0 ± 40.2  |

**C**

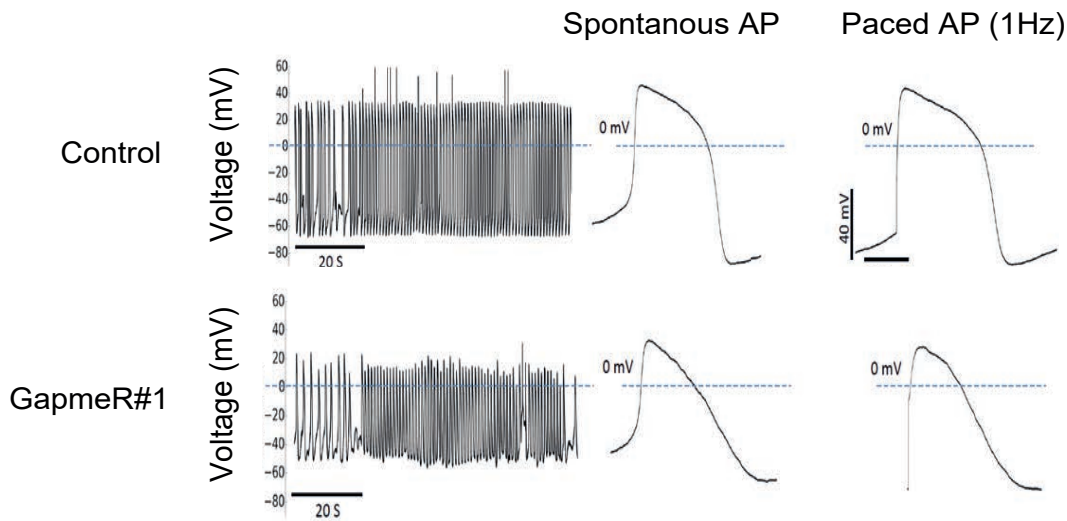

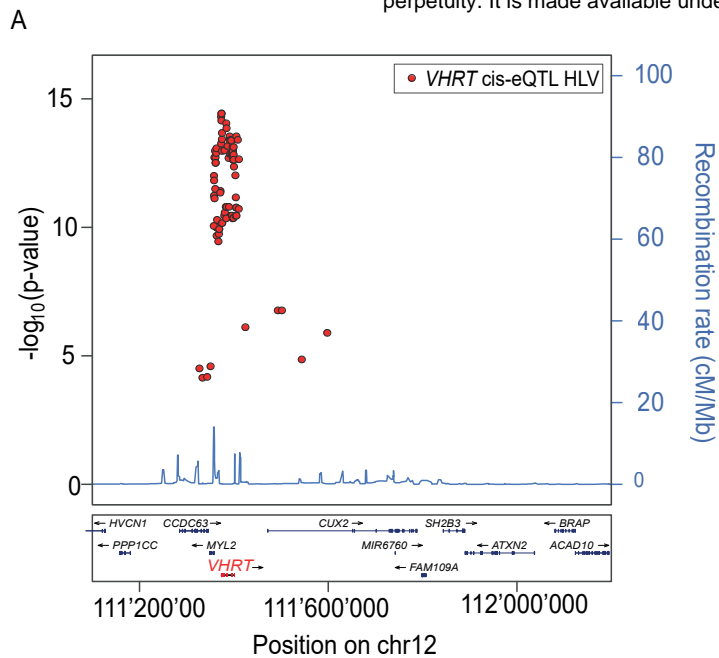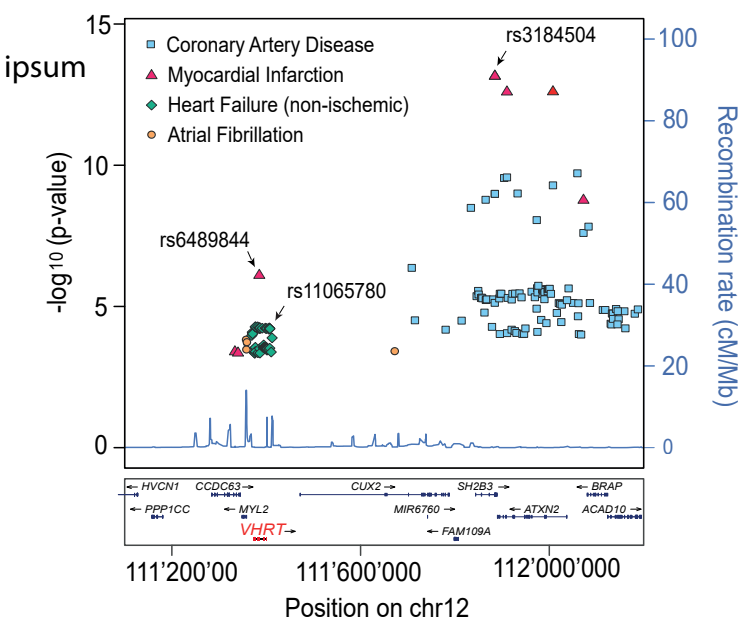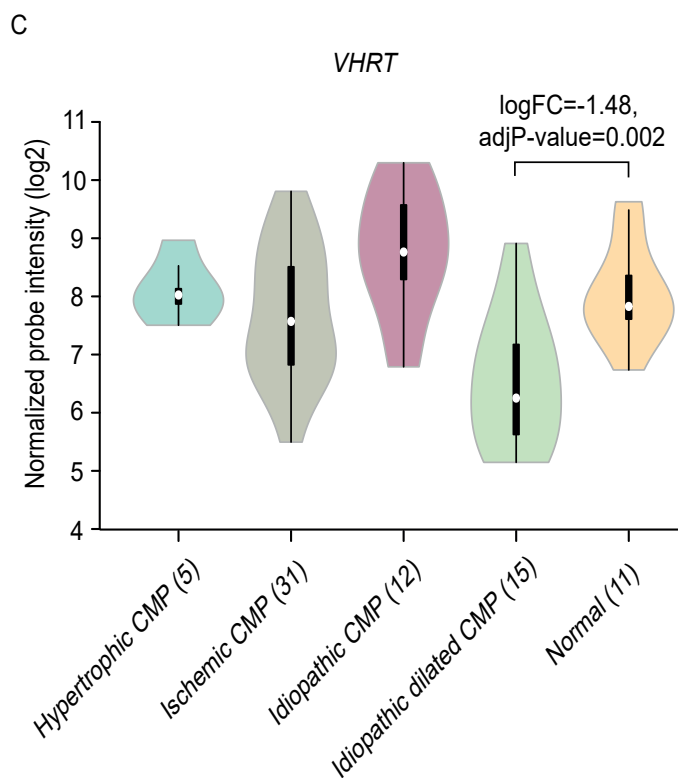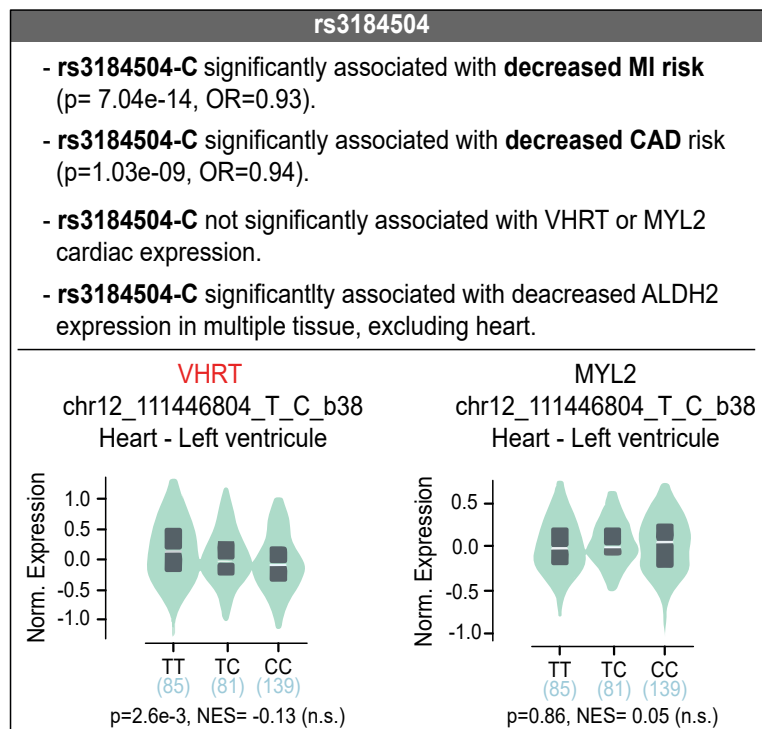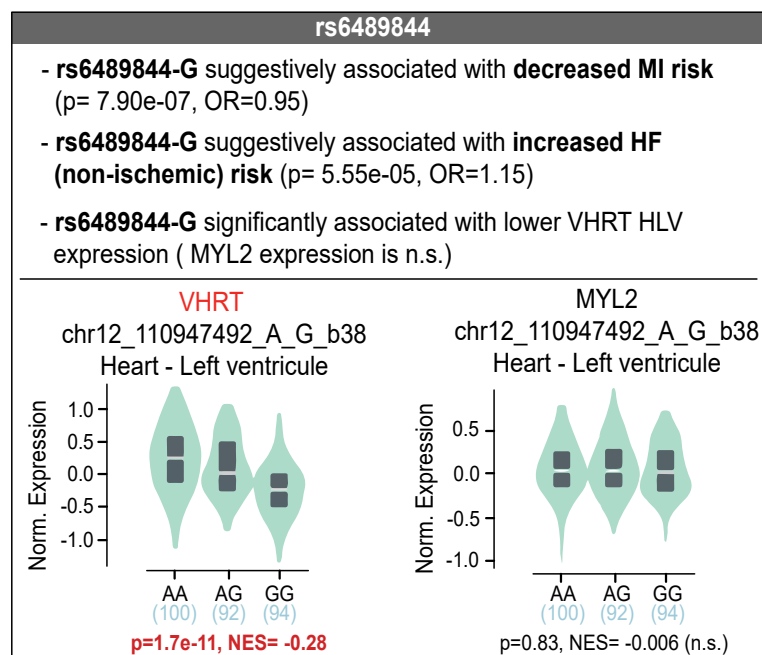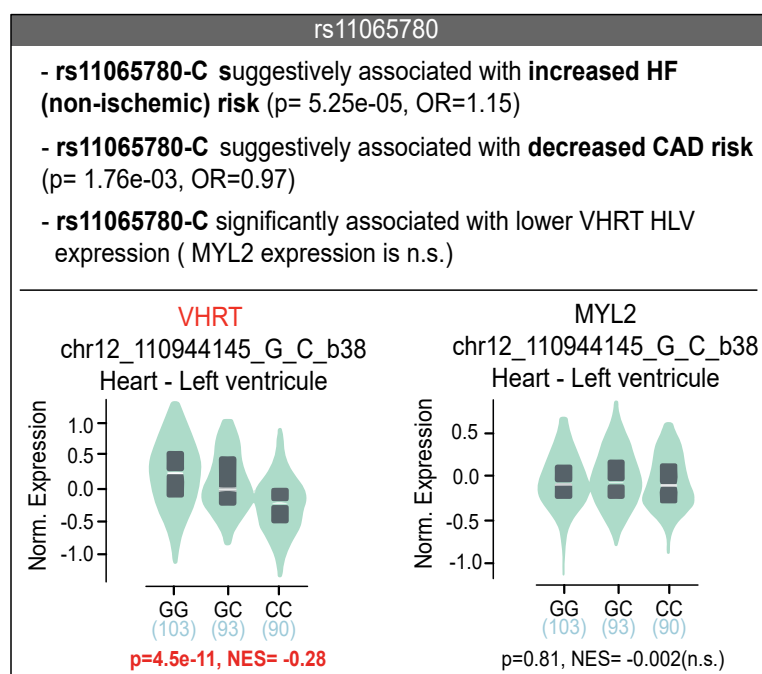



Supplementary Figure 13

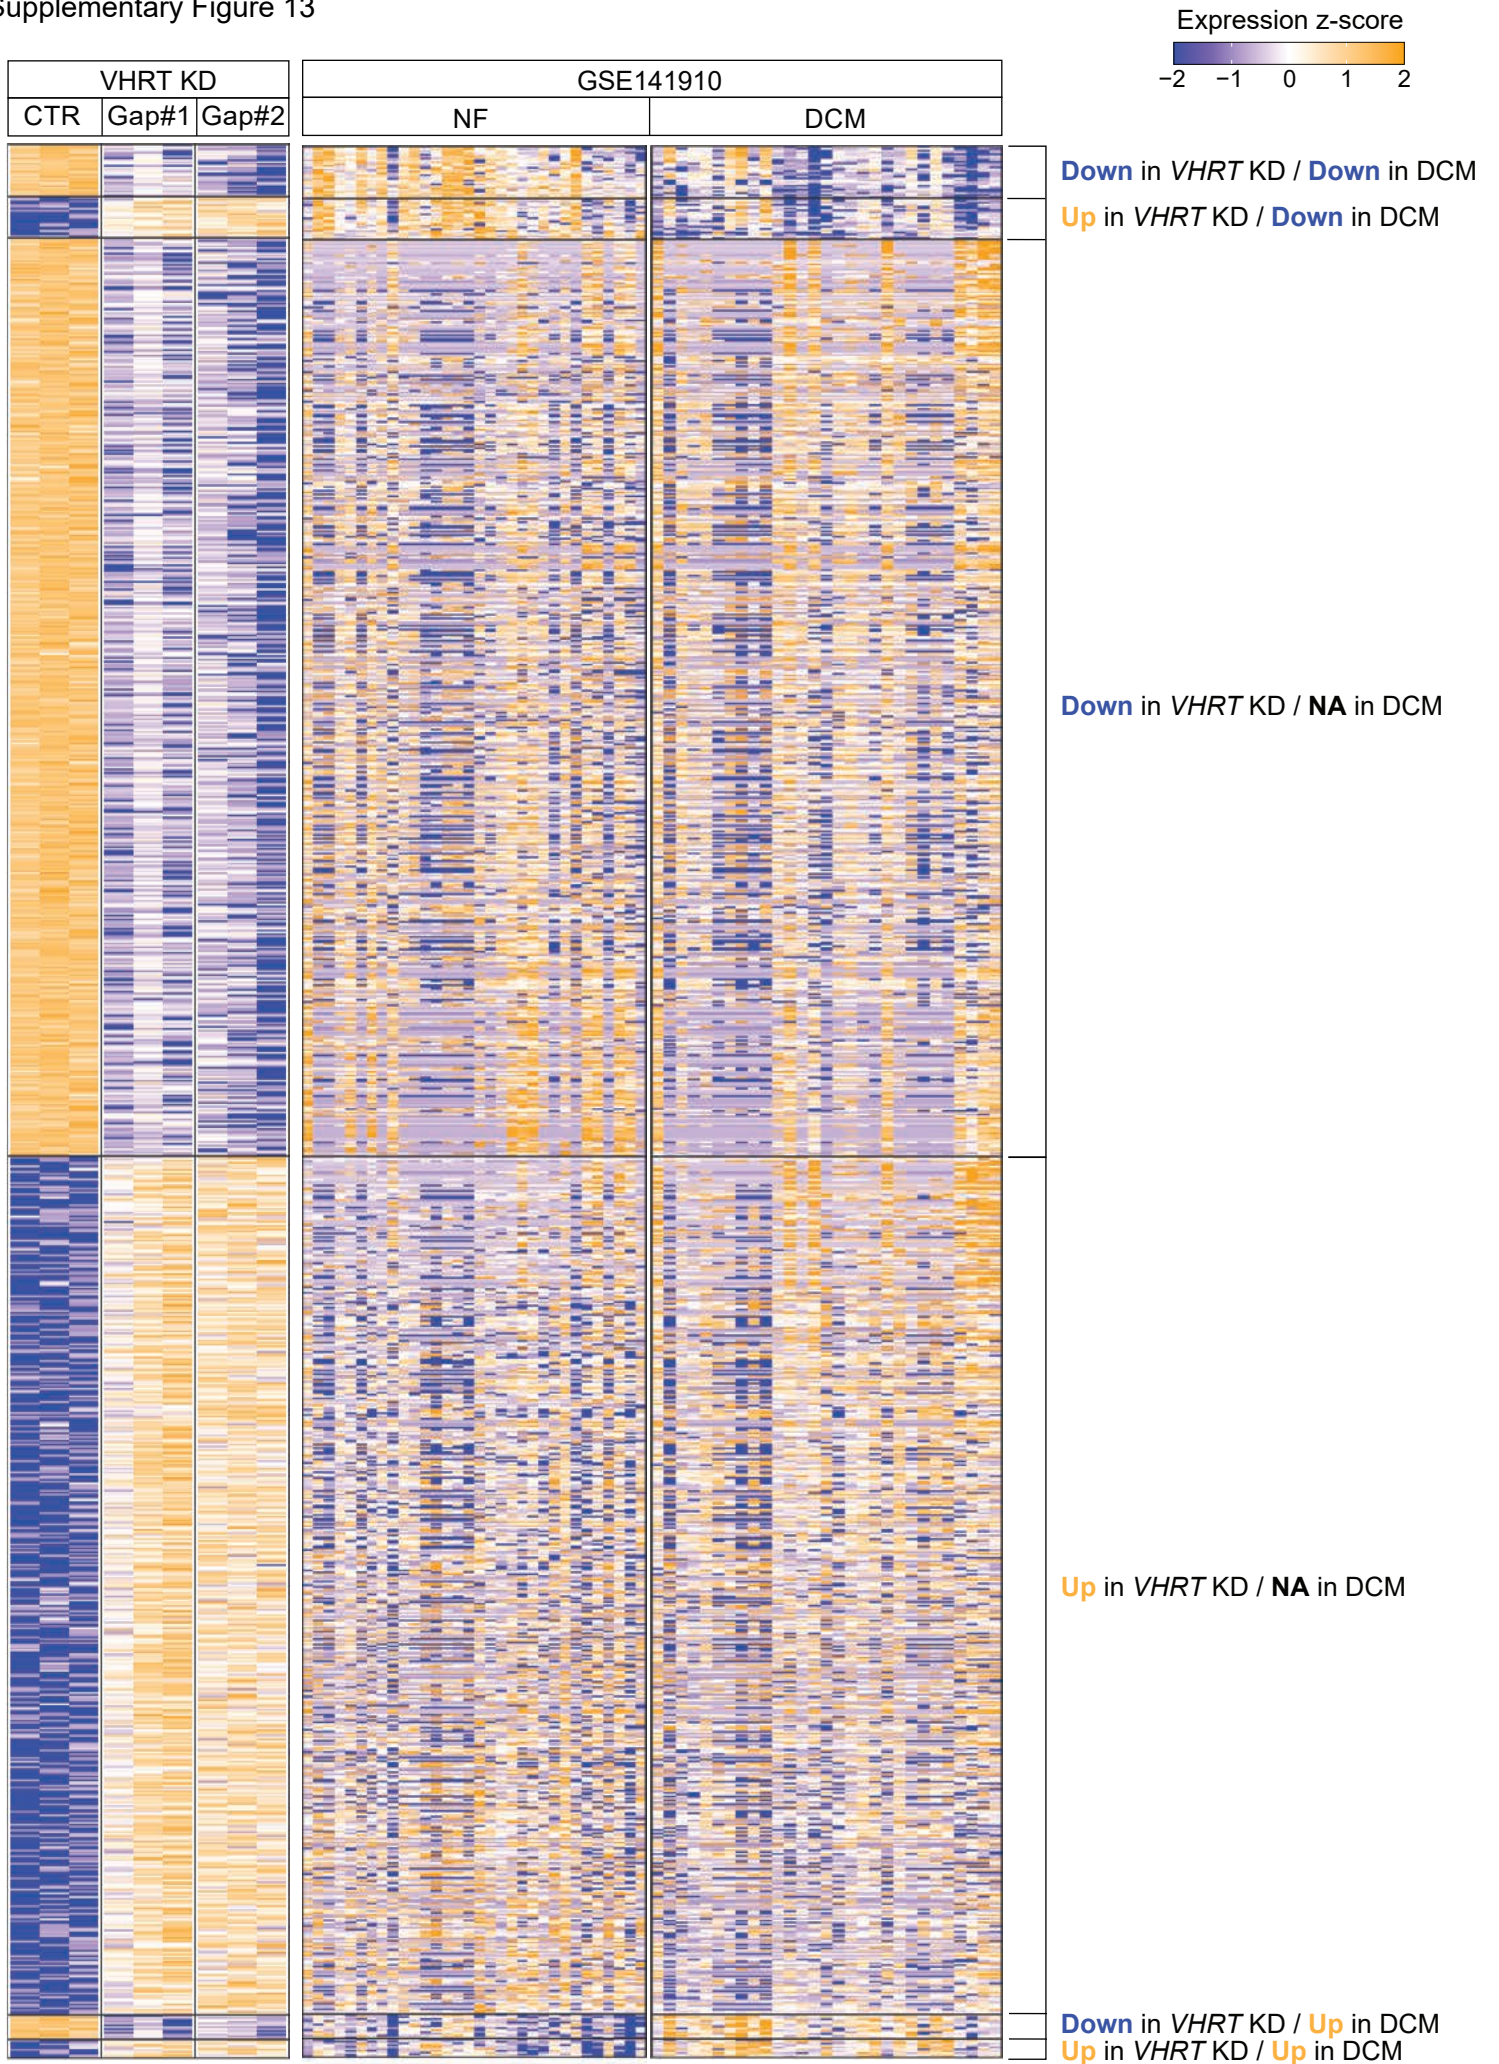

Source: https://www.biorxiv.org/content/10.1101/2021.02.01.429136v2.full.pdf
